# Supplementary material for: Carbazole–acenaphthene (donor–acceptor)-based luminophores for picric acid detection: a combined experimental and theoretical study
Source: Royal Society of Chemistry journal article supplement (doi:10.1039/d1ma00445j), 2021-01-01
Supplement: d1ma00445j1.pdf [file d1ma00445j1.pdf]

## **Carbazole-Acenaphthene (Donor-Acceptor) based luminophores for picric acid detection: a combined experimental and theoretical study**

**Aravind Babu Kajjam, Kasturi Singh, R. V. Varun Tej and Sivakumar Vaidyanathan\***

### **Table of contents**

|                               |     |
|-------------------------------|-----|
| NMR Data .....                | S2  |
| Single crystal analysis ..... | S4  |
| NMR Spectral data .....       | S10 |
| Mass data .....               | S20 |
| Chemosensors.....             | S21 |
| Lifetime analysis .....       | S29 |
| Electrochemical analysis..... | S36 |
| DFT analysis .....            | S47 |

**NMR data:**

*8-(4-(9H-carbazol-9-yl)phenyl)-7-phenyl-7H-acenaphtho[1,2-d]imidazole (AC-1)*: yellow solid (0.75 g, 45%), **<sup>1</sup>H NMR Data** (400 MHz): 8.15-8.17 (2H, d), 8.01-8.03 (1H, d), 7.76-7.79 (3H, t), 7.60-7.65 (7H, m), 7.53-7.55 (2H, d), 7.40-7.47 (6H, m), 7.30-7.34 (2H, td), 7.27-7.28 (2H, d). **<sup>13</sup>C NMR Data** (100 MHz): 149.43, 148.03, 140.45, 138.72, 137.82, 137.54, 131.66, 130.38, 129.97, 129.71, 129.44, 129.40, 128.92, 127.81, 127.06, 126.88, 126.76, 126.58, 126.51, 126.08, 125.89, 123.44, 120.74, 120.22, 120.05, 118.79, 109.68. *m/z* = calcd 509.19, Found: 510.15. Anal. calcd for C<sub>37</sub>H<sub>23</sub>N<sub>3</sub>: C, 87.21; H, 4.55; N, 8.25 Found: C, 87.09; H, 4.37; N, 8.11.

*8-(4-(9H-carbazol-9-yl)phenyl)-7-p-tolyl-7H-acenaphtho[1,2-d]imidazole (AC-2)*: yellow solid (0.80 g, 52%), **<sup>1</sup>H NMR Data** (400 MHz): 8.14-8.16 (2H, d, *J* = 8.15), 7.99-8.01 (1H, d, *J* = 8), 7.78-7.80 (2H, d, *J* = 7.79), 7.70-7.76 (2H, t, *J* = 7.74), 7.59-7.62 (1H, d, *J* = 7.60), 7.50-7.54 (4H, dd, *J* = 7.52), 7.39-7.54 (8H, m), 7.28-7.33 (2H, m), 7.25-7.27 (1H, d, *J* = 7.26), 2.53 (3H, s). **<sup>13</sup>C NMR Data** (100 MHz): 140.51, 139.05, 138.91, 137.48, 135.23, 131.72, 130.61, 129.69, 129.56, 129.47, 127.84, 126.92, 126.87, 126.55, 125.93, 125.85, 123.46, 120.71, 120.26, 118.85, 30.86. *m/z* = calcd 523.20, Found: 524.20. Anal. calcd for C<sub>38</sub>H<sub>25</sub>N<sub>3</sub>: C, 87.16; H, 4.81; N, 8.02 Found: C, 87.11; H, 4.75; N, 8.13.

*8-(4-(9H-carbazol-9-yl)phenyl)-7-(9,9-diethyl-9H-fluoren-2-yl)-7H-acenaphtho[1,2-d]imidazole (AC-3)*: yellow solid (0.86 g, 59%), **<sup>1</sup>H NMR Data** (400 MHz): 8.12-8.16 (2H, t, *J* = 8.14), 7.97-8.05 (2H, dt, *J* = 8.01), 7.83-7.85 (2H, d, *J* = 7.84), 7.75-7.77 (3H, d, *J* = 7.76), 7.62-7.64 (1H, d, *J* = 7.63), 7.47-7.53 (2H, d, *J* = 7.63), 7.47-7.53 (2H, dd, *J* = 7.50), 7.39-7.42 (7H, m), 7.29-7.30 (6H, m), 2.02-2.07 (4H, m), 1.28 (3H, s), 0.87 (3H, s). **<sup>13</sup>C NMR Data** (100 MHz): 151.94, 149.95, 149.41, 147.89, 142.32, 140.46, 140.02, 138.83, 137.49, 36.35, 134.13, 131.68, 131.48, 130.35,

129.77, 129.52, 129.46, 128.18, 127.96, 127.87, 127.20, 127.07, 126.92, 126.61, 126.08, 125.86, 124.54, 123.27, 122.98, 121.02, 120.86, 120.23, 120.09, 120.02, 119.92, 118.74, 109.61, 56.50, 32.57, 30.02, 29.61, 8.47.  $m/z$  = calcd 653.28, Found: 654.37. Anal. calcd for  $C_{45}H_{35}N_3$ : C, 88.18; H, 5.40; N, 6.43 Found: C, 88.09; H, 5.28; N, 6.26.

*8-(4-(9H-carbazol-9-yl)phenyl)-7-(3-(trifluoromethyl)phenyl)-7H-acenaphtho[1,2-d]imidazole*  
(AC-4): yellow-orange solid (0.45 g, 49%),  **$^1H$  NMR Data** (400 MHz): 8.67-8.69 (2H, dd,  $J$  = 8.68), 8.31-8.33 (2H, dd,  $J$  = 8.32), 8.15-8.17 (2H, m), 8.02-8.04 (1H, d,  $J$  = 8.03), 7.72-7.81 (7H, m), 7.57 (3H, m), 7.45 (3H, m), 7.30-7.34(2H, m).  **$^{13}C$  NMR Data** (100 MHz): 134.48, 132.29, 131.70, 130.65, 129.9, 129.73, 127.90, 127.40, 127.0, 126.78, 125.95, 121.06, 120.23, 120.1, 118.73, 109.76, 109.57.  $m/z$  = calcd 577.18, Found: 578.35. Anal. calcd for  $C_{38}H_{22}F_3N_3$ : C, 79.02; H, 3.84; N, 7.27 Found: C, 79.10; H, 3.77; N, 7.16.

*8-(4-(9H-carbazol-9-yl)phenyl)-7-(4-(trifluoromethyl)phenyl)-7H-acenaphtho[1,2-d]imidazole*  
(AC-5): yellow solid (0.55 g, 43%),  **$^1H$  NMR Data** (400 MHz): 8.15-8.17 (1H, d,  $J$  = 8.16), 8.0-8.02 (1H, d,  $J$  = 8.09), 7.91-7.93 (1H, d,  $J$  = 7.92), 7.77-7.81 (3H, dd,  $J$  = 7.79), 7.73-7.75 (2H, d,  $J$  = 7.74), 7.63-7.67 (4H, t,  $J$  = 7.65), 7.57-7.60 (4H, m), 7.43-7.47 (4H, m), 7.28-7.34 (3H, m).  **$^{13}C$  NMR Data** (100 MHz): 140.82, 140.31, 138.05, 129.87, 129.51, 128.73, 127.92, 127.48, 127.22, 127.1, 126.95, 126.93, 126.63, 126.40, 126.30, 126.27, 126.1, 125.97, 123.50, 121.07, 120.2, 119.16, 118.91, 109.61.  $m/z$  = calcd 577.18, Found: 578.35. Anal. calcd for  $C_{38}H_{22}F_3N_3$ : C, 79.02; H, 3.84; N, 7.27 Found: C, 79.11; H, 3.86; N, 7.24.

*3-(8-(4-(9H-carbazol-9-yl)phenyl)-7H-acenaphtho[1,2-d]imidazol-7-yl)benzotrile(AC-6):*  
yellow solid (0.72 g, 61%),  **$^1H$  NMR Data** (400 MHz): 8.15-8.17 (2H, d,  $J$  = 8.16), 8.02-8.04 (1H, d,  $J$  = 8.03), 7.96 (1H, d,  $J$  = 7.96), 7.88-7.91 (2H, m), 7.78-7.82 (3H, m), 7.71-7.74 (2H, d,  $J$  = 7.73), 7.62-7.66 (1H, dd,  $J$  = 7.64), 7.58-7.60 (2H, d,  $J$  = 7.59), 7.44-7.48 (5H, m), 7.30-7.34 (2H,

m), 7.24-7.26 (2H, d, J = 7.25). **<sup>13</sup>C NMR Data** (100 MHz):140.33, 138.82, 138.20, 134.67, 133.63, 132.66, 132.41, 131.83, 131.07, 130.57, 129.90, 129.83, 129.52, 129.29, 128.93, 128.50, 127.97, 127.55, 127.05, 127.04, 126.93, 126.85, 126.62, 126.12, 126.00, 125.75, 123.51, 121.23, 120.54, 120.40, 120.27, 120.21, 120.13, 119.77, 118.73, 117.18, 114.36, 109.62, 109.57. m/z = calcd 534.17, Found: 535.62. Anal. calcd for C<sub>38</sub>H<sub>22</sub>N<sub>4</sub>:C, 85.37; H, 4.15; N, 10.48 Found: C, 85.28; H, 4.10; N, 10.38.

### Single crystal analysis:

Single crystals are grown by slow evaporation method by using dichloromethane solvent. The grown crystals were typically adapting one of only a few possible 3D orientations. When a monochromatic X-ray beam is passed through a single crystal, the radiation interacts with the electrons in the atoms, resulting in scattering of the radiation to produce a unique image pattern. Multiple images are recorded, with an area X-ray detector, as the crystal is rotated in the X-ray beam. Computationally intensive analysis of a set images results in a solution for the 3D structure of the molecule.

**Table ST1.** Crystal data and structure-refinement parameters of AC-1 and AC-2.

| Identification code      | AC-1                                           | AC-2                                           |
|--------------------------|------------------------------------------------|------------------------------------------------|
| <b>Empirical formula</b> | C <sub>37</sub> H <sub>23</sub> N <sub>3</sub> | C <sub>76</sub> H <sub>50</sub> N <sub>6</sub> |
| <b>Formula weight</b>    | 509.58                                         | 1047.22                                        |
| <b>Temperature/K</b>     | 293(2)                                         | 293(2)                                         |
| <b>Crystal system</b>    | monoclinic                                     | triclinic                                      |
| <b>Space group</b>       | P2 <sub>1</sub> /c                             | P-1                                            |
| <b>a/Å</b>               | 9.2834(3)                                      | 10.2146(6)                                     |
| <b>b/Å</b>               | 22.7626(5)                                     | 11.4653(8)                                     |
| <b>c/Å</b>               | 13.0285(3)                                     | 11.8920(7)                                     |
| <b>α/°</b>               | 90.00                                          | 93.271(5)                                      |
| <b>β/°</b>               | 106.325(3)                                     | 101.152(5)                                     |
| <b>γ/°</b>               | 90.00                                          | 95.973(6)                                      |

|                                             |                                                               |                                                               |
|---------------------------------------------|---------------------------------------------------------------|---------------------------------------------------------------|
| Volume/Å <sup>3</sup>                       | 2642.13(12)                                                   | 1354.74(15)                                                   |
| Z                                           | 4                                                             | 1                                                             |
| $\rho_{\text{calc}}/\text{cm}^3$            | 1.281                                                         | 1.284                                                         |
| $\mu/\text{mm}^{-1}$                        | 0.075                                                         | 0.075                                                         |
| F(000)                                      | 1064.0                                                        | 548.0                                                         |
| Crystal size/mm <sup>3</sup>                | 0.529 × 0.372 × 0.183                                         | 0.413 × 0.246 × 0.198                                         |
| Radiation                                   | MoK $\alpha$ ( $\lambda$ = 0.71073)                           | MoK $\alpha$ ( $\lambda$ = 0.71073)                           |
| 2 $\theta$ range for data collection/°      | 3.72 to 56.66                                                 | 3.5 to 56.62                                                  |
| Index ranges                                | -12 ≤ h ≤ 12, -10 ≤ k ≤ 28, -17 ≤ l ≤ 8                       | -13 ≤ h ≤ 11, -15 ≤ k ≤ 15, -12 ≤ l ≤ 15                      |
| Reflections collected                       | 8939                                                          | 8282                                                          |
| Independent reflections                     | 5728 [R <sub>int</sub> = 0.0206, R <sub>sigma</sub> = 0.0382] | 5832 [R <sub>int</sub> = 0.0156, R <sub>sigma</sub> = 0.0352] |
| Data/restraints/parameters                  | 5728/0/361                                                    | 5832/0/371                                                    |
| Goodness-of-fit on F <sup>2</sup>           | 1.156                                                         | 1.142                                                         |
| Final R indexes [I ≥ 2 $\sigma$ (I)]        | R <sub>1</sub> = 0.0597, wR <sub>2</sub> = 0.1629             | R <sub>1</sub> = 0.0556, wR <sub>2</sub> = 0.1333             |
| Final R indexes [all data]                  | R <sub>1</sub> = 0.0876, wR <sub>2</sub> = 0.1796             | R <sub>1</sub> = 0.0794, wR <sub>2</sub> = 0.1472             |
| Largest diff. peak/hole / e Å <sup>-3</sup> | 0.19/-0.26                                                    | 0.18/-0.19                                                    |

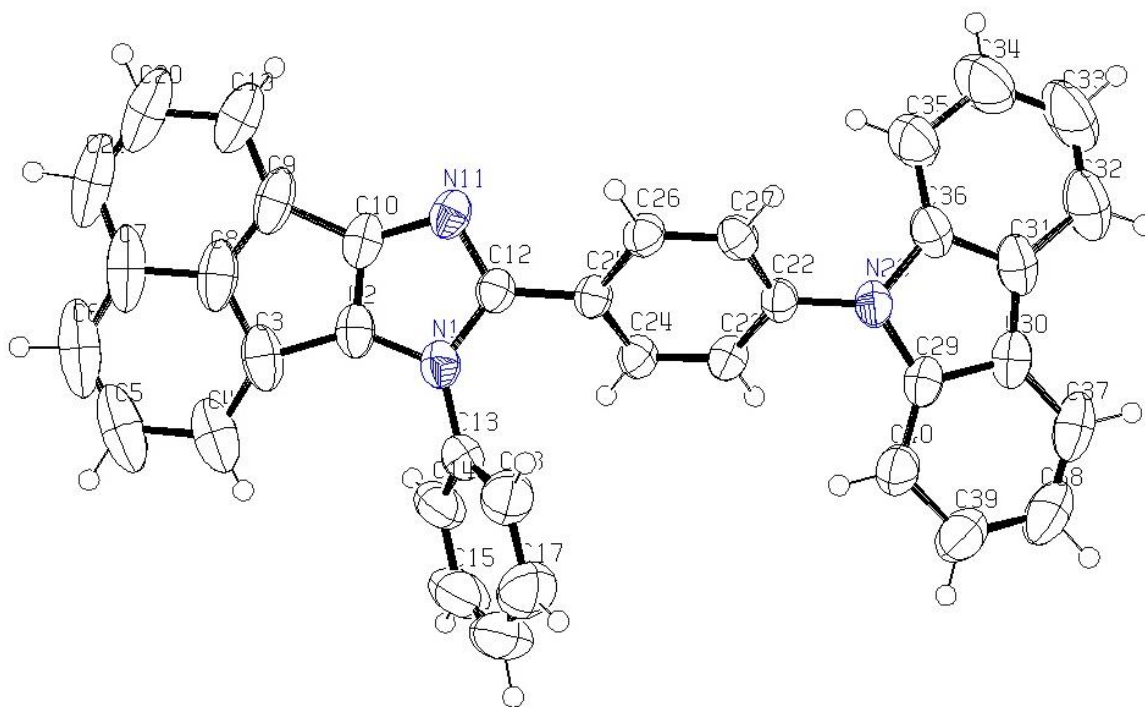

Fig. S1. ORTEP Diagram of AC-1 (eclipsed form 50% probability). N atoms blue, F atoms in green and O atoms in red in color.

**Table ST2:** Bond Lengths for AC-1.

| <b>Atom Atom</b> | <b>Length/Å</b> | <b>Atom Atom</b> | <b>Length/Å</b> |
|------------------|-----------------|------------------|-----------------|
| N11 C12          | 1.333(3)        | C13 C14          | 1.380(4)        |
| N11 C10          | 1.374(3)        | C13 C18          | 1.376(4)        |
| N1 C12           | 1.384(3)        | C9 C8            | 1.415(4)        |
| N1 C2            | 1.376(3)        | C9 C19           | 1.364(4)        |
| N1 C13           | 1.431(3)        | C3 C8            | 1.419(4)        |
| C22 N28          | 1.420(2)        | C3 C4            | 1.370(4)        |
| C22 C23          | 1.390(3)        | C31 C32          | 1.402(4)        |
| C22 C27          | 1.385(3)        | C8 C7            | 1.405(3)        |
| C12 C25          | 1.467(3)        | C40 C39          | 1.386(4)        |
| N28 C29          | 1.394(3)        | C35 C34          | 1.387(4)        |
| N28 C36          | 1.403(3)        | C14 C15          | 1.378(4)        |
| C25 C26          | 1.397(3)        | C7 C21           | 1.431(6)        |
| C25 C24          | 1.389(3)        | C7 C6            | 1.395(6)        |
| C26 C27          | 1.381(3)        | C19 C20          | 1.417(4)        |
| C23 C24          | 1.380(3)        | C39 C38          | 1.385(4)        |
| C10 C2           | 1.352(4)        | C18 C17          | 1.388(4)        |
| C10 C9           | 1.474(3)        | C37 C38          | 1.362(4)        |
| C29 C30          | 1.402(3)        | C21 C20          | 1.337(6)        |
| C29 C40          | 1.388(4)        | C16 C17          | 1.366(5)        |
| C2 C3            | 1.462(3)        | C16 C15          | 1.373(5)        |
| C36 C31          | 1.404(3)        | C4 C5            | 1.437(5)        |
| C36 C35          | 1.384(4)        | C5 C6            | 1.371(6)        |
| C30 C31          | 1.431(4)        | C32 C33          | 1.367(5)        |
| C30 C37          | 1.398(4)        | C34 C33          | 1.386(5)        |

**Table ST3:** Bond Angles for AC-1.

| <b>Atom Atom Atom</b> | <b>Angle/°</b> | <b>Atom Atom Atom</b> | <b>Angle/°</b> |
|-----------------------|----------------|-----------------------|----------------|
| C12 N11 C10           | 103.8(2)       | C18 C13 N1            | 120.3(2)       |
| C12 N1 C13            | 129.42(18)     | C18 C13 C14           | 121.2(3)       |
| C2 N1 C12             | 105.41(19)     | C8 C9 C10             | 103.4(2)       |
| C2 N1 C13             | 125.2(2)       | C19 C9 C10            | 137.9(3)       |
| C23 C22 N28           | 119.54(19)     | C19 C9 C8             | 118.7(3)       |
| C27 C22 N28           | 121.26(19)     | C8 C3 C2              | 102.7(2)       |
| C27 C22 C23           | 119.20(19)     | C4 C3 C2              | 137.9(3)       |
| N11 C12 N1            | 112.32(18)     | C4 C3 C8              | 119.4(3)       |
| N11 C12 C25           | 124.1(2)       | C36 C31 C30           | 107.6(2)       |

|     |     |     |            |     |     |     |          |
|-----|-----|-----|------------|-----|-----|-----|----------|
| N1  | C12 | C25 | 123.5(2)   | C32 | C31 | C36 | 119.3(3) |
| C29 | N28 | C22 | 125.31(19) | C32 | C31 | C30 | 133.2(3) |
| C29 | N28 | C36 | 107.91(19) | C9  | C8  | C3  | 113.4(2) |
| C36 | N28 | C22 | 126.6(2)   | C7  | C8  | C9  | 123.5(3) |
| C26 | C25 | C12 | 119.40(19) | C7  | C8  | C3  | 123.1(3) |
| C24 | C25 | C12 | 122.36(19) | C39 | C40 | C29 | 117.9(3) |
| C24 | C25 | C26 | 118.15(19) | C36 | C35 | C34 | 117.3(3) |
| C27 | C26 | C25 | 120.9(2)   | C15 | C14 | C13 | 119.3(3) |
| C24 | C23 | C22 | 120.3(2)   | C8  | C7  | C21 | 115.2(4) |
| C23 | C24 | C25 | 121.1(2)   | C6  | C7  | C8  | 116.7(4) |
| C26 | C27 | C22 | 120.4(2)   | C6  | C7  | C21 | 128.1(3) |
| N11 | C10 | C9  | 138.8(3)   | C9  | C19 | C20 | 118.6(4) |
| C2  | C10 | N11 | 111.8(2)   | C38 | C39 | C40 | 121.2(3) |
| C2  | C10 | C9  | 109.2(2)   | C13 | C18 | C17 | 118.7(3) |
| N28 | C29 | C30 | 109.3(2)   | C38 | C37 | C30 | 119.4(3) |
| C40 | C29 | N28 | 129.4(2)   | C37 | C38 | C39 | 121.0(3) |
| C40 | C29 | C30 | 121.2(2)   | C20 | C21 | C7  | 121.0(3) |
| N1  | C2  | C3  | 142.0(3)   | C17 | C16 | C15 | 120.7(3) |
| C10 | C2  | N1  | 106.6(2)   | C3  | C4  | C5  | 117.5(4) |
| C10 | C2  | C3  | 111.3(2)   | C6  | C5  | C4  | 122.5(4) |
| N28 | C36 | C31 | 108.4(2)   | C21 | C20 | C19 | 123.0(4) |
| C35 | C36 | N28 | 129.9(2)   | C33 | C32 | C31 | 119.0(3) |
| C35 | C36 | C31 | 121.7(2)   | C16 | C17 | C18 | 120.3(3) |
| C29 | C30 | C31 | 106.8(2)   | C33 | C34 | C35 | 121.8(4) |
| C37 | C30 | C29 | 119.3(3)   | C16 | C15 | C14 | 119.8(3) |
| C37 | C30 | C31 | 133.9(3)   | C5  | C6  | C7  | 120.8(3) |
| C14 | C13 | N1  | 118.5(2)   | C32 | C33 | C34 | 120.9(3) |

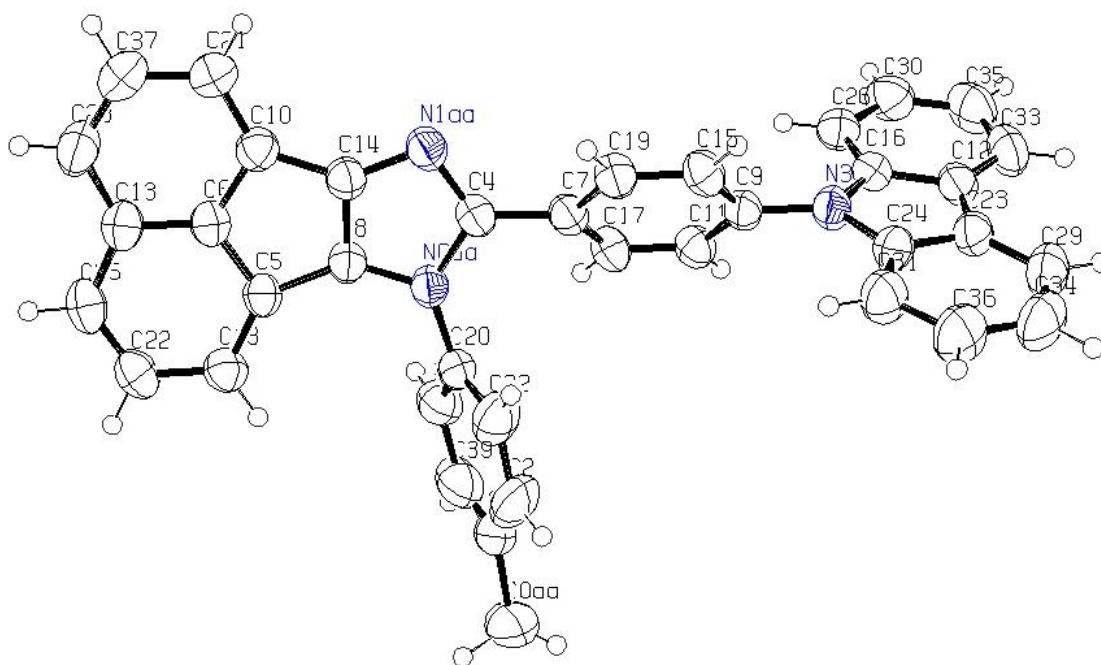

**Fig. S2.** ORTEP Diagram of AC-2 (eclipsed form 50% probability). N atoms blue in color.

**Table ST4:** Bond Lengths for AC-2.

| Atom | Atom | Length/Å | Atom | Atom | Length/Å |
|------|------|----------|------|------|----------|
| N0AA | C4   | 1.388(3) | C13  | C25  | 1.423(3) |
| N0AA | C8   | 1.368(3) | C13  | C28  | 1.416(3) |
| N0AA | C20  | 1.431(3) | C15  | C19  | 1.382(3) |
| N1AA | C4   | 1.330(3) | C16  | C26  | 1.388(3) |
| N1AA | C14  | 1.377(3) | C18  | C22  | 1.414(3) |
| N3   | C9   | 1.424(3) | C20  | C27  | 1.373(3) |
| N3   | C16  | 1.390(3) | C20  | C32  | 1.369(3) |
| N3   | C24  | 1.396(3) | C21  | C37  | 1.418(4) |
| C4   | C7   | 1.473(3) | C22  | C25  | 1.359(3) |
| C5   | C6   | 1.423(3) | C23  | C24  | 1.401(3) |
| C5   | C8   | 1.459(3) | C23  | C29  | 1.400(3) |
| C5   | C18  | 1.367(3) | C24  | C31  | 1.382(3) |
| C6   | C10  | 1.423(3) | C26  | C30  | 1.379(3) |



|     |     |          |     |      |          |
|-----|-----|----------|-----|------|----------|
| C6  | C13 | 1.393(3) | C27 | C39  | 1.381(4) |
| C7  | C17 | 1.391(3) | C28 | C37  | 1.366(4) |
| C7  | C19 | 1.391(3) | C29 | C34  | 1.365(4) |
| C8  | C14 | 1.369(3) | C30 | C35  | 1.386(4) |
| C9  | C11 | 1.382(3) | C31 | C36  | 1.383(3) |
| C9  | C15 | 1.384(3) | C32 | C2   | 1.386(5) |
| C10 | C14 | 1.466(3) | C33 | C35  | 1.378(4) |
| C10 | C21 | 1.367(3) | C34 | C36  | 1.386(4) |
| C11 | C17 | 1.378(3) | C39 | C1   | 1.361(6) |
| C12 | C16 | 1.404(3) | C1  | C2   | 1.371(6) |
| C12 | C23 | 1.440(3) | C1  | C0AA | 1.523(5) |
| C12 | C33 | 1.391(3) |     |      |          |

**Table ST5:** Bond Angles for AC-2.

| <b>Atom</b> | <b>Atom</b> | <b>Atom</b> | <b>Angle/°</b> | <b>Atom</b> | <b>Atom</b> | <b>Atom</b> | <b>Angle/°</b> |
|-------------|-------------|-------------|----------------|-------------|-------------|-------------|----------------|
| C4          | N0AA        | C20         | 129.74(18)     | C8          | C14         | C10         | 108.64(19)     |
| C8          | N0AA        | C4          | 105.66(17)     | C19         | C15         | C9          | 119.8(2)       |
| C8          | N0AA        | C20         | 124.39(17)     | N3          | C16         | C12         | 109.16(19)     |
| C4          | N1AA        | C14         | 104.36(18)     | C26         | C16         | N3          | 129.0(2)       |
| C16         | N3          | C9          | 125.35(17)     | C26         | C16         | C12         | 121.9(2)       |
| C16         | N3          | C24         | 108.13(18)     | C11         | C17         | C7          | 120.4(2)       |
| C24         | N3          | C9          | 126.41(18)     | C5          | C18         | C22         | 118.4(2)       |
| N0AA        | C4          | C7          | 122.64(19)     | C15         | C19         | C7          | 120.9(2)       |
| N1AA        | C4          | N0AA        | 112.21(19)     | C27         | C20         | N0AA        | 118.7(2)       |
| N1AA        | C4          | C7          | 125.10(19)     | C32         | C20         | N0AA        | 120.8(2)       |
| C6          | C5          | C8          | 102.76(18)     | C32         | C20         | C27         | 120.3(2)       |
| C18         | C5          | C6          | 119.0(2)       | C10         | C21         | C37         | 118.4(2)       |
| C18         | C5          | C8          | 138.1(2)       | C25         | C22         | C18         | 122.6(2)       |
| C5          | C6          | C10         | 113.0(2)       | C24         | C23         | C12         | 107.10(19)     |
| C13         | C6          | C5          | 123.1(2)       | C29         | C23         | C12         | 134.0(2)       |
| C13         | C6          | C10         | 123.8(2)       | C29         | C23         | C24         | 118.9(2)       |
| C17         | C7          | C4          | 120.67(19)     | N3          | C24         | C23         | 108.9(2)       |
| C17         | C7          | C19         | 118.7(2)       | C31         | C24         | N3          | 129.1(2)       |
| C19         | C7          | C4          | 120.63(19)     | C31         | C24         | C23         | 122.0(2)       |
| N0AA        | C8          | C5          | 141.61(19)     | C22         | C25         | C13         | 120.7(2)       |
| N0AA        | C8          | C14         | 106.81(19)     | C30         | C26         | C16         | 117.7(2)       |
| C14         | C8          | C5          | 111.48(19)     | C20         | C27         | C39         | 118.9(3)       |
| C11         | C9          | N3          | 119.4(2)       | C37         | C28         | C13         | 120.0(2)       |

|      |     |      |            |     |     |      |          |
|------|-----|------|------------|-----|-----|------|----------|
| C11  | C9  | C15  | 119.6(2)   | C34 | C29 | C23  | 119.2(3) |
| C15  | C9  | N3   | 121.02(19) | C26 | C30 | C35  | 121.3(3) |
| C6   | C10 | C14  | 104.08(19) | C24 | C31 | C36  | 117.5(3) |
| C21  | C10 | C6   | 118.3(2)   | C20 | C32 | C2   | 118.9(3) |
| C21  | C10 | C14  | 137.6(2)   | C35 | C33 | C12  | 119.3(2) |
| C17  | C11 | C9   | 120.6(2)   | C29 | C34 | C36  | 121.0(3) |
| C16  | C12 | C23  | 106.7(2)   | C33 | C35 | C30  | 120.9(3) |
| C33  | C12 | C16  | 118.9(2)   | C31 | C36 | C34  | 121.4(3) |
| C33  | C12 | C23  | 134.4(2)   | C28 | C37 | C21  | 123.0(2) |
| C6   | C13 | C25  | 116.0(2)   | C1  | C39 | C27  | 122.4(4) |
| C6   | C13 | C28  | 116.3(2)   | C39 | C1  | C2   | 117.4(3) |
| C28  | C13 | C25  | 127.6(2)   | C39 | C1  | C0AA | 122.8(5) |
| N1AA | C14 | C10  | 140.4(2)   | C2  | C1  | C0AA | 119.8(5) |
| C8   | C14 | N1AA | 110.95(19) | C1  | C2  | C32  | 121.9(3) |

### NMR Spectroscopy:

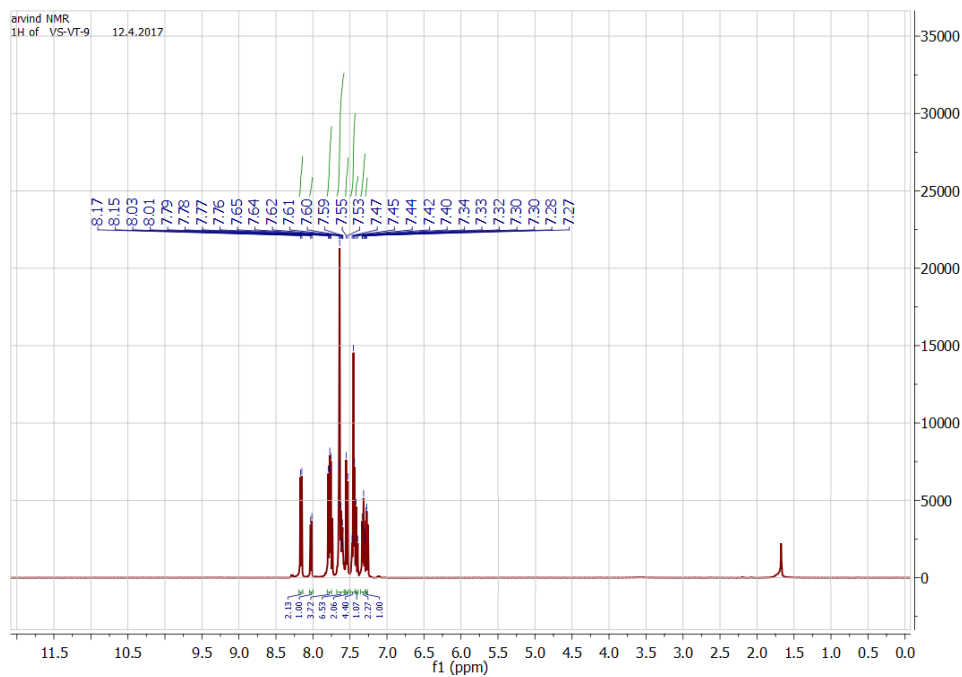

**Fig. S3.** <sup>1</sup>H-NMR spectra of AC-1.

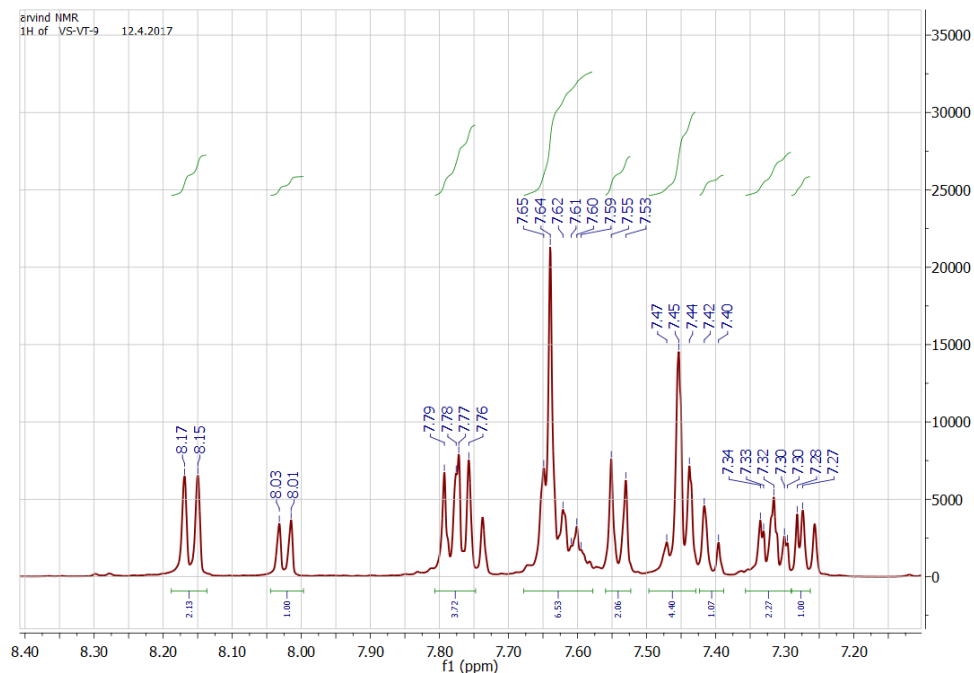

**Fig. S4.**  $^1\text{H}$ -NMR spectra of AC-1 (expanded).

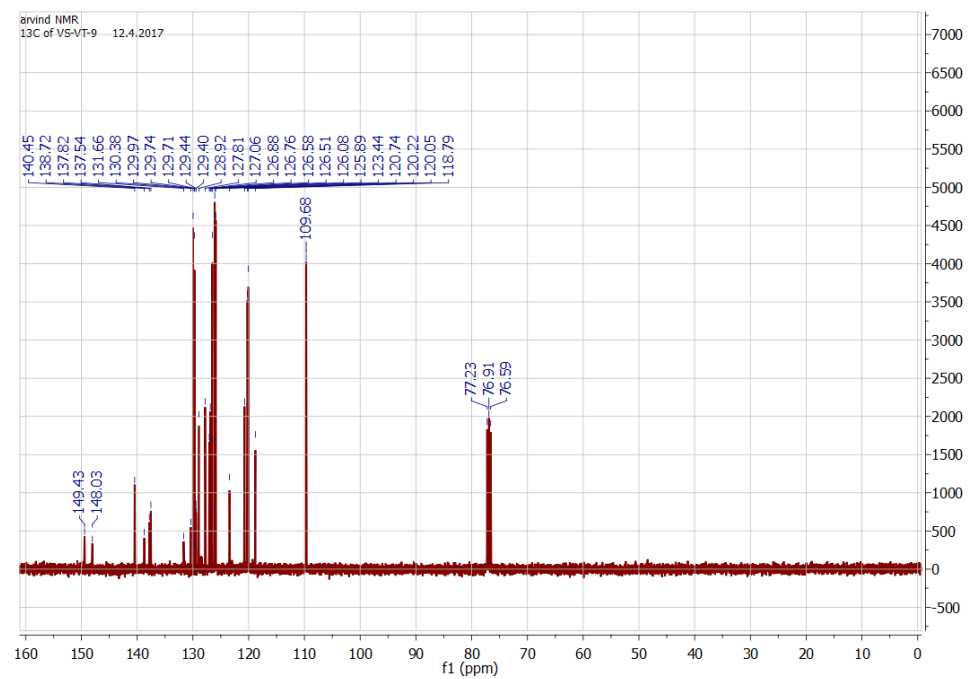

**Fig. S5.**  $^{13}\text{C}$ -NMR spectra of AC-1.

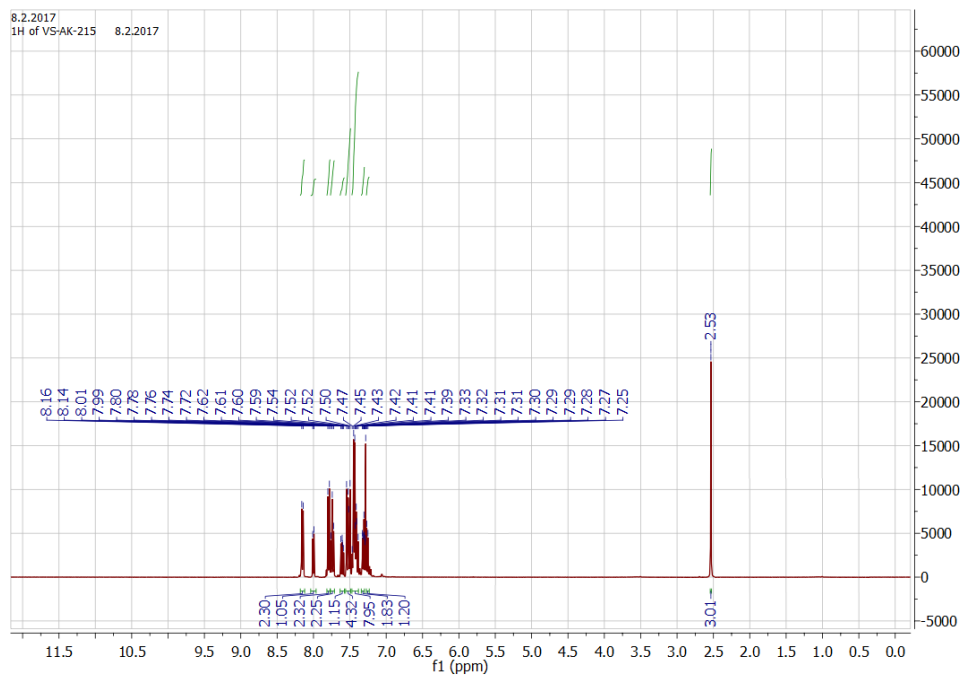

**Fig. S6.**  $^1\text{H}$ -NMR spectra of AC-2.

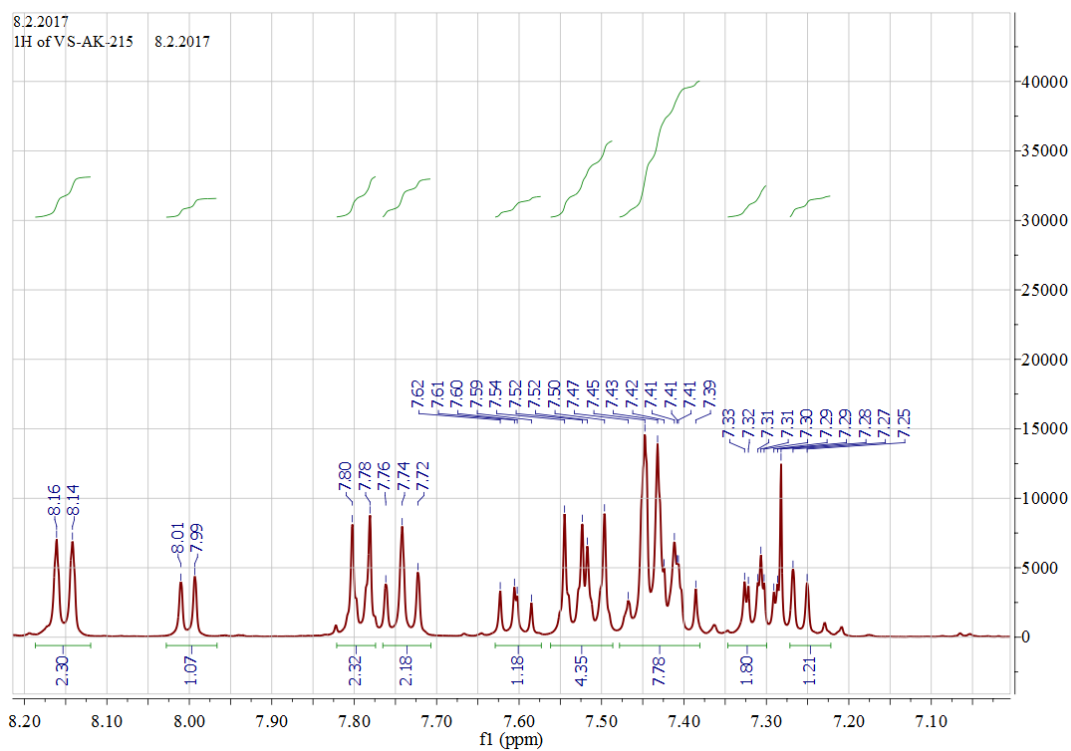

**Fig. S7.**  $^1\text{H}$ -NMR spectra of AC-2 (expanded).

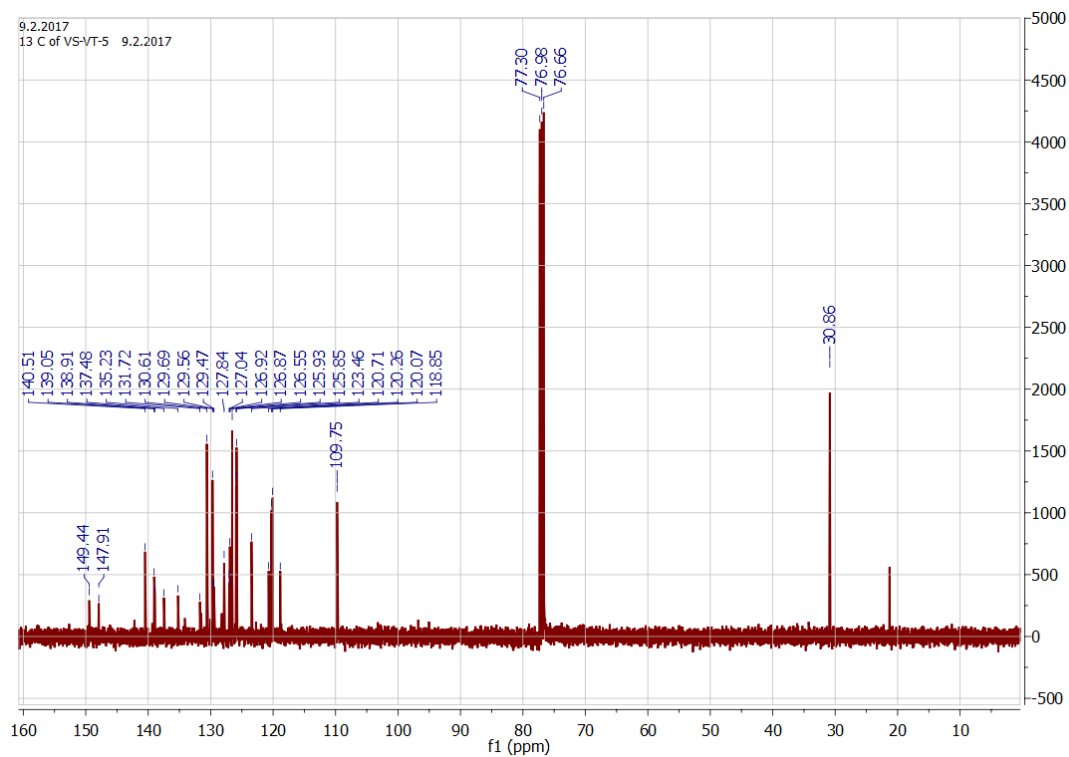

**Fig. S8.**  $^{13}\text{C}$ -NMR spectra of AC-2.

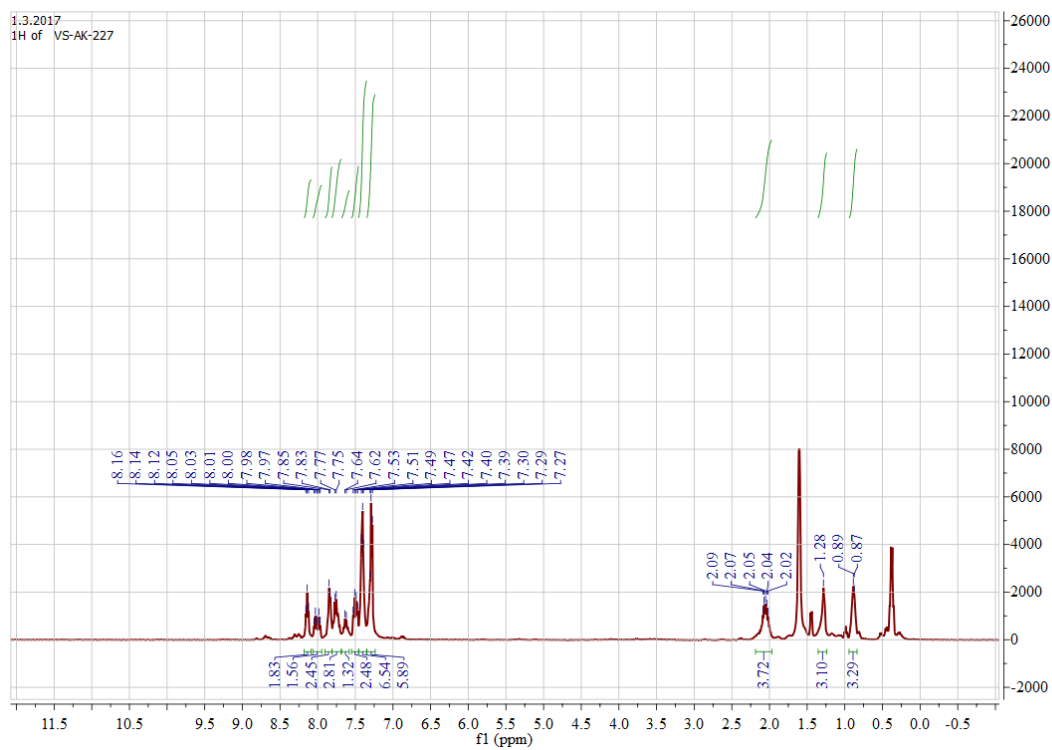

**Fig. S9.**  $^1\text{H}$ -NMR spectra of AC-3.

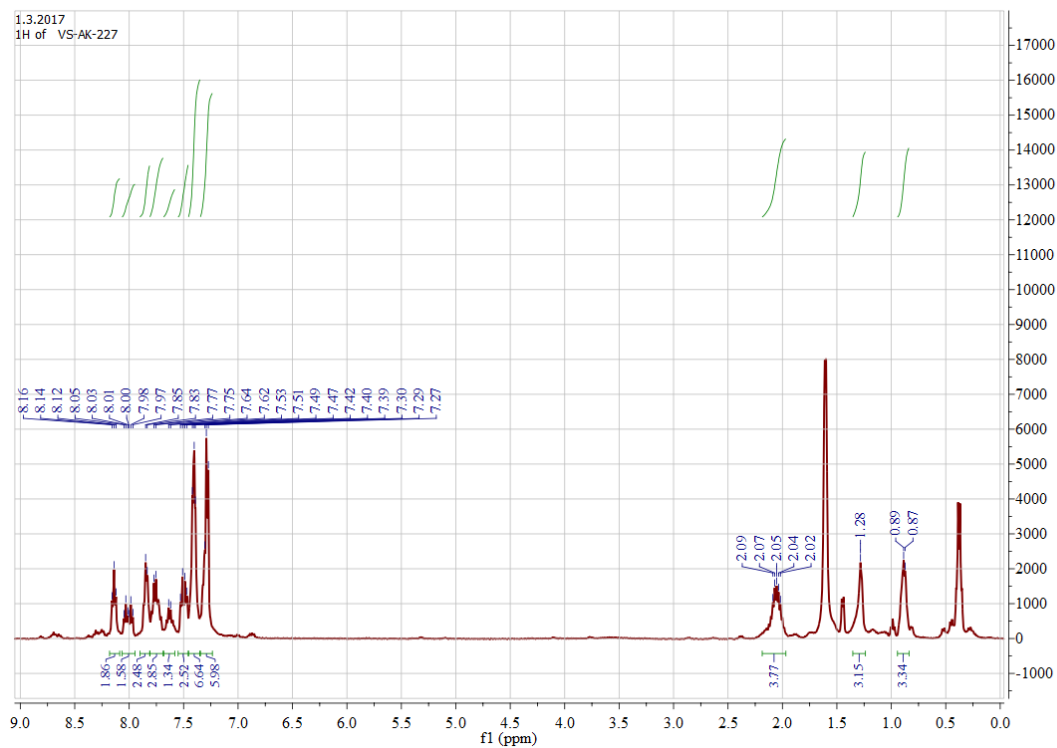

**Fig. S10.**  $^1\text{H}$ -NMR spectra of AC-3 (expanded).

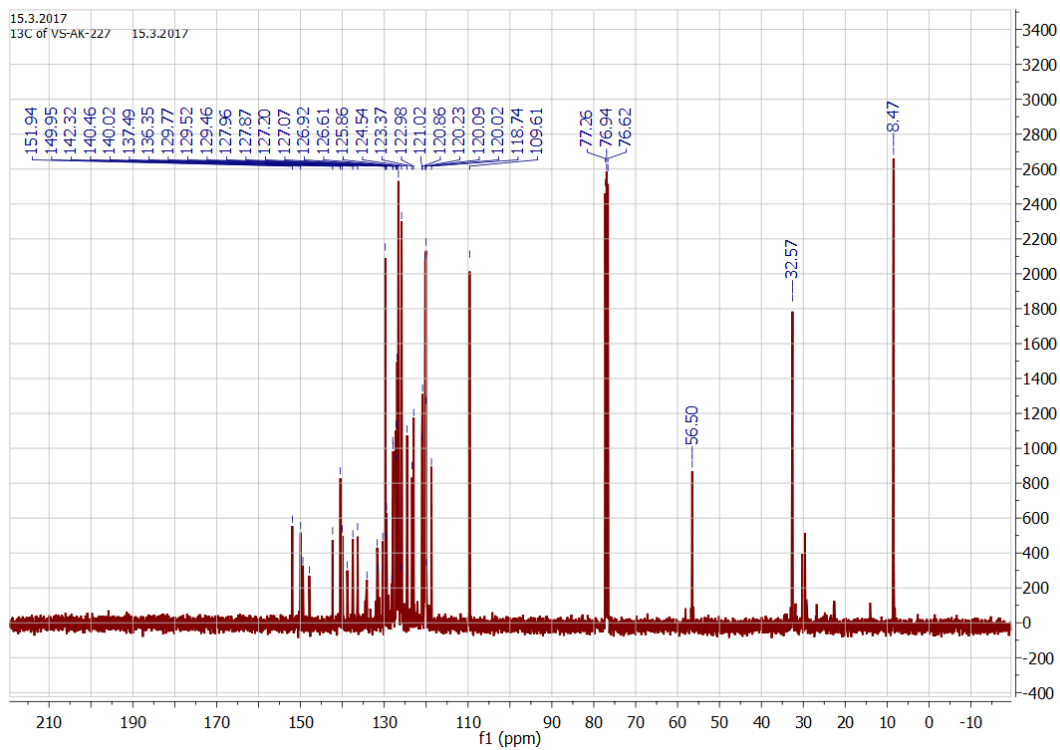

**Fig. S11.**  $^{13}\text{C}$ -NMR spectra of AC-3.

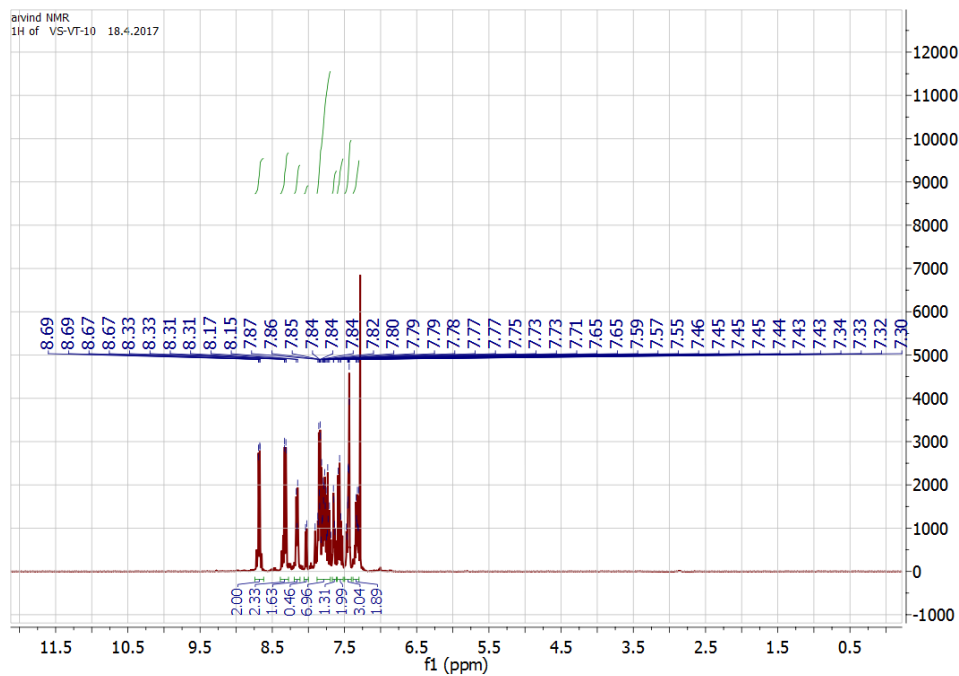

Fig. S12. <sup>1</sup>H-NMR spectra of AC-4.

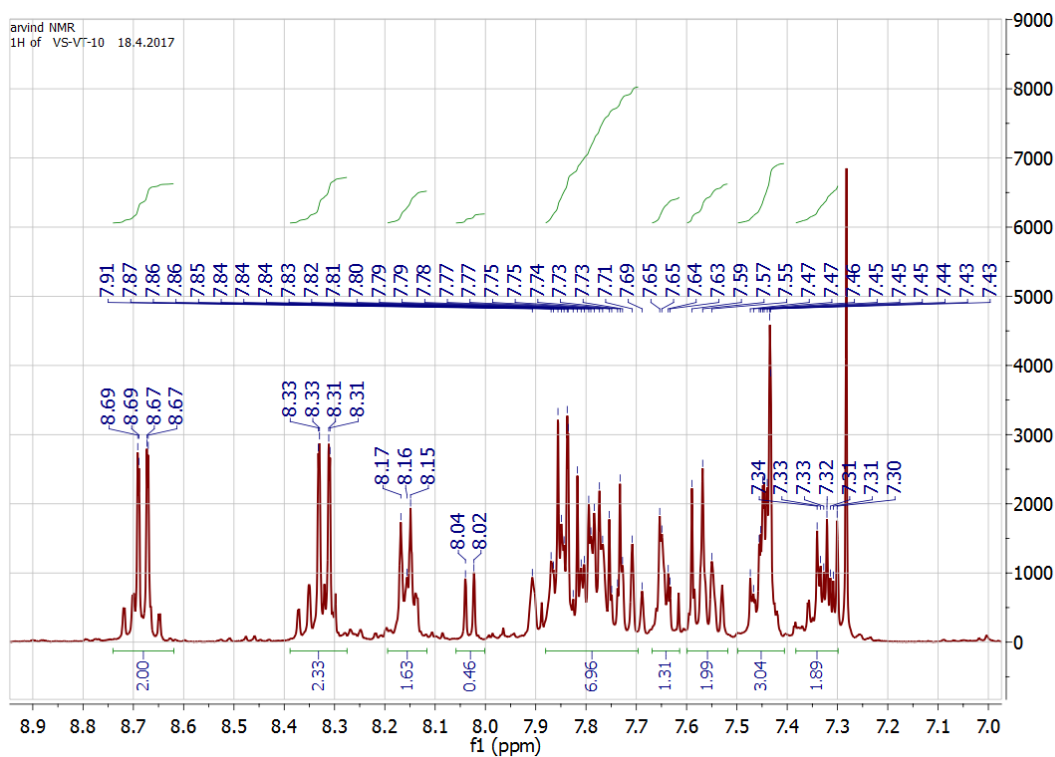

Fig. S13. <sup>1</sup>H-NMR spectra of AC-4 (expanded).

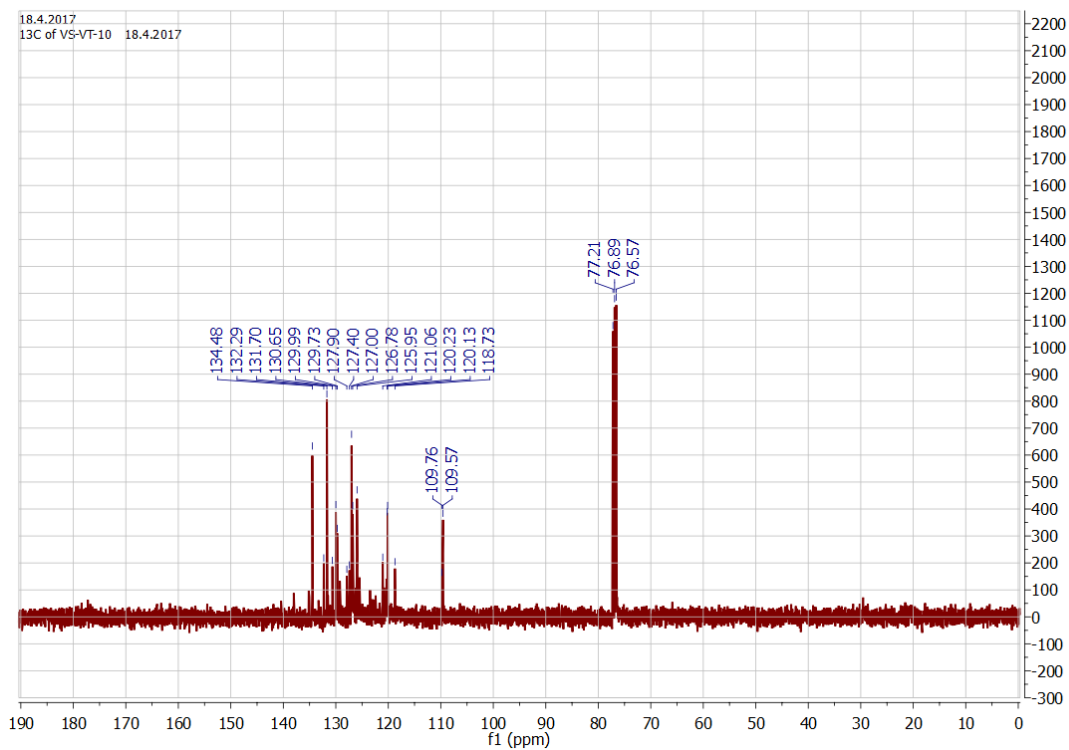

Fig. S14.  $^{13}\text{C}$ -NMR spectra of AC-4.

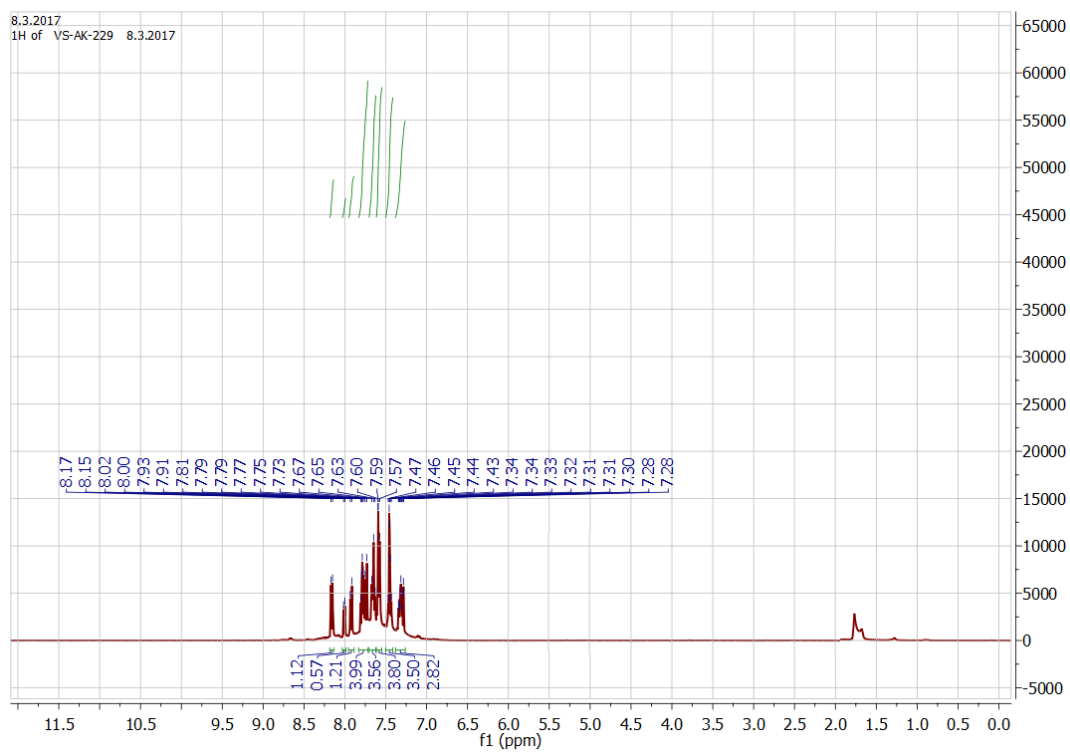

Fig. S15.  $^1\text{H}$ -NMR spectra of AC-5.



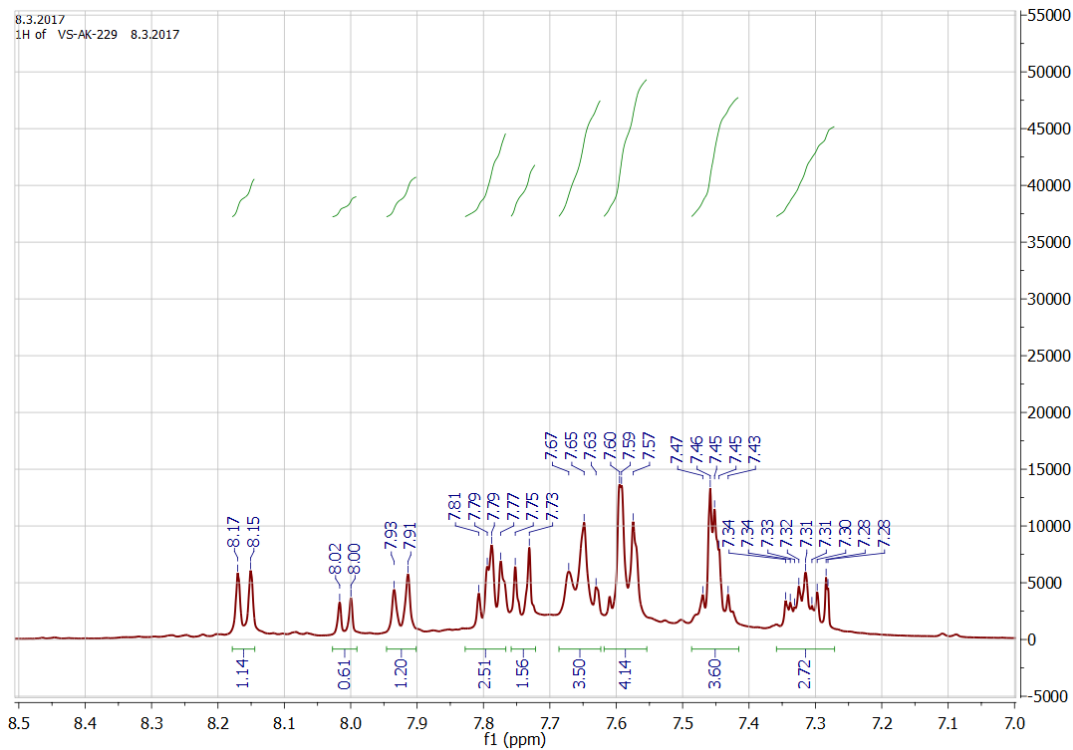

**Fig. S16.**  $^1\text{H}$ -NMR spectra of AC-5 (expanded).

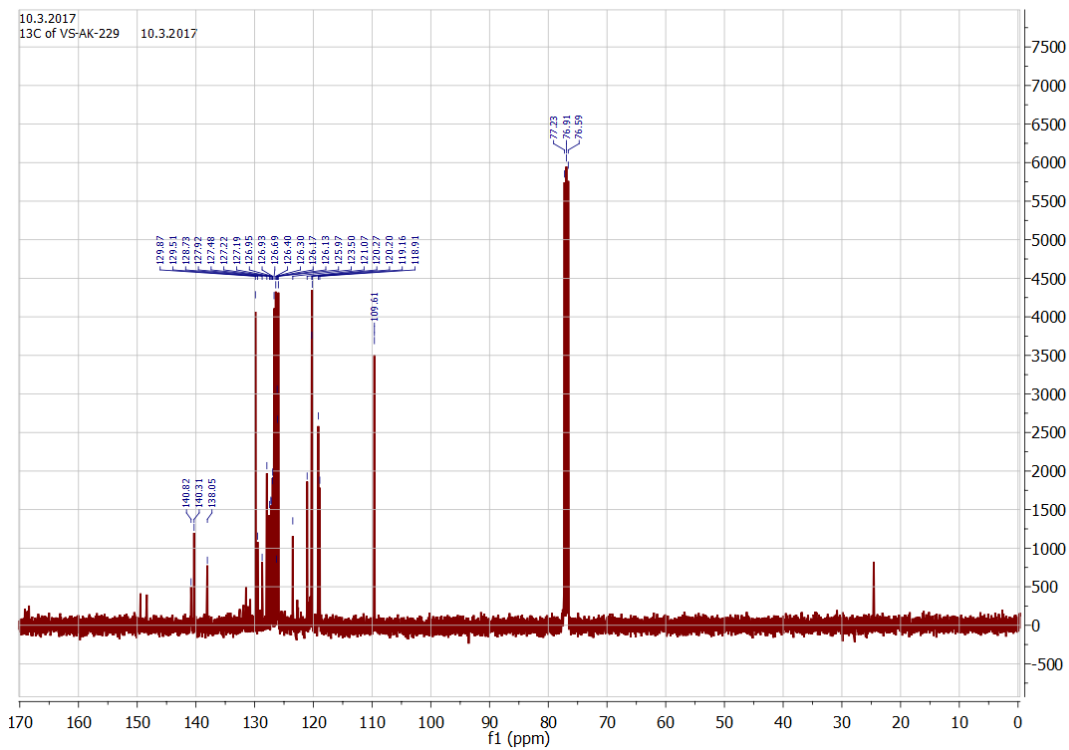

**Fig. S17.**  $^{13}\text{C}$ -NMR spectra of AC-5.

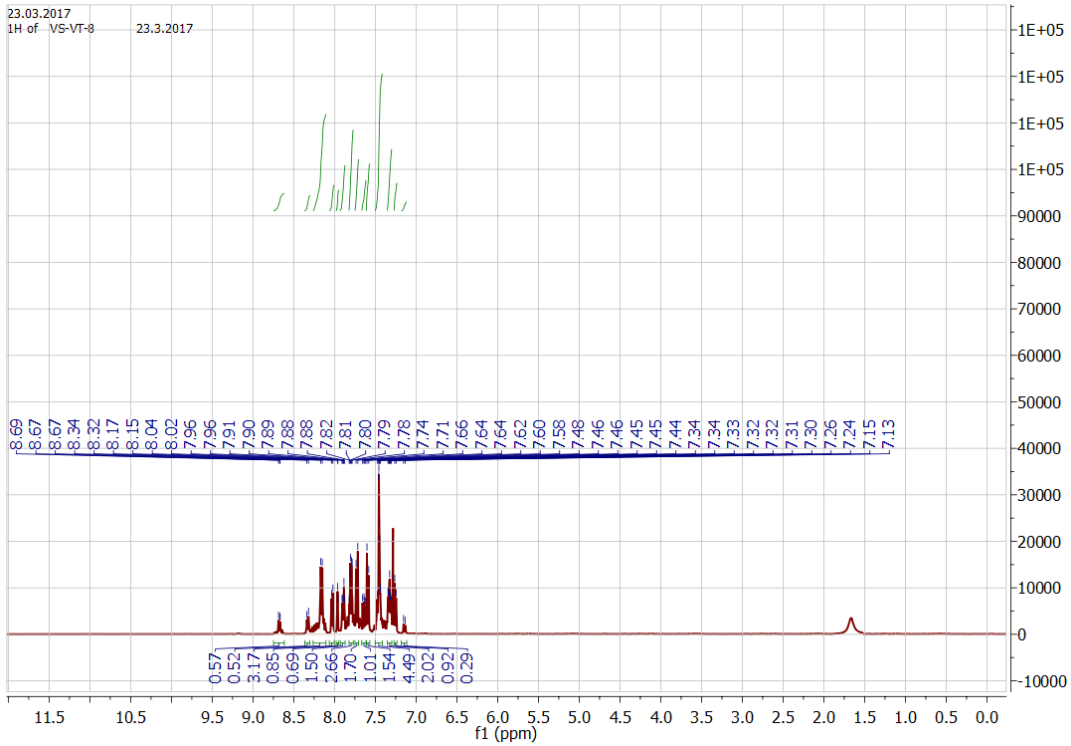

**Fig. S18.**  $^1\text{H-NMR}$  spectra of AC-6.

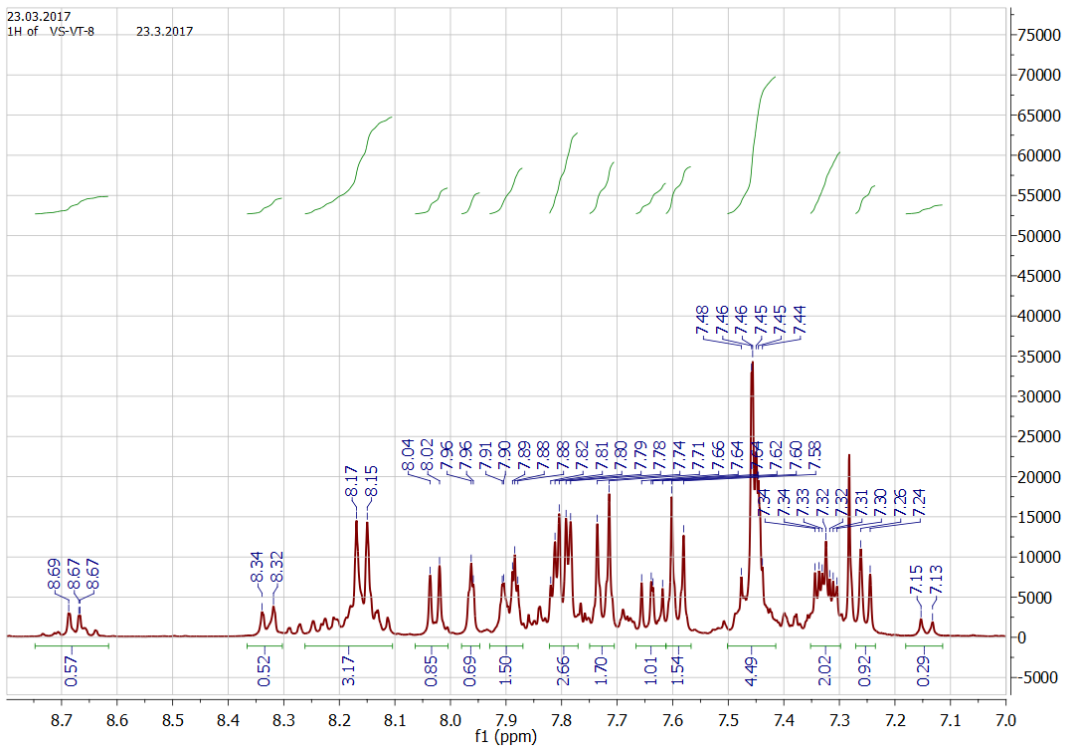

**Fig. S19.**  $^1\text{H-NMR}$  spectra of AC-6 (expanded).

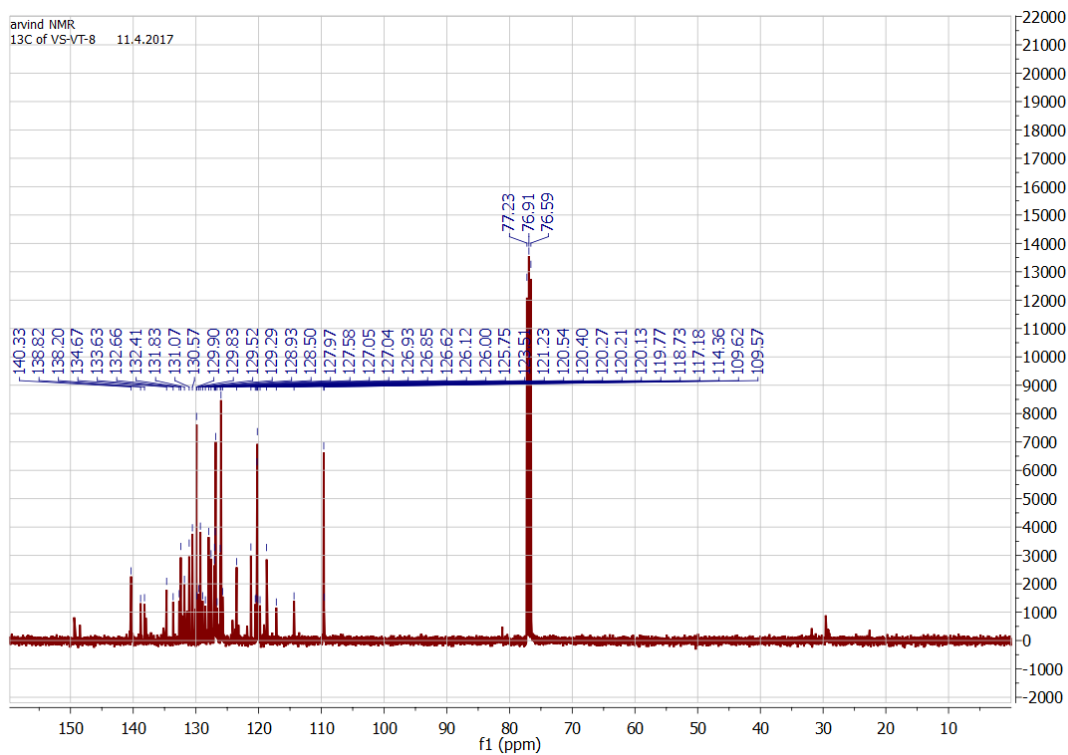

Fig. S20.  $^{13}\text{C}$ -NMR spectra of AC-6.

Mass spectral analysis:

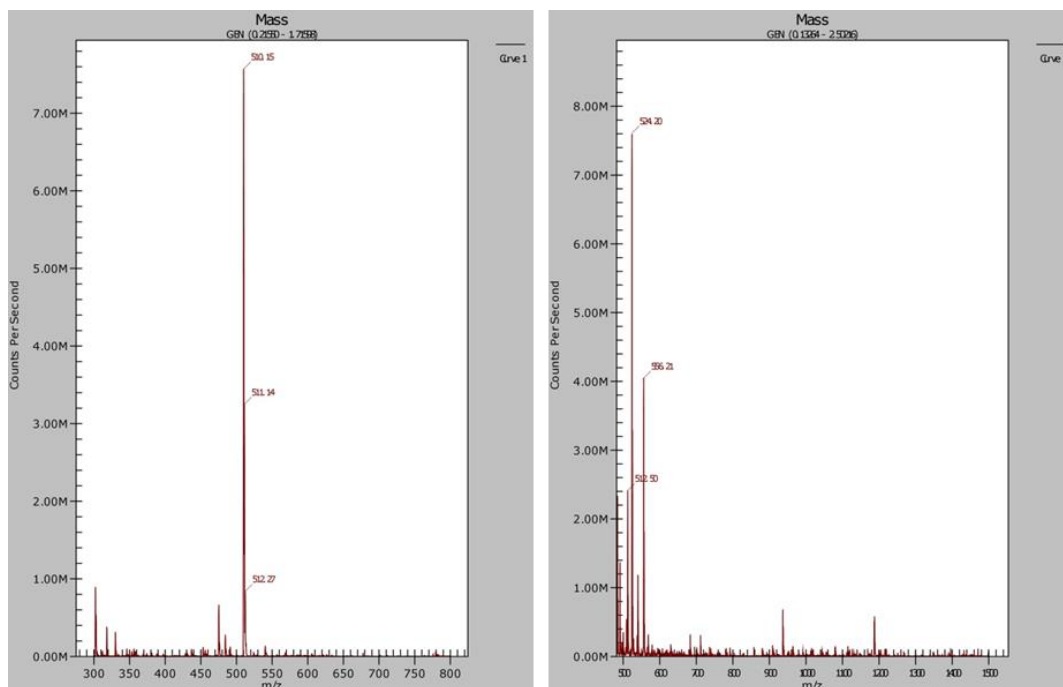

Fig. S21. Mass spectra of AC-1 and AC-2.

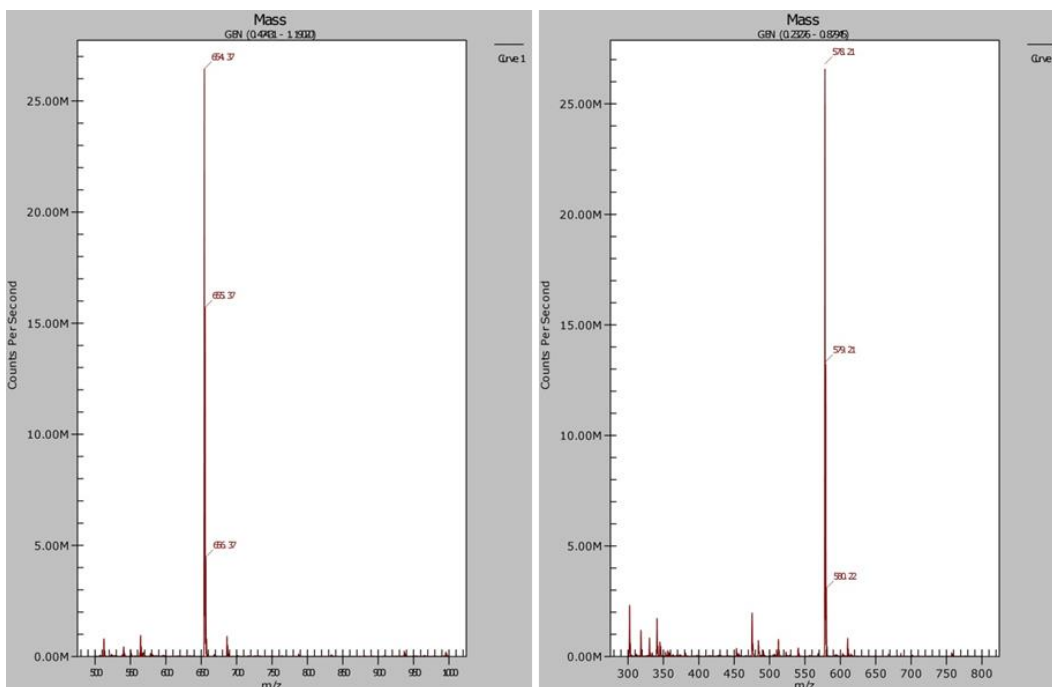

Fig. S22. Mass spectra of AC-3 and AC-4.

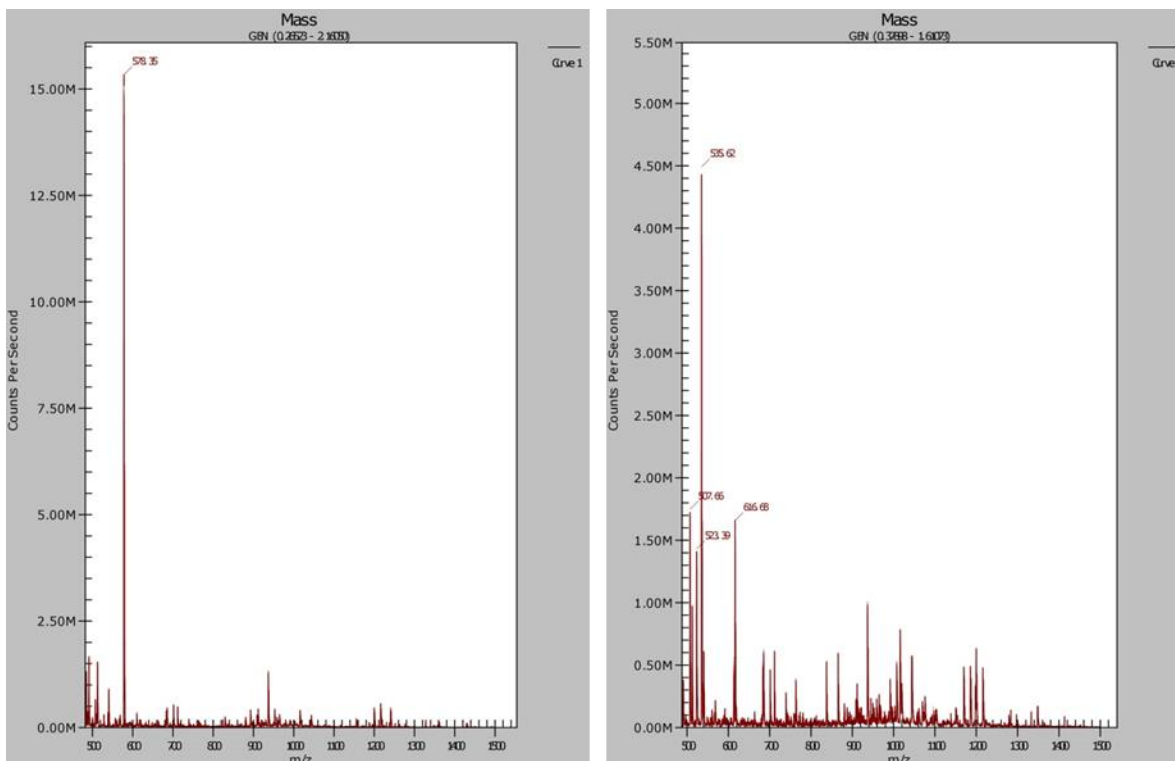

Fig. S23. Mass spectra of AC-5 and AC-6.

**Chemosensors:**

**UV-Vis titrations:**

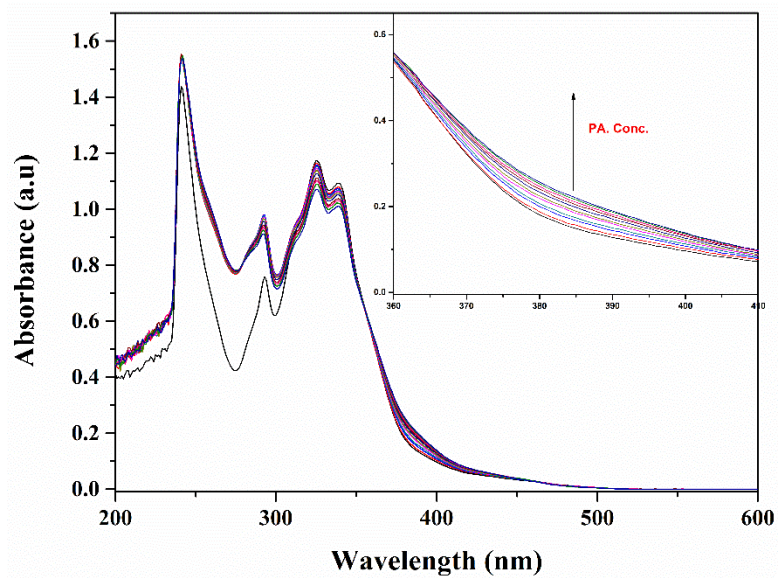

**Fig. S24.** UV-visible absorption responses of AC-1(5 mM) toward different concentrations of PA in THF (0–15 equivalents).

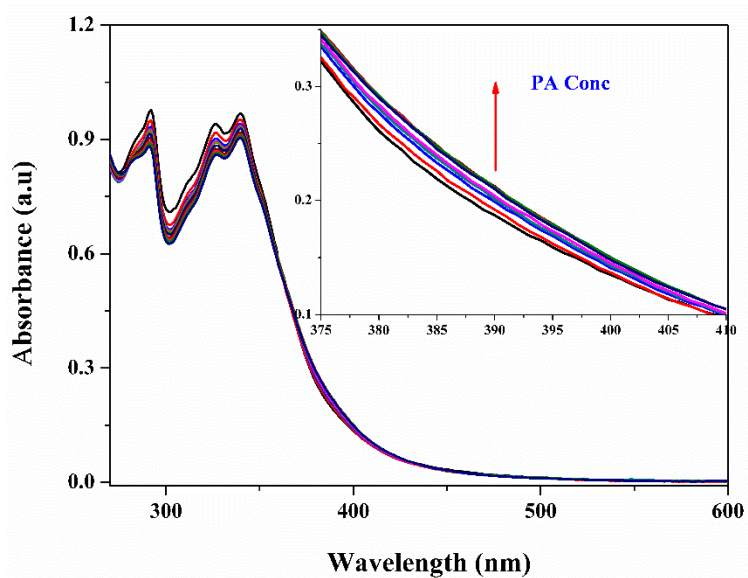

**Fig. S25.** UV-visible absorption responses of AC-2 (5 mM) toward different concentrations of PA in THF (0–15 equivalents).

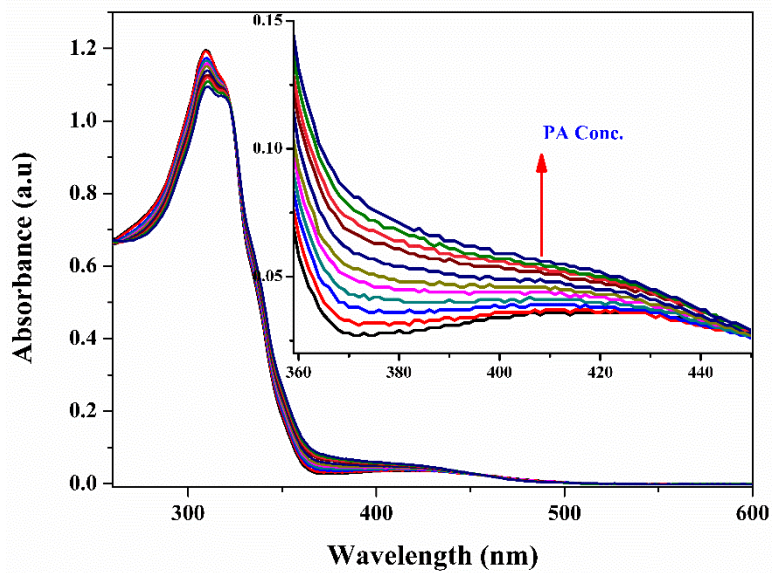

**Fig. S26.** UV-visible absorption responses of AC-3 (5 mM) toward different concentrations of PA in THF (0–15 equivalents).

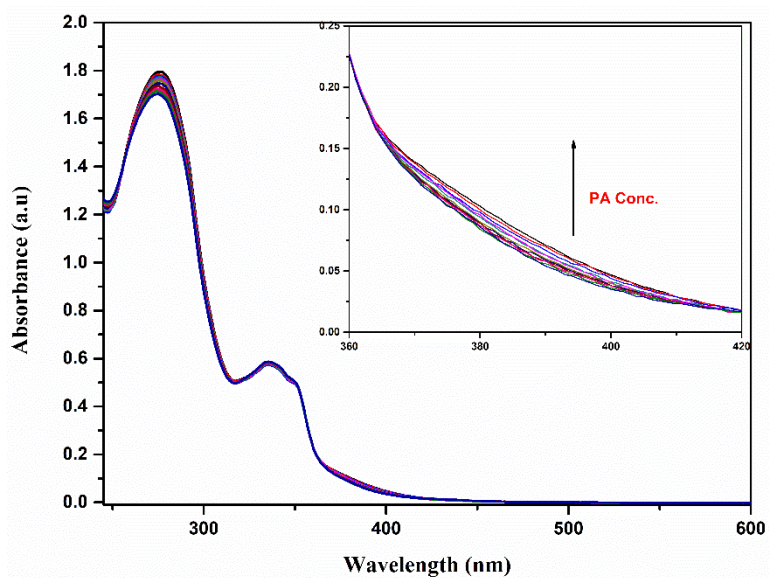

**Fig. S27.** UV-visible absorption responses of AC-4 (5 mM) toward different concentrations of PA in THF (0–15 equivalents).

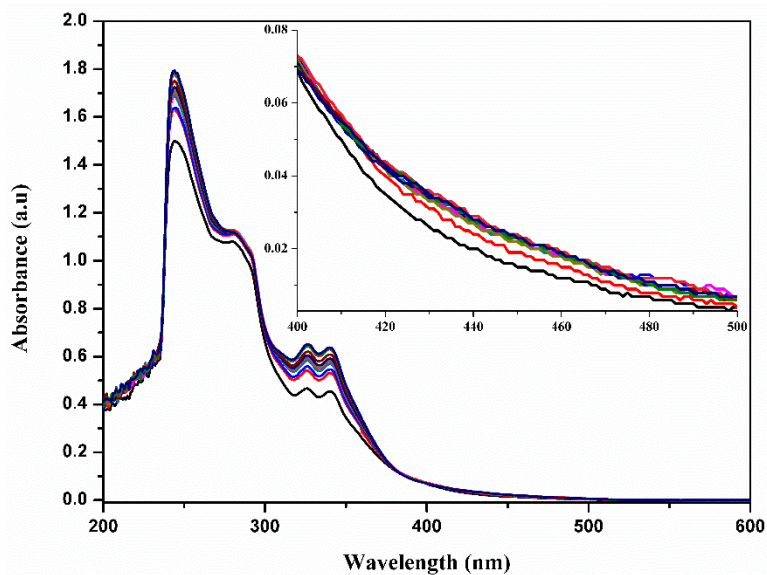

**Fig. S28.** UV-visible absorption responses of AC-5 (5 mM) toward different concentrations of PA in THF (0–15 equivalents).

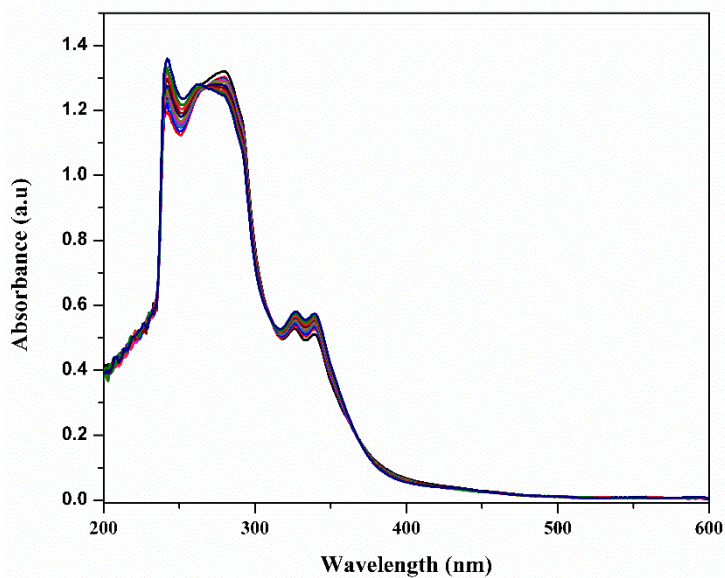

**Fig. S29.** UV-visible absorption responses of AC-6 (5 mM) toward different concentrations of PA in THF (0–15 equivalents).

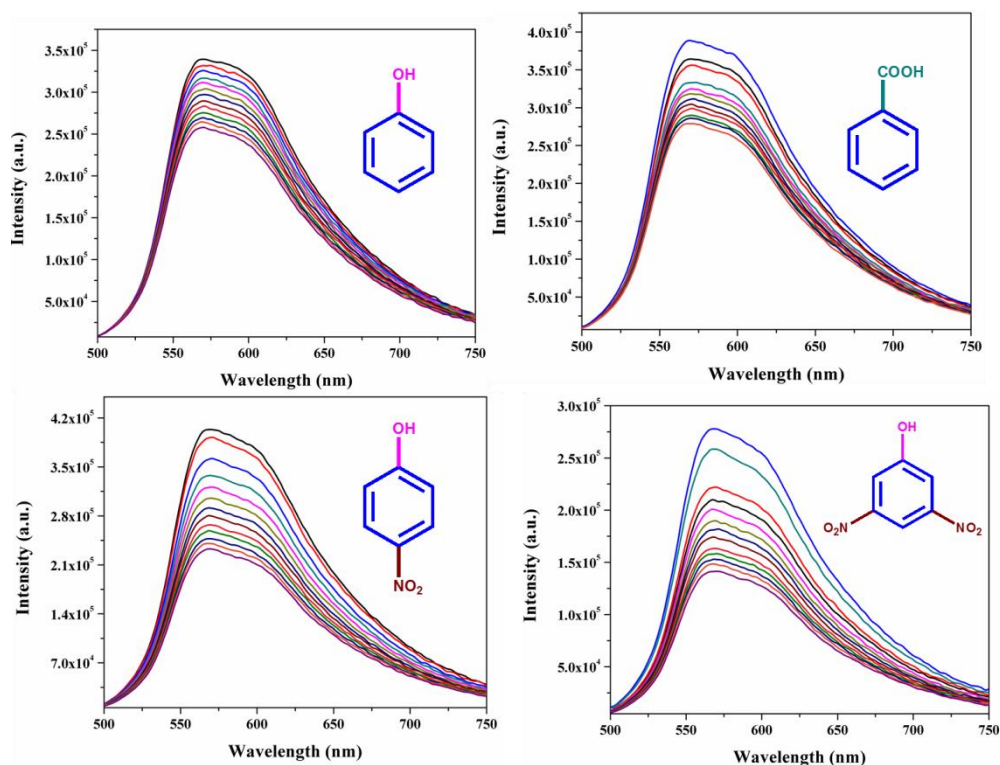

**Fig. S30.** The fluorescence spectra of different nitroaromatics to AC-1 in THF. Upon addition of (a) 2,4-Dinitrophenol (2,4-DNP), (b) 4-nitro phenol(NP), (c) benzoic acid (BA), (d) phenol (PH).

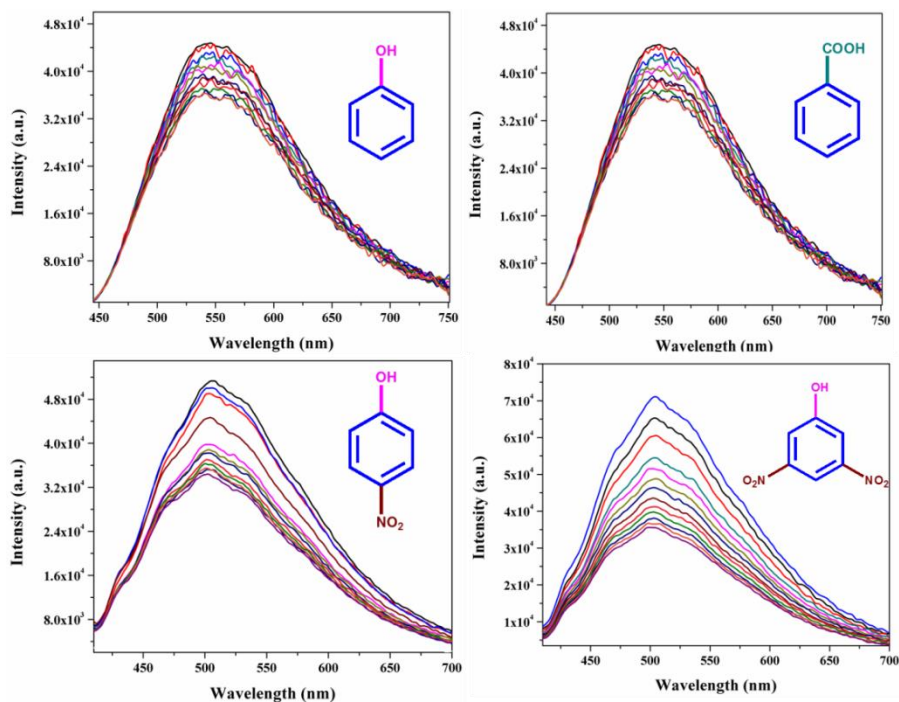

**Fig. S31.** The fluorescence spectra of different nitroaromatics to AC-2 in THF. Upon addition of (a) 2,4-Dinitrophenol (2,4-DNP), (b) 4-nitro phenol(NP), (c) benzoic acid (BA), (d) phenol (PH).



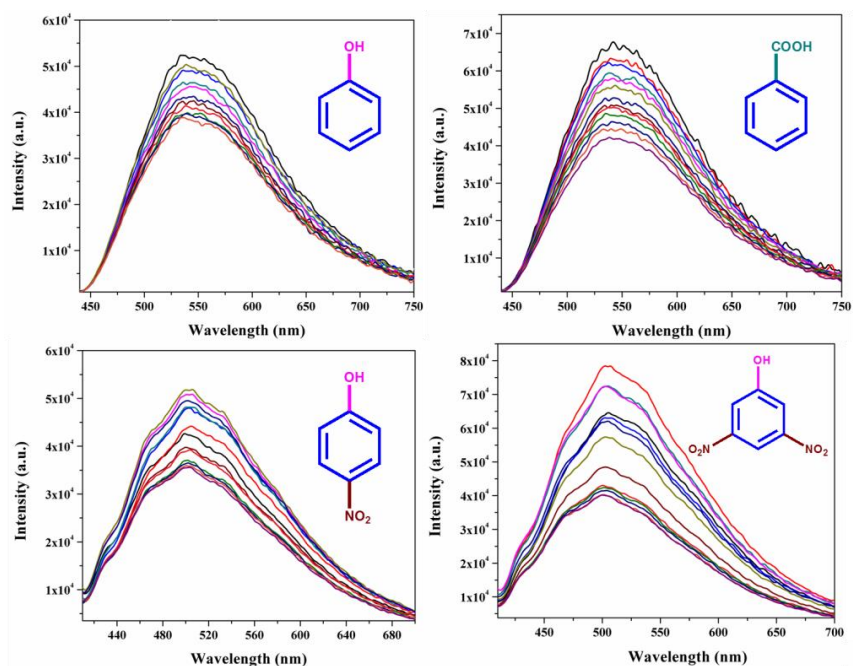

**Fig. S32.** The fluorescence spectra of different nitroaromatics to AC-3 in THF. Upon addition of (a) 2,4-Dinitrophenol (2,4-DNP), (b) 4-nitro phenol(NP), (c) benzoic acid (BA), (d) phenol (PH).

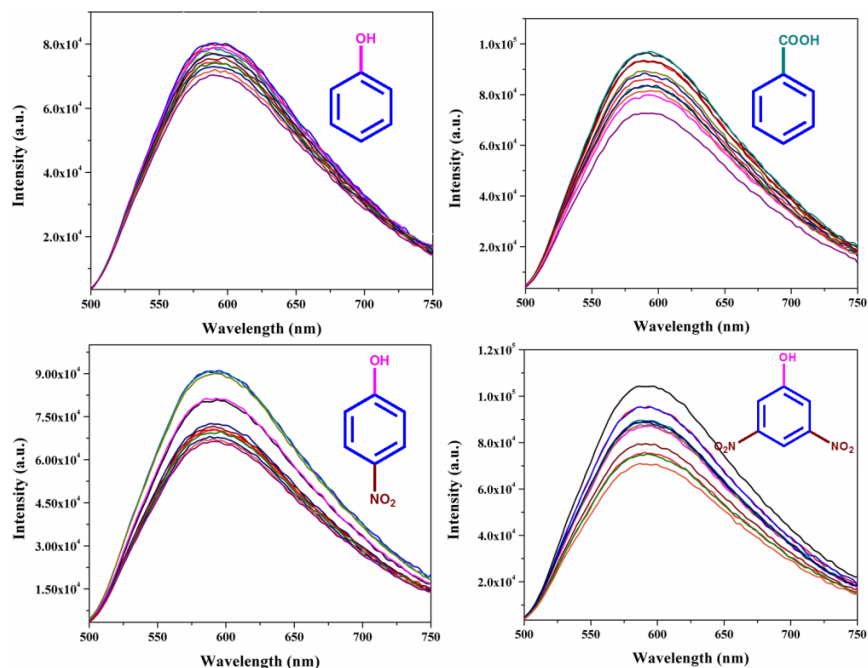

**Fig. S33.** The fluorescence spectra of different nitroaromatics to AC-5 in THF. Upon addition of (a) 2,4-Dinitrophenol (2,4-DNP), (b) 4-nitro phenol(NP), (c) benzoic acid (BA), (d) phenol (PH).

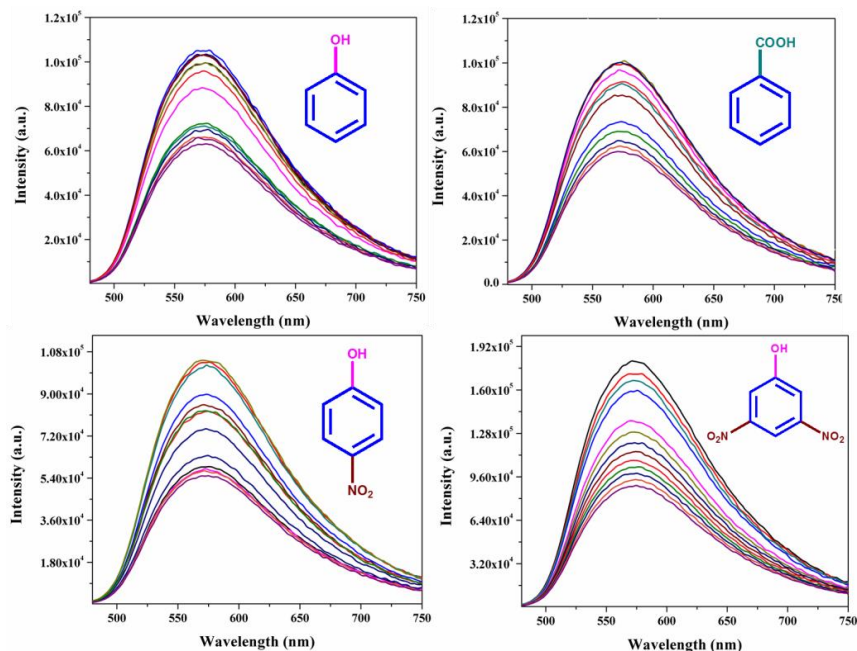

**Fig. S34.** The fluorescence spectra of different nitroaromatics to AC-6 in THF. Upon addition of (a) 2,4-Dinitrophenol (2,4-DNP), (b) 4-nitro phenol(NP), (c) benzoic acid (BA), (d) phenol (PH).1

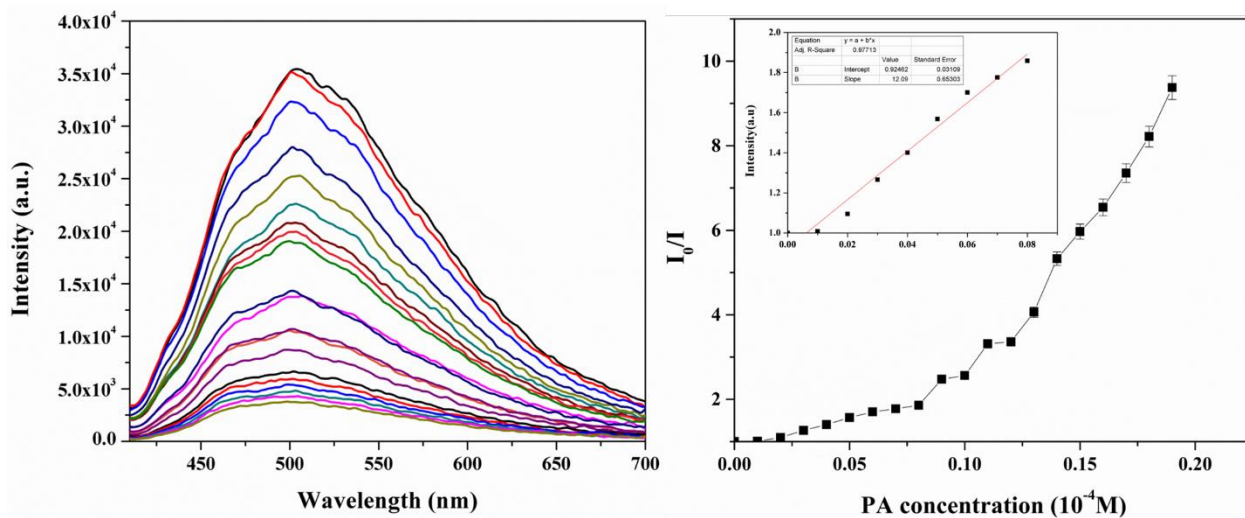

**Fig. S35.** Change in the fluorescence of AC-2 upon the addition of PA. b) Stern–Volmer plots of AC-1 using PA as a quencher. Inset: Stern–Volmer plots at lower concentration region of PA.

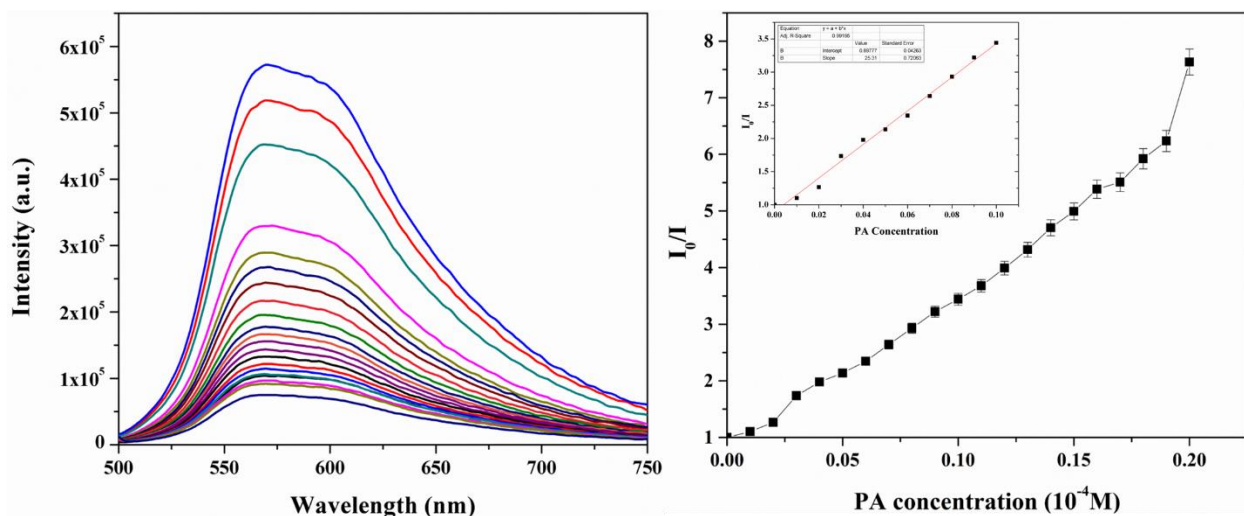

**Fig. S36.** Change in the fluorescence of AC-3 upon the addition of PA. b) Stern–Volmer plots of AC-3 using PA as a quencher. Inset: Stern–Volmer plots at lower concentration region of PA.

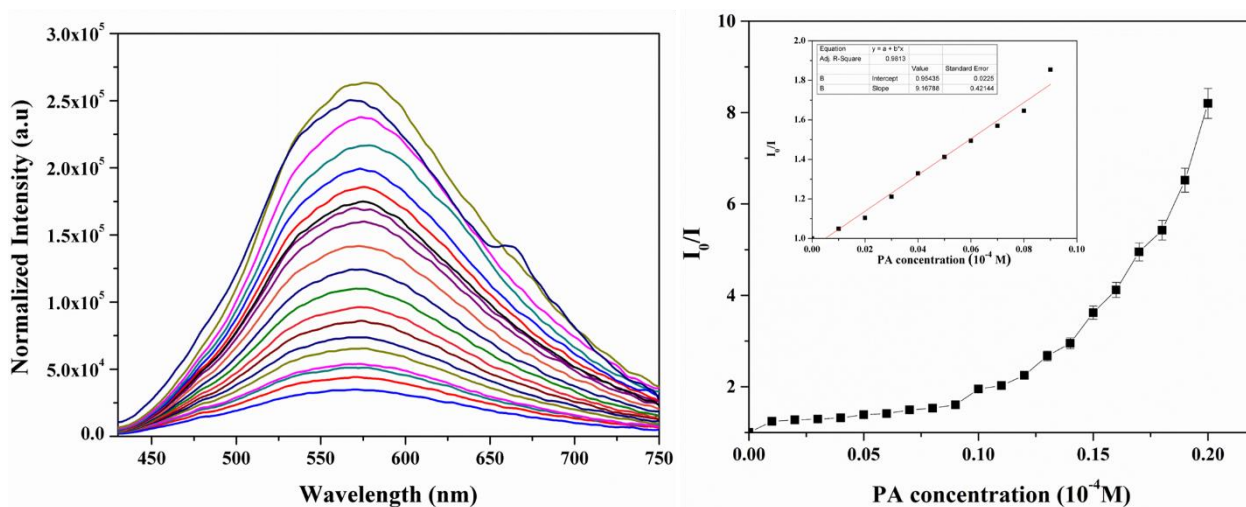

**Fig. S37.** Change in the fluorescence of AC-4 upon the addition of PA. b) Stern–Volmer plots of AC-3 using PA as a quencher. Inset: Stern–Volmer plots at lower concentration region of PA.

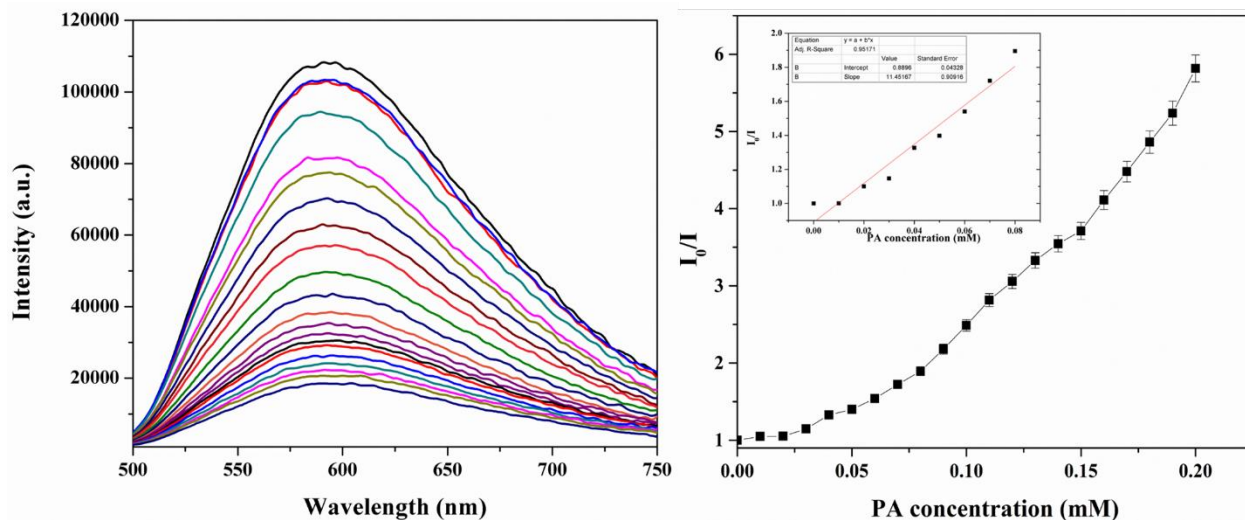

**Fig. S38.** Change in the fluorescence of AC-5 upon the addition of PA. b) Stern–Volmer plots of AC-6 using PA as a quencher. Inset: Stern–Volmer plots at lower concentration region of PA.

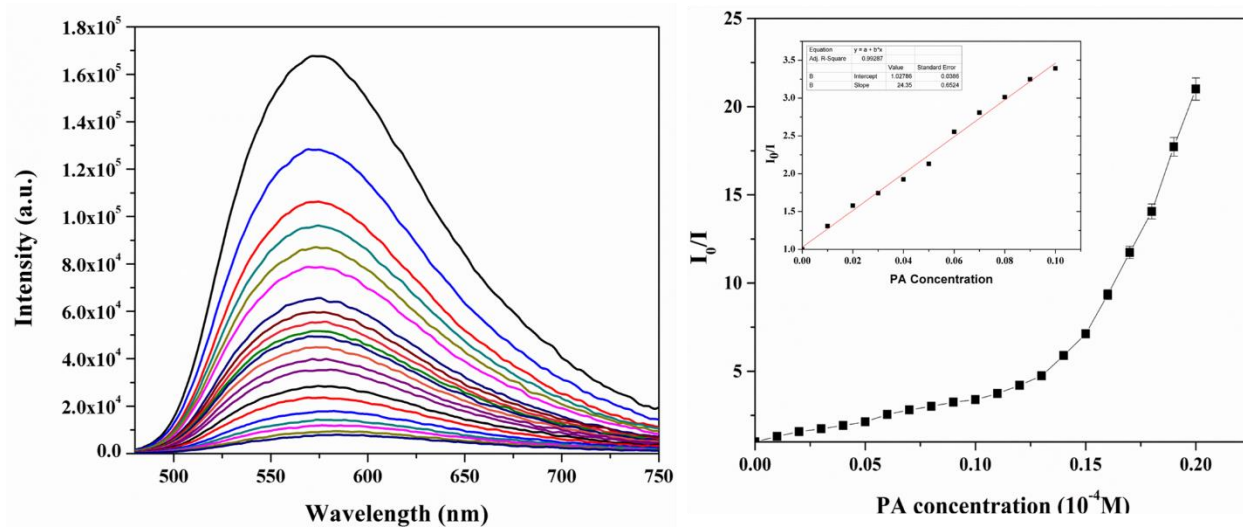

**Fig. S39.** Change in the fluorescence of AC-6 upon the addition of PA. b) Stern–Volmer plots of AC-6 using PA as a quencher. Inset: Stern–Volmer plots at lower concentration region of PA.

**Table ST6** The Stern – Volmer quenching constants and detection limits data of luminophores in THF at 298 K.

| Luminophore | Stern – Volmer constant ( $k_{SV}$ )<br>( $10^4 \times M^{-1}$ ) | Detection limit (ppb) |
|-------------|------------------------------------------------------------------|-----------------------|
| AC-1        | 12.66                                                            | 100                   |
| AC-2        | 25.31                                                            | 450                   |
| AC-3        | 12.09                                                            | 150                   |
| AC-4        | 9.16                                                             | 200                   |
| AC-5        | 11.45                                                            | 200                   |
| AC-6        | 24.35                                                            | 50                    |

**Lifetime measurements:**

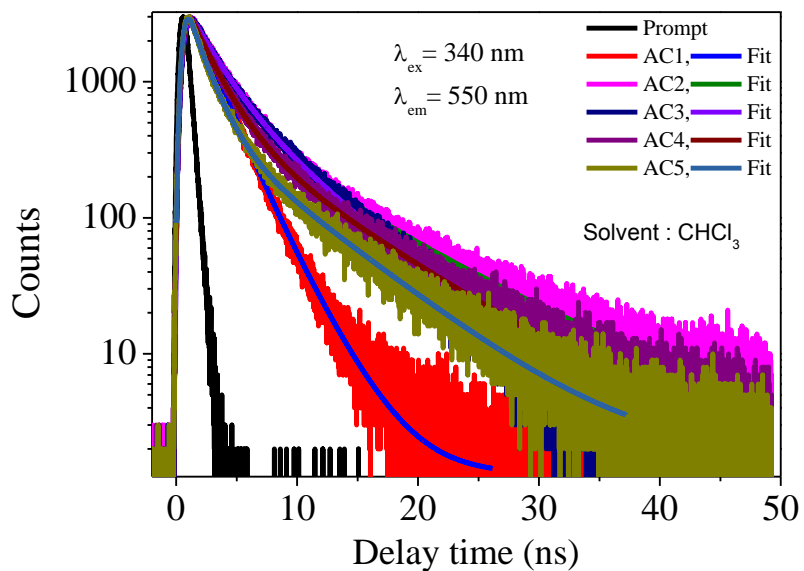

**Fig. S40.** Lifetime spectra of the AC compounds.

### Lifetime measurements of luminophores with PA:

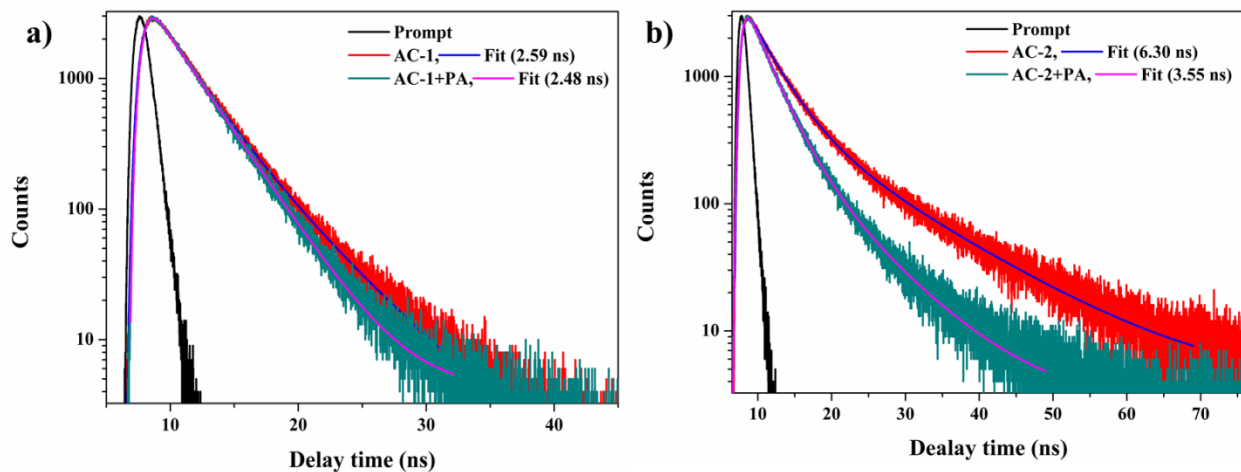

**Fig. S41.** Lifetime spectra of AC-1 (a) and AC-2 (b) luminophores with and without PA.

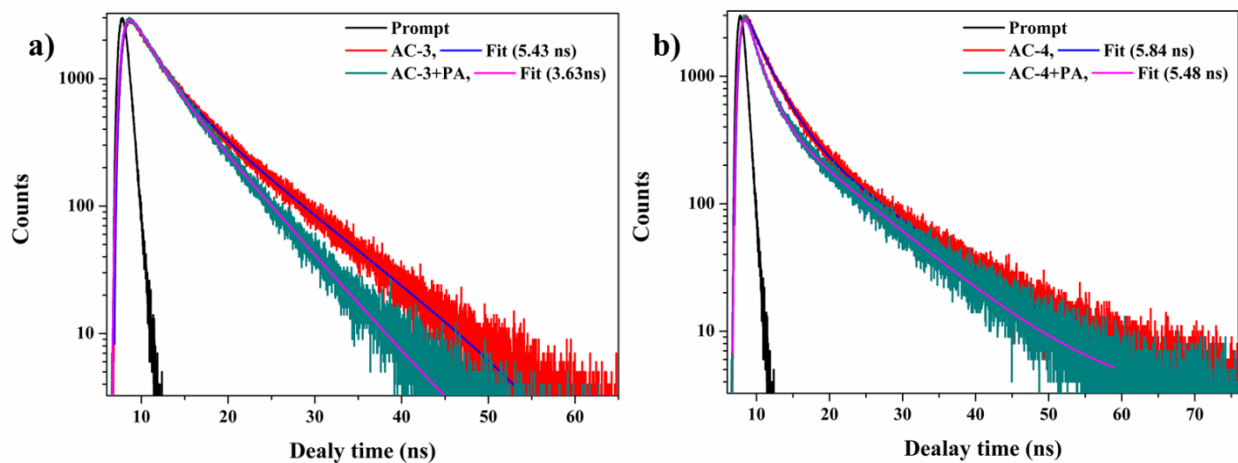

**Fig. S42.** Lifetime spectra of AC-3 (a) and AC-4 (b) luminophores with and without PA.

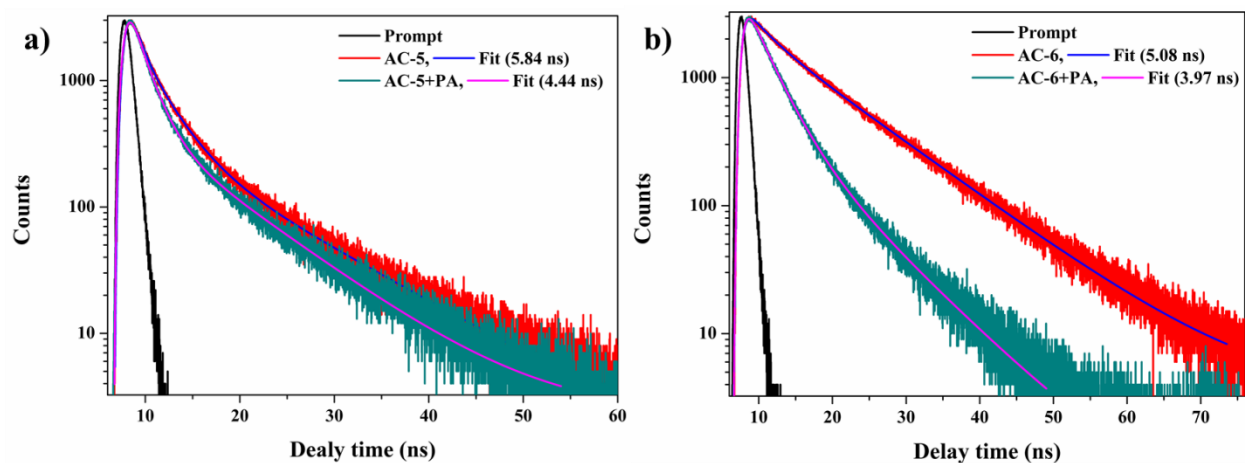

**Fig. S43.** Lifetime spectra of AC-5 (a) and AC-6 (b) luminophores with and without PA.

**Table ST7: Excited state time constants of AC compounds**

| Compounds | $\lambda_{\text{ex}}(\text{nm})$ | $\lambda_{\text{em}}(\text{nm})$ | $\tau_1$ (ns) | $B_1$ | $\tau_2$ (ns) | $B_2$ | $\langle\tau\rangle(\text{ns})$ | $\chi^2$ |
|-----------|----------------------------------|----------------------------------|---------------|-------|---------------|-------|---------------------------------|----------|
| AC-1      | 340                              | 550                              | 1.79          | 68.52 | 3.48          | 31.48 | 2.59                            | 1.09     |
| AC-1+PA   |                                  |                                  | 1.72          | 62.92 | 3.18          | 37.08 | 2.48                            | 1.05     |
| AC-2      |                                  |                                  | 2.45          | 61.67 | 8.56          | 38.33 | 6.30                            | 1.07     |
| AC-2+PA   |                                  |                                  | 1.93          | 75.98 | 5.39          | 24.02 | 3.55                            | 1.04     |
| AC-3      |                                  |                                  | 2.32          | 52.63 | 6.64          | 47.37 | 5.43                            | 1.18     |
| AC-3+PA   |                                  |                                  | 1.71          | 32.61 | 4.02          | 67.39 | 3.63                            | 1.08     |
| AC-4      |                                  |                                  | 2.04          | 60.65 | 7.44          | 39.35 | 5.84                            | 1.11     |
| AC-4+PA   |                                  |                                  | 1.30          | 52.87 | 6.43          | 47.13 | 5.48                            | 1.15     |
| AC-5      |                                  |                                  | 2.04          | 60.65 | 7.44          | 39.35 | 5.84                            | 1.11     |
| AC-5+PA   |                                  |                                  | 1.14          | 63.92 | 5.62          | 36.08 | 4.44                            | 1.16     |
| AC-6      |                                  |                                  | 1.49          | 61.03 | 6.39          | 38.97 | 5.08                            | 1.18     |
| AC-6+PA   |                                  |                                  | 2.05          | 68.13 | 5.50          | 31.87 | 3.97                            | 1.08     |

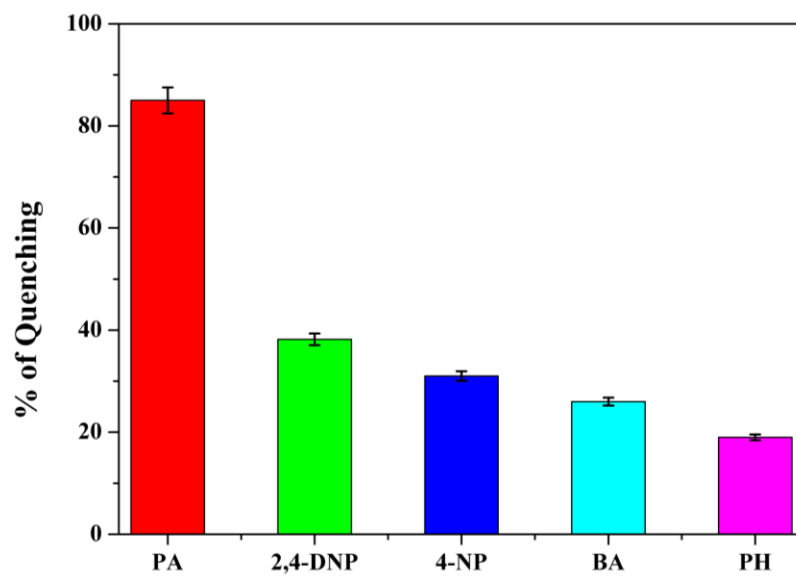

**Fig. S44.** Fluorescence quenching efficiencies of AC-1 towards different analytes.

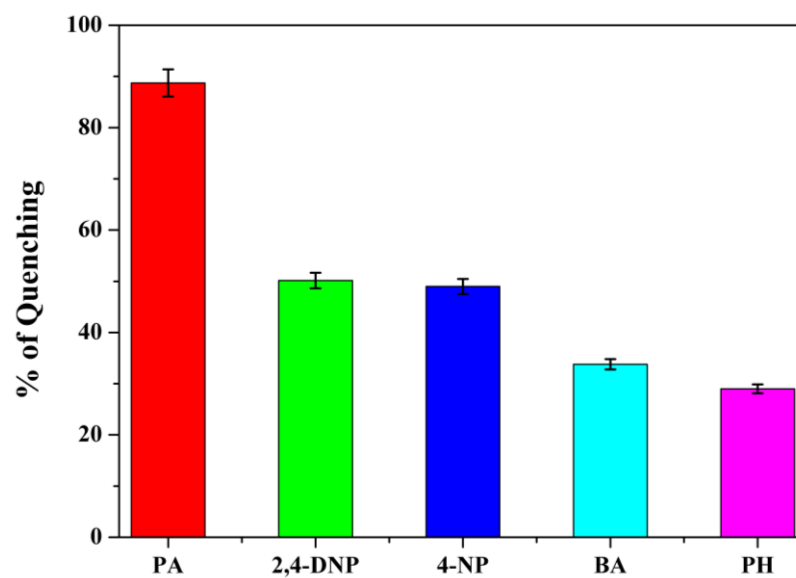

**Fig. S45.** Fluorescence quenching efficiencies of AC-2 towards different analytes.



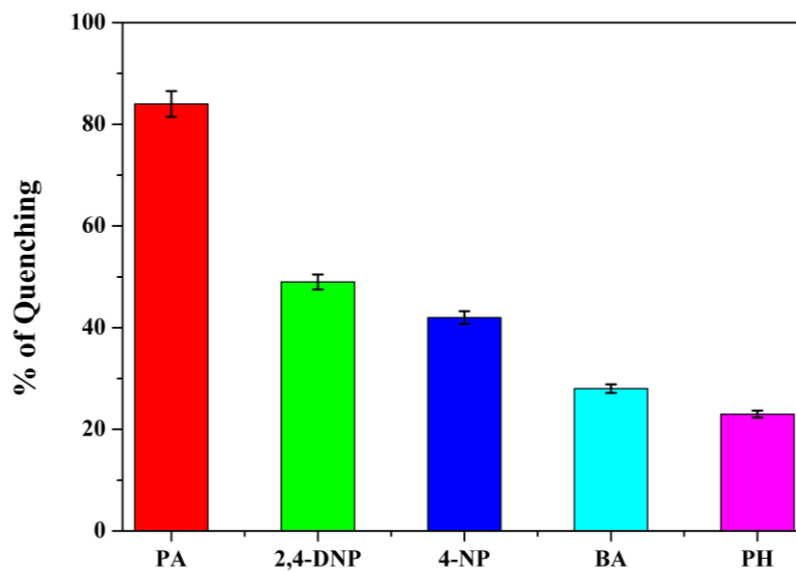

**Fig. S46.** Fluorescence quenching efficiencies of AC-3 towards different analytes.

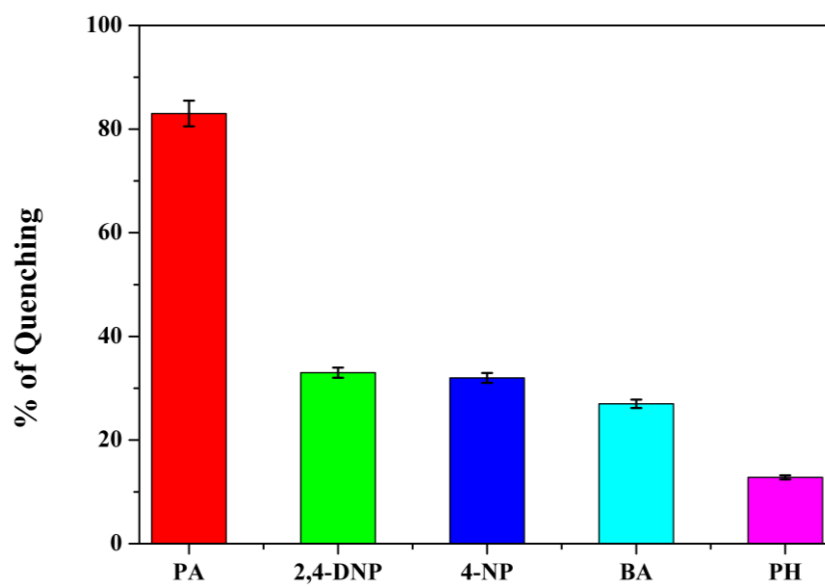

**Fig. S47.** Fluorescence quenching efficiencies of AC-5 towards different analytes.

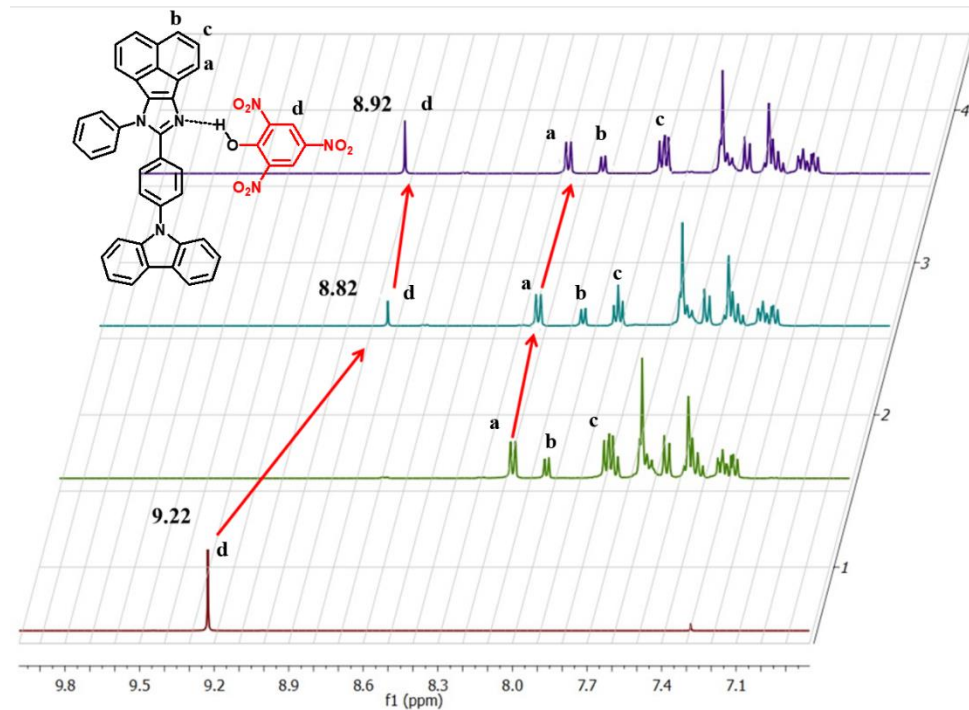

**Fig. S48.**  $^1\text{H-NMR}$  spectra of AC-1, with PA (0, 0.5, 1.0 equiv) in  $\text{CDCl}_3$ .

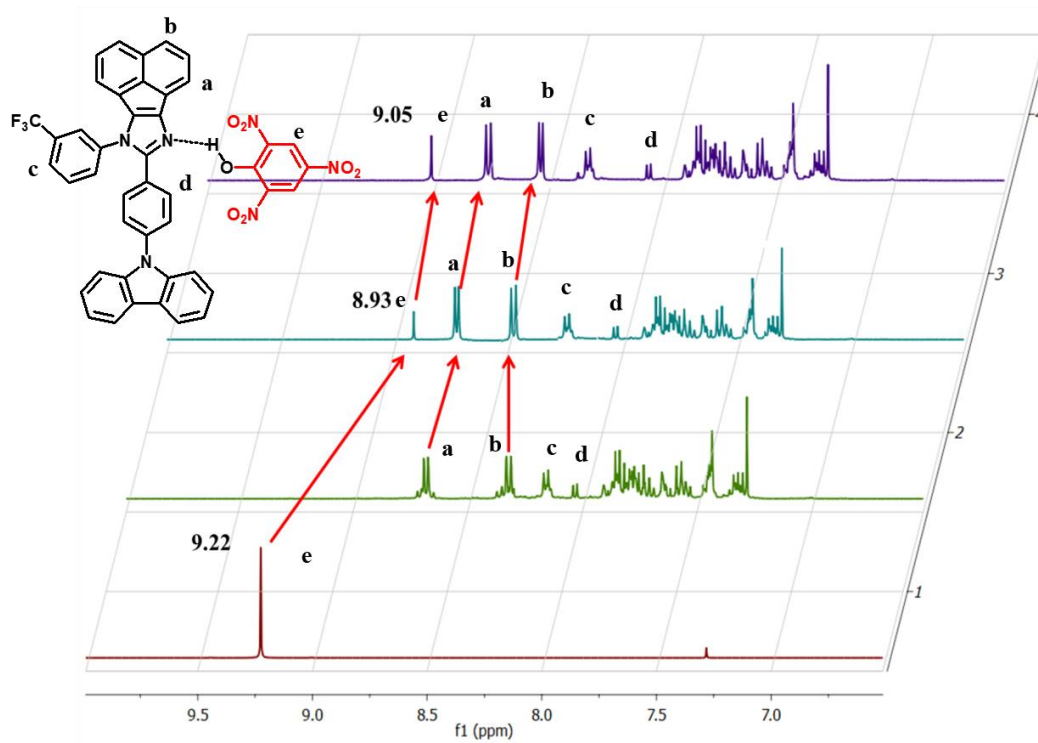

**Fig. S49.**  $^1\text{H-NMR}$  spectra of AC-4, with PA (0, 0.5, 1.0 equiv) in  $\text{CDCl}_3$ .

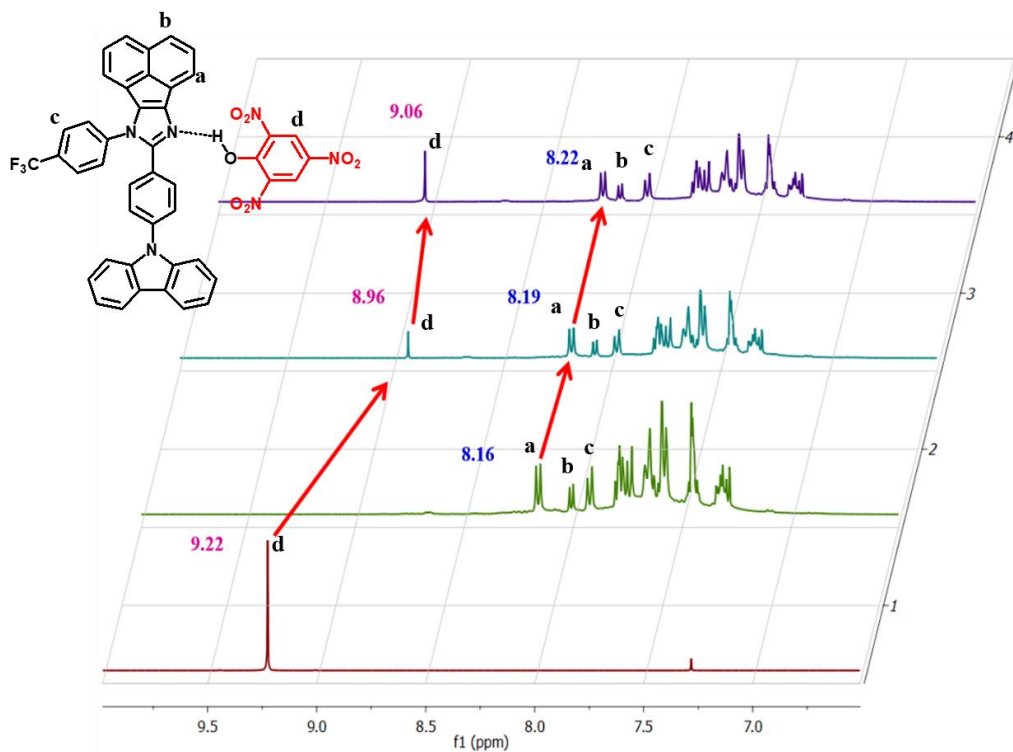

**Fig. S50.**  $^1\text{H-NMR}$  spectra of AC-5, with PA (0, 0.5, 1.0 equiv) in  $\text{CDCl}_3$ .

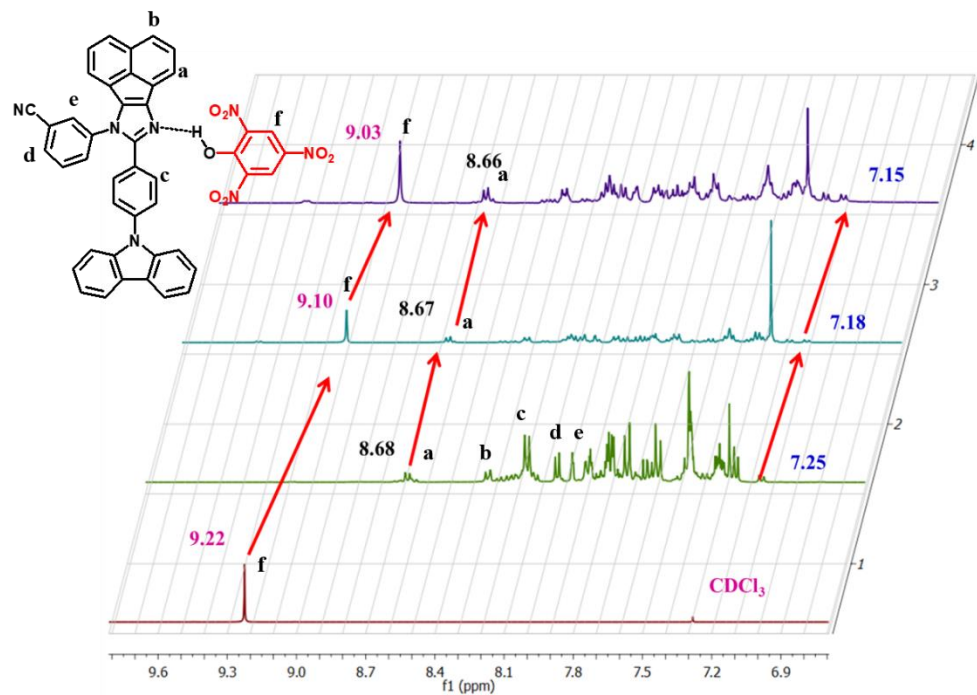

**Fig. S51.**  $^1\text{H-NMR}$  spectra of AC-6, with PA (0, 0.5, 1.0 equiv) in  $\text{CDCl}_3$ .

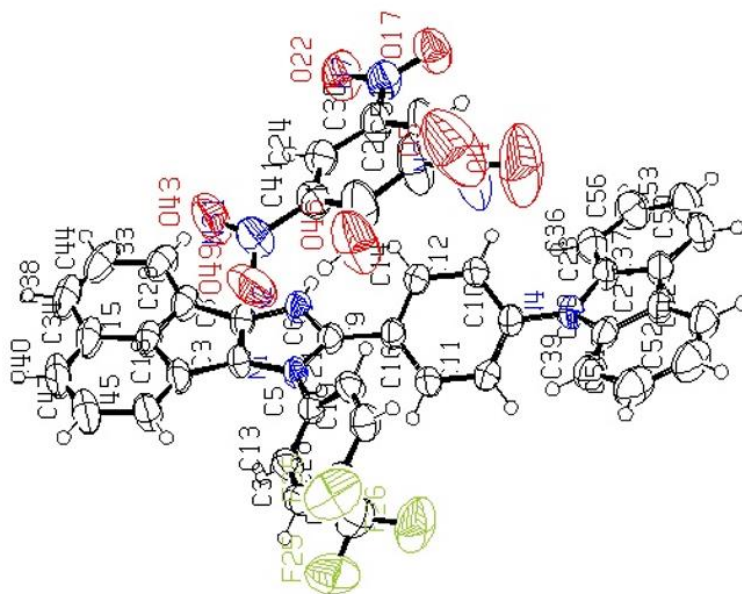

**Fig. S52.** ORTEP Diagram of AC-5 with Picric acid (eclipsed form 50% f probability). N atoms blue, F atoms in green and O atoms in red in color.

**Table ST8:** Crystal data and structure refinement for AC-5 with PA.

|                                    | AC-5 with PA                                                                           | AC-6 with PA                                                    |
|------------------------------------|----------------------------------------------------------------------------------------|-----------------------------------------------------------------|
| Identification code                | AC-5 with PA                                                                           | AC-6 with PA                                                    |
| Empirical formula                  | C <sub>3.38</sub> H <sub>2</sub> F <sub>0.23</sub> N <sub>0.46</sub> O <sub>0.54</sub> | C <sub>54</sub> H <sub>45</sub> N <sub>12</sub> O <sub>16</sub> |
| Formula weight                     | 62.13                                                                                  | 1118.02                                                         |
| Temperature/K                      | 293(2)                                                                                 | 293(2)                                                          |
| Crystal system                     | triclinic                                                                              | triclinic                                                       |
| Space group                        | P-1                                                                                    | P-1                                                             |
| a/Å                                | 11.4803(6)                                                                             | 10.8260(6)                                                      |
| b/Å                                | 13.3395(9)                                                                             | 15.7882(8)                                                      |
| c/Å                                | 14.9477(8)                                                                             | 17.3646(9)                                                      |
| α/°                                | 96.499(5)                                                                              | 65.809(5)                                                       |
| β/°                                | 111.425(5)                                                                             | 79.459(4)                                                       |
| γ/°                                | 114.287(6)                                                                             | 80.439(4)                                                       |
| Volume/Å <sup>3</sup>              | 1846.35(19)                                                                            | 2647.9(2)                                                       |
| Z                                  | 26                                                                                     | 2                                                               |
| ρ <sub>calc</sub> /cm <sup>3</sup> | 1.453                                                                                  | 1.402                                                           |
| μ/mm <sup>-1</sup>                 | 0.935                                                                                  | 0.893                                                           |
| F(000)                             | 830.0                                                                                  | 1162.0                                                          |

|                                                  |                                                                        |                                                                       |
|--------------------------------------------------|------------------------------------------------------------------------|-----------------------------------------------------------------------|
| Crystal size/mm <sup>3</sup>                     | 0.217 × 0.103 × 0.074                                                  | 0.149 × 0.085 × 0.064                                                 |
| Radiation                                        | CuK $\alpha$ ( $\lambda$ = 1.54184)                                    | CuK $\alpha$ ( $\lambda$ = 1.54184)                                   |
| 2 $\Theta$ range for data collection/ $^{\circ}$ | 7.64 to 133.84                                                         | 6.52 to 137.16                                                        |
| Index ranges                                     | -13 $\leq$ h $\leq$ 13, -12 $\leq$ k $\leq$ 15, -17 $\leq$ l $\leq$ 17 | -9 $\leq$ h $\leq$ 12, -18 $\leq$ k $\leq$ 18, -19 $\leq$ l $\leq$ 20 |
| Reflections collected                            | 11187                                                                  | 15913                                                                 |
| Independent reflections                          | 6475 [R <sub>int</sub> = 0.0218, R <sub>sigma</sub> = 0.0302]          | 9192 [R <sub>int</sub> = 0.0784, R <sub>sigma</sub> = 0.0993]         |
| Data/restraints/parameters                       | 6475/0/542                                                             | 9192/0/746                                                            |
| Goodness-of-fit on F <sup>2</sup>                | 1.037                                                                  | 1.752                                                                 |
| Final R indexes [I $\geq$ 2 $\sigma$ (I)]        | R <sub>1</sub> = 0.0710, wR <sub>2</sub> = 0.2075                      | R <sub>1</sub> = 0.1765, wR <sub>2</sub> = 0.4621                     |
| Final R indexes [all data]                       | R <sub>1</sub> = 0.0844, wR <sub>2</sub> = 0.2268                      | R <sub>1</sub> = 0.2214, wR <sub>2</sub> = 0.5056                     |
| Largest diff. peak/hole / e $\text{\AA}^{-3}$    | 1.00/-0.59                                                             | 2.43/-0.51                                                            |

**Table ST9:** Bond Lengths for AC-5 with PA.

| Atom | Atom | Length/ $\text{\AA}$ | Atom | Atom | Length/ $\text{\AA}$ |
|------|------|----------------------|------|------|----------------------|
| N1   | C3   | 1.383(3)             | C27  | C42  | 1.396(5)             |
| N1   | C5   | 1.439(3)             | C28  | C32  | 1.385(4)             |
| N1   | C6   | 1.366(3)             | C28  | C48  | 1.488(4)             |
| N2   | C6   | 1.334(3)             | C29  | C33  | 1.369(4)             |
| N2   | C8   | 1.369(3)             | C33  | C44  | 1.432(5)             |
| C3   | C8   | 1.361(4)             | C34  | C38  | 1.404(6)             |
| C3   | C18  | 1.468(3)             | C34  | C40  | 1.410(6)             |
| N4   | C10  | 1.421(3)             | F35  | C48  | 1.320(4)             |
| N4   | C20  | 1.401(4)             | C36  | C56  | 1.381(5)             |
| N4   | C23  | 1.404(4)             | C37  | C50  | 1.394(5)             |
| C5   | C13  | 1.374(4)             | C38  | C44  | 1.355(6)             |
| C5   | C21  | 1.386(4)             | C39  | C54  | 1.381(5)             |
| C6   | C9   | 1.465(3)             | C40  | C47  | 1.351(6)             |
| C8   | C29  | 1.466(4)             | C42  | C52  | 1.364(6)             |
| C9   | C14  | 1.389(4)             | C45  | C47  | 1.417(5)             |
| C9   | C16  | 1.392(4)             | C50  | C53  | 1.360(6)             |
| C10  | C11  | 1.393(4)             | C52  | C54  | 1.390(6)             |
| C10  | C12  | 1.383(4)             | C53  | C56  | 1.398(6)             |
| C11  | C16  | 1.381(4)             | N7   | O17  | 1.223(3)             |
| C12  | C14  | 1.380(4)             | N7   | O22  | 1.222(3)             |
| C13  | C32  | 1.378(4)             | N7   | C30  | 1.435(4)             |
| C15  | C18  | 1.421(4)             | C24  | C30  | 1.375(4)             |

|     |     |          |     |     |           |
|-----|-----|----------|-----|-----|-----------|
| C15 | C29 | 1.412(5) | C24 | C41 | 1.378(4)  |
| C15 | C34 | 1.398(4) | C30 | C51 | 1.380(4)  |
| C18 | C45 | 1.359(5) | N31 | C41 | 1.432(4)  |
| C19 | C21 | 1.379(4) | N31 | O43 | 1.213(4)  |
| C19 | C28 | 1.383(4) | N31 | O49 | 1.216(4)  |
| C20 | C27 | 1.413(4) | C41 | C1  | 1.440(5)  |
| C20 | C39 | 1.379(5) | O46 | C1  | 1.241(4)  |
| C23 | C36 | 1.381(5) | C51 | C2  | 1.340(5)  |
| C23 | C37 | 1.406(4) | C1  | C2  | 1.453(5)  |
| F25 | C48 | 1.332(5) | C2  | N3  | 1.457(6)  |
| F26 | C48 | 1.321(4) | N3  | O4  | 1.104(7)  |
| C27 | C37 | 1.432(5) | N3  | O5  | 1.279(10) |

**Table ST10:** Bond Angles for AC-5 with PA.

| Atom | Atom | Atom | Angle/°  | Atom | Atom | Atom | Angle/°  |
|------|------|------|----------|------|------|------|----------|
| C3   | N1   | C5   | 125.0(2) | C33  | C29  | C15  | 119.3(3) |
| C6   | N1   | C3   | 107.3(2) | C13  | C32  | C28  | 119.7(3) |
| C6   | N1   | C5   | 127.2(2) | C29  | C33  | C44  | 117.1(4) |
| C6   | N2   | C8   | 108.7(2) | C15  | C34  | C38  | 116.4(4) |
| N1   | C3   | C18  | 141.9(3) | C15  | C34  | C40  | 116.2(3) |
| C8   | C3   | N1   | 107.4(2) | C38  | C34  | C40  | 127.3(3) |
| C8   | C3   | C18  | 110.4(2) | C56  | C36  | C23  | 117.3(3) |
| C20  | N4   | C10  | 125.4(2) | C23  | C37  | C27  | 107.1(3) |
| C20  | N4   | C23  | 108.3(2) | C50  | C37  | C23  | 119.3(3) |
| C23  | N4   | C10  | 125.0(2) | C50  | C37  | C27  | 133.6(3) |
| C13  | C5   | N1   | 119.4(2) | C44  | C38  | C34  | 120.5(3) |
| C13  | C5   | C21  | 121.1(2) | C20  | C39  | C54  | 117.1(3) |
| C21  | C5   | N1   | 119.4(2) | C47  | C40  | C34  | 120.9(3) |
| N1   | C6   | C9   | 126.6(2) | C52  | C42  | C27  | 119.2(3) |
| N2   | C6   | N1   | 108.7(2) | C38  | C44  | C33  | 123.2(3) |
| N2   | C6   | C9   | 124.6(2) | C18  | C45  | C47  | 118.3(4) |
| N2   | C8   | C29  | 142.0(3) | C40  | C47  | C45  | 122.6(4) |
| C3   | C8   | N2   | 107.8(2) | F25  | C48  | C28  | 113.6(3) |
| C3   | C8   | C29  | 110.0(3) | F26  | C48  | F25  | 105.2(3) |
| C14  | C9   | C6   | 118.1(2) | F26  | C48  | C28  | 112.7(3) |
| C14  | C9   | C16  | 119.6(2) | F35  | C48  | F25  | 104.7(3) |
| C16  | C9   | C6   | 122.3(2) | F35  | C48  | F26  | 107.5(3) |
| C11  | C10  | N4   | 120.4(2) | F35  | C48  | C28  | 112.4(3) |

|     |     |     |          |     |     |     |          |
|-----|-----|-----|----------|-----|-----|-----|----------|
| C12 | C10 | N4  | 119.8(2) | C53 | C50 | C37 | 119.1(3) |
| C12 | C10 | C11 | 119.8(2) | C42 | C52 | C54 | 120.8(3) |
| C16 | C11 | C10 | 119.7(2) | C50 | C53 | C56 | 121.0(4) |
| C14 | C12 | C10 | 120.6(2) | C39 | C54 | C52 | 121.9(4) |
| C5  | C13 | C32 | 119.8(3) | C36 | C56 | C53 | 121.4(4) |
| C12 | C14 | C9  | 119.9(2) | O17 | N7  | O22 | 122.4(3) |
| C29 | C15 | C18 | 113.9(2) | O17 | N7  | C30 | 119.1(2) |
| C34 | C15 | C18 | 122.8(3) | O22 | N7  | C30 | 118.5(3) |
| C34 | C15 | C29 | 123.3(3) | C30 | C24 | C41 | 119.2(3) |
| C11 | C16 | C9  | 120.4(2) | C24 | C30 | N7  | 120.2(3) |
| C15 | C18 | C3  | 102.5(2) | C24 | C30 | C51 | 121.4(3) |
| C45 | C18 | C3  | 138.3(3) | C51 | C30 | N7  | 118.4(3) |
| C45 | C18 | C15 | 119.1(3) | O43 | N31 | C41 | 118.1(3) |
| C21 | C19 | C28 | 120.0(3) | O43 | N31 | O49 | 122.6(3) |
| N4  | C20 | C27 | 108.2(3) | O49 | N31 | C41 | 119.3(3) |
| C39 | C20 | N4  | 129.8(3) | C24 | C41 | N31 | 117.1(3) |
| C39 | C20 | C27 | 122.0(3) | C24 | C41 | C1  | 123.5(3) |
| C19 | C21 | C5  | 119.2(3) | N31 | C41 | C1  | 119.4(3) |
| N4  | C23 | C37 | 108.8(3) | C2  | C51 | C30 | 119.1(3) |
| C36 | C23 | N4  | 129.3(3) | C41 | C1  | C2  | 111.8(3) |
| C36 | C23 | C37 | 121.9(3) | O46 | C1  | C41 | 127.7(4) |
| C20 | C27 | C37 | 107.7(3) | O46 | C1  | C2  | 120.5(4) |
| C42 | C27 | C20 | 118.9(3) | C51 | C2  | C1  | 124.9(4) |
| C42 | C27 | C37 | 133.4(3) | C51 | C2  | N3  | 117.0(4) |
| C19 | C28 | C32 | 120.4(3) | C1  | C2  | N3  | 118.0(3) |
| C19 | C28 | C48 | 118.5(3) | O4  | N3  | C2  | 124.1(7) |
| C32 | C28 | C48 | 121.1(3) | O4  | N3  | O5  | 116.6(6) |
| C15 | C29 | C8  | 103.1(2) | O5  | N3  | C2  | 117.7(6) |
| C33 | C29 | C8  | 137.4(3) |     |     |     |          |

**Table ST11:** Hydrogen Bonds for AC-5 with PA.

| D  | H  | A                | d(D-H)/Å | d(H-A)/Å | d(D-A)/Å | D-H-A/° |
|----|----|------------------|----------|----------|----------|---------|
| N2 | H2 | O46 <sup>1</sup> | 0.86     | 1.81     | 2.657(3) | 167.2   |

<sup>1</sup>+X,-1+Y,+Z

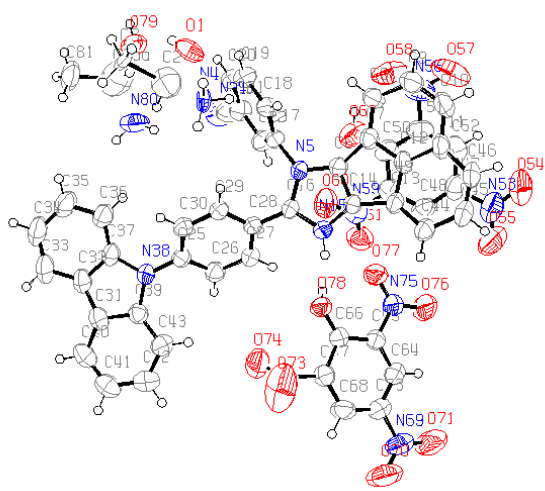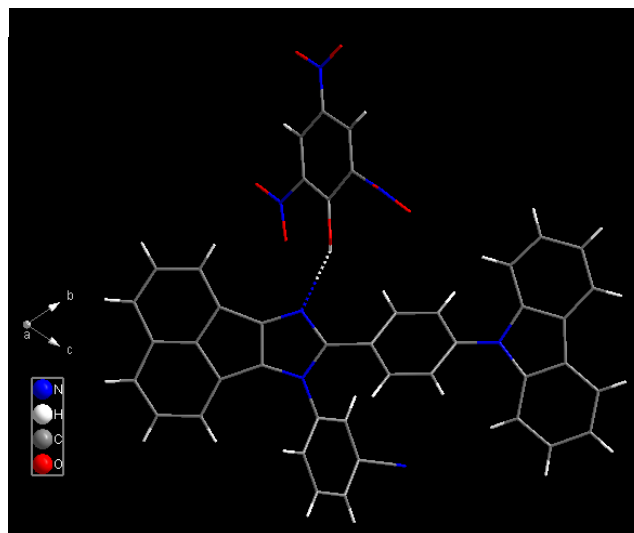

**Fig. S53.** (left) ORTEP Diagram of AC-6 with Picric acid. (Right) wire and stick structures of AC-6 with Picric acid by using Diamond software (solvent molecules is vomited). N atoms blue, F atoms in green and O atoms in red in color.

**Table ST12:** Crystal data and structure refinement for AC-6 with PA.

| <b>Table 1 Crystal data and structure refinement for AC_6_PA_RT_CU.</b> |                                                                 |
|-------------------------------------------------------------------------|-----------------------------------------------------------------|
| Identification code                                                     | AC_6_PA_RT_CU                                                   |
| Empirical formula                                                       | C <sub>54</sub> H <sub>45</sub> N <sub>12</sub> O <sub>16</sub> |
| Formula weight                                                          | 1118.02                                                         |
| Temperature/K                                                           | 293(2)                                                          |
| Crystal system                                                          | triclinic                                                       |
| Space group                                                             | P-1                                                             |
| a/Å                                                                     | 10.8260(6)                                                      |
| b/Å                                                                     | 15.7882(8)                                                      |
| c/Å                                                                     | 17.3646(9)                                                      |
| α/°                                                                     | 65.809(5)                                                       |
| β/°                                                                     | 79.459(4)                                                       |
| γ/°                                                                     | 80.439(4)                                                       |
| Volume/Å <sup>3</sup>                                                   | 2647.9(2)                                                       |
| Z                                                                       | 2                                                               |
| ρ <sub>calc</sub> /cm <sup>3</sup>                                      | 1.402                                                           |



|                                                |                                                               |
|------------------------------------------------|---------------------------------------------------------------|
| $\mu/\text{mm}^{-1}$                           | 0.893                                                         |
| F(000)                                         | 1162.0                                                        |
| Crystal size/ $\text{mm}^3$                    | $0.149 \times 0.085 \times 0.064$                             |
| Radiation                                      | $\text{CuK}\alpha$ ( $\lambda = 1.54184$ )                    |
| $2\theta$ range for data collection/ $^\circ$  | 6.52 to 137.16                                                |
| Index ranges                                   | $-9 \leq h \leq 12, -18 \leq k \leq 18, -19 \leq l \leq 20$   |
| Reflections collected                          | 15913                                                         |
| Independent reflections                        | 9192 [ $R_{\text{int}} = 0.0784, R_{\text{sigma}} = 0.0993$ ] |
| Data/restraints/parameters                     | 9192/0/746                                                    |
| Goodness-of-fit on $F^2$                       | 1.752                                                         |
| Final R indexes [ $I \geq 2\sigma(I)$ ]        | $R_1 = 0.1765, wR_2 = 0.4621$                                 |
| Final R indexes [all data]                     | $R_1 = 0.2214, wR_2 = 0.5056$                                 |
| Largest diff. peak/hole / $e \text{ \AA}^{-3}$ | 2.43/-0.51                                                    |

**Table ST13: Bond Lengths for AC-6 with PA**

| Atom | Atom | Length/ $\text{\AA}$ | Atom | Atom | Length/ $\text{\AA}$ |
|------|------|----------------------|------|------|----------------------|
| N4   | C2   | 1.776(15)            | N59  | O60  | 1.221(10)            |
| C3   | C2   | 1.718(14)            | C49  | C50  | 1.401(12)            |
| N15  | C16  | 1.351(8)             | C49  | C48  | 1.382(12)            |
| N15  | C14  | 1.365(9)             | C50  | O62  | 1.343(11)            |
| O1   | C2   | 1.714(15)            | C50  | C51  | 1.393(14)            |
| N38  | C39  | 1.406(9)             | C20  | C19  | 1.366(13)            |
| N38  | C37  | 1.409(8)             | C32  | C33  | 1.395(11)            |
| N38  | C25  | 1.416(9)             | C36  | C35  | 1.403(12)            |
| N5   | C6   | 1.376(8)             | C46  | C45  | 1.325(13)            |
| N5   | C16  | 1.360(8)             | C40  | C41  | 1.336(15)            |
| N5   | C17  | 1.440(8)             | C51  | N56  | 1.454(13)            |
| C6   | C14  | 1.360(9)             | C51  | C52  | 1.409(14)            |
| C6   | C7   | 1.451(9)             | C8   | C9   | 1.416(12)            |
| C39  | C31  | 1.418(10)            | C42  | C41  | 1.393(14)            |
| C39  | C43  | 1.389(11)            | C10  | C9   | 1.349(13)            |
| C16  | C28  | 1.455(9)             | C47  | C48  | 1.371(14)            |
| C37  | C32  | 1.396(11)            | C47  | N53  | 1.475(12)            |
| C37  | C36  | 1.379(11)            | C47  | C52  | 1.351(14)            |
| C13  | C12  | 1.407(10)            | C33  | C34  | 1.357(15)            |
| C13  | C14  | 1.467(9)             | N53  | O55  | 1.180(14)            |
| C13  | C44  | 1.382(9)             | N53  | O54  | 1.224(14)            |
| C30  | C25  | 1.394(10)            | C23  | N24  | 1.130(15)            |
| C30  | C29  | 1.377(10)            | O58  | N56  | 1.202(15)            |

|     |     |           |     |      |           |
|-----|-----|-----------|-----|------|-----------|
| C25 | C26 | 1.379(10) | N56 | O57  | 1.264(16) |
| C26 | C27 | 1.378(10) | C35 | C34  | 1.389(16) |
| C12 | C11 | 1.400(10) | O78 | C66  | 1.255(8)  |
| C12 | C7  | 1.430(9)  | O77 | N75  | 1.223(9)  |
| C28 | C29 | 1.385(10) | C66 | C67  | 1.439(10) |
| C28 | C27 | 1.378(10) | C66 | C65  | 1.441(10) |
| C17 | C18 | 1.377(10) | N75 | C65  | 1.452(9)  |
| C17 | C22 | 1.379(11) | N75 | O76  | 1.199(10) |
| C31 | C32 | 1.442(12) | C67 | N72  | 1.442(10) |
| C31 | C40 | 1.391(12) | C67 | C68  | 1.355(11) |
| O61 | N59 | 1.215(10) | C65 | C64  | 1.366(10) |
| C43 | C42 | 1.380(12) | O74 | N72  | 1.229(11) |
| C18 | C19 | 1.380(10) | N72 | O73  | 1.224(13) |
| C21 | C22 | 1.391(10) | C68 | C63  | 1.388(13) |
| C21 | C20 | 1.382(12) | C63 | C64  | 1.385(13) |
| C21 | C23 | 1.458(14) | C63 | N69  | 1.421(11) |
| C11 | C46 | 1.435(11) | O71 | N69  | 1.230(14) |
| C11 | C10 | 1.412(12) | O70 | N69  | 1.235(14) |
| C7  | C8  | 1.370(10) | O79 | C0AA | 1.73(2)   |
| C44 | C45 | 1.426(12) | N80 | C0AA | 1.77(2)   |
| N59 | C49 | 1.461(12) | C81 | C0AA | 1.65(2)   |

**Table ST14: Bond Angles for AC-6 with PA.**

| Atom Atom Atom | Angle/° | Atom Atom Atom | Angle/°  |     |     |     |           |
|----------------|---------|----------------|----------|-----|-----|-----|-----------|
| C16            | N15     | C14            | 108.1(5) | O62 | C50 | C51 | 123.6(8)  |
| C39            | N38     | C37            | 108.0(6) | C51 | C50 | C49 | 117.3(8)  |
| C39            | N38     | C25            | 125.4(5) | C19 | C20 | C21 | 119.6(7)  |
| C37            | N38     | C25            | 126.4(6) | C20 | C19 | C18 | 120.0(7)  |
| C6             | N5      | C17            | 125.6(5) | C37 | C32 | C31 | 107.9(6)  |
| C16            | N5      | C6             | 108.2(5) | C37 | C32 | C33 | 120.8(8)  |
| C16            | N5      | C17            | 125.4(5) | C33 | C32 | C31 | 131.3(8)  |
| N5             | C6      | C7             | 142.4(6) | C37 | C36 | C35 | 117.4(8)  |
| C14            | C6      | N5             | 107.0(6) | C45 | C46 | C11 | 121.5(7)  |
| C14            | C6      | C7             | 110.4(6) | C41 | C40 | C31 | 121.0(9)  |
| N38            | C39     | C31            | 108.6(6) | C50 | C51 | N56 | 119.0(9)  |
| C43            | C39     | N38            | 130.5(7) | C50 | C51 | C52 | 121.3(8)  |
| C43            | C39     | C31            | 120.9(7) | C52 | C51 | N56 | 119.7(10) |
| N15            | C16     | N5             | 108.2(5) | C7  | C8  | C9  | 118.6(7)  |
| N15            | C16     | C28            | 124.9(5) | C43 | C42 | C41 | 122.2(8)  |
| N5             | C16     | C28            | 126.9(5) | C9  | C10 | C11 | 120.7(7)  |

|     |     |     |          |     |     |     |           |
|-----|-----|-----|----------|-----|-----|-----|-----------|
| C32 | C37 | N38 | 108.8(6) | C48 | C47 | N53 | 117.7(9)  |
| C36 | C37 | N38 | 130.1(7) | C52 | C47 | C48 | 124.1(8)  |
| C36 | C37 | C32 | 121.0(7) | C52 | C47 | N53 | 118.1(9)  |
| C12 | C13 | C14 | 103.1(5) | C47 | C48 | C49 | 117.4(8)  |
| C44 | C13 | C12 | 119.6(6) | C34 | C33 | C32 | 118.2(9)  |
| C44 | C13 | C14 | 137.3(7) | C46 | C45 | C44 | 124.1(7)  |
| C29 | C30 | C25 | 119.6(6) | C10 | C9  | C8  | 122.9(8)  |
| C30 | C25 | N38 | 120.2(6) | O55 | N53 | C47 | 118.9(10) |
| C26 | C25 | N38 | 120.5(6) | O55 | N53 | O54 | 124.4(11) |
| C26 | C25 | C30 | 119.3(6) | O54 | N53 | C47 | 116.7(11) |
| C27 | C26 | C25 | 120.6(7) | N24 | C23 | C21 | 176.7(14) |
| C13 | C12 | C7  | 113.3(6) | O58 | N56 | C51 | 120.8(11) |
| C11 | C12 | C13 | 124.0(6) | O58 | N56 | O57 | 123.3(11) |
| C11 | C12 | C7  | 122.6(7) | O57 | N56 | C51 | 115.9(12) |
| C29 | C28 | C16 | 119.6(6) | C40 | C41 | C42 | 120.0(8)  |
| C27 | C28 | C16 | 121.2(6) | C34 | C35 | C36 | 120.9(9)  |
| C27 | C28 | C29 | 119.1(6) | C33 | C34 | C35 | 121.6(8)  |
| C18 | C17 | N5  | 120.1(7) | C3  | C2  | N4  | 109.6(8)  |
| C22 | C17 | N5  | 119.0(6) | O1  | C2  | N4  | 109.2(8)  |
| C22 | C17 | C18 | 120.8(6) | O1  | C2  | C3  | 114.5(8)  |
| C39 | C31 | C32 | 106.7(6) | O78 | C66 | C67 | 120.7(6)  |
| C40 | C31 | C39 | 118.6(8) | O78 | C66 | C65 | 127.4(6)  |
| C40 | C31 | C32 | 134.7(8) | C65 | C66 | C67 | 111.9(6)  |
| N15 | C14 | C6  | 108.5(6) | O77 | N75 | C65 | 120.1(6)  |
| N15 | C14 | C13 | 141.4(6) | O76 | N75 | O77 | 121.7(7)  |
| C6  | C14 | C13 | 110.1(6) | O76 | N75 | C65 | 118.2(7)  |
| C42 | C43 | C39 | 117.3(8) | C66 | C67 | N72 | 115.4(6)  |
| C19 | C18 | C17 | 120.2(7) | C68 | C67 | C66 | 125.3(7)  |
| C22 | C21 | C23 | 118.4(7) | C68 | C67 | N72 | 119.3(7)  |
| C20 | C21 | C22 | 121.2(7) | C66 | C65 | N75 | 120.2(6)  |
| C20 | C21 | C23 | 120.3(7) | C64 | C65 | C66 | 123.4(7)  |
| C30 | C29 | C28 | 120.9(7) | C64 | C65 | N75 | 116.4(7)  |
| C12 | C11 | C46 | 114.5(7) | O74 | N72 | C67 | 119.7(9)  |
| C12 | C11 | C10 | 116.7(7) | O73 | N72 | C67 | 118.9(9)  |
| C10 | C11 | C46 | 128.8(7) | O73 | N72 | O74 | 121.2(10) |
| C12 | C7  | C6  | 103.0(6) | C67 | C68 | C63 | 118.9(7)  |
| C8  | C7  | C6  | 138.4(6) | C68 | C63 | C64 | 120.1(7)  |
| C8  | C7  | C12 | 118.5(6) | C68 | C63 | N69 | 119.9(9)  |
| C13 | C44 | C45 | 116.4(7) | C64 | C63 | N69 | 120.0(9)  |
| C26 | C27 | C28 | 120.4(6) | C65 | C64 | C63 | 120.3(8)  |
| O61 | N59 | C49 | 117.6(7) | C47 | C52 | C51 | 117.7(9)  |
| O61 | N59 | O60 | 123.9(8) | O71 | N69 | C63 | 119.1(10) |

|     |     |     |          |     |         |     |           |
|-----|-----|-----|----------|-----|---------|-----|-----------|
| O60 | N59 | C49 | 118.4(8) | O71 | N69     | O70 | 123.1(9)  |
| C17 | C22 | C21 | 118.1(7) | O70 | N69     | C63 | 117.8(10) |
| C50 | C49 | N59 | 119.9(7) | O79 | C0AAN80 |     | 107.6(13) |
| C48 | C49 | N59 | 117.8(8) | C81 | C0AAO79 |     | 116.1(12) |
| C48 | C49 | C50 | 122.2(8) | C81 | C0AAN80 |     | 116.4(15) |
| O62 | C50 | C49 | 119.1(8) |     |         |     |           |

## DFT Analysis:

**Table ST15.** FMO orbitals of the luminophores (AC-1 –AC-6).

| Compound | HOMO                                                                                | LUMO                                                                                | HOMO-1                                                                               | LUMO+1                                                                                |
|----------|-------------------------------------------------------------------------------------|-------------------------------------------------------------------------------------|--------------------------------------------------------------------------------------|---------------------------------------------------------------------------------------|
| AC-1     | 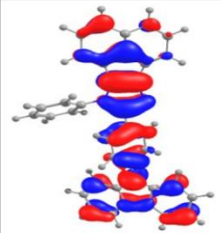   |    |    |    |
| AC-2     |    |    |    |    |
| AC-3     |   |   |   |   |
| AC-4     |  |  |  |  |
| AC-5     |  |  |  |  |
| AC-6     |  |  |  |  |

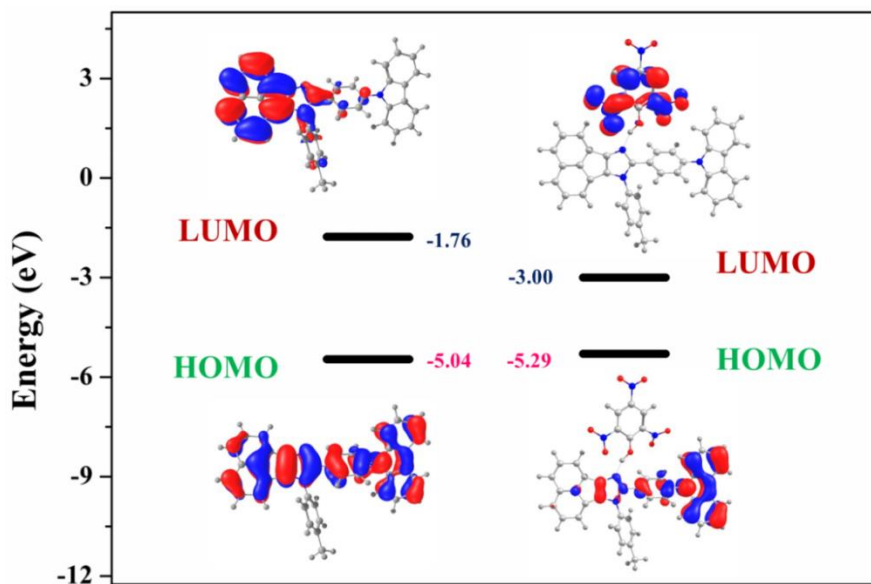

**Fig. S54.** Frontier molecular orbitals of AC-2 and AC-2 + PA obtained from the DFT calculations using Gaussian 09 program.

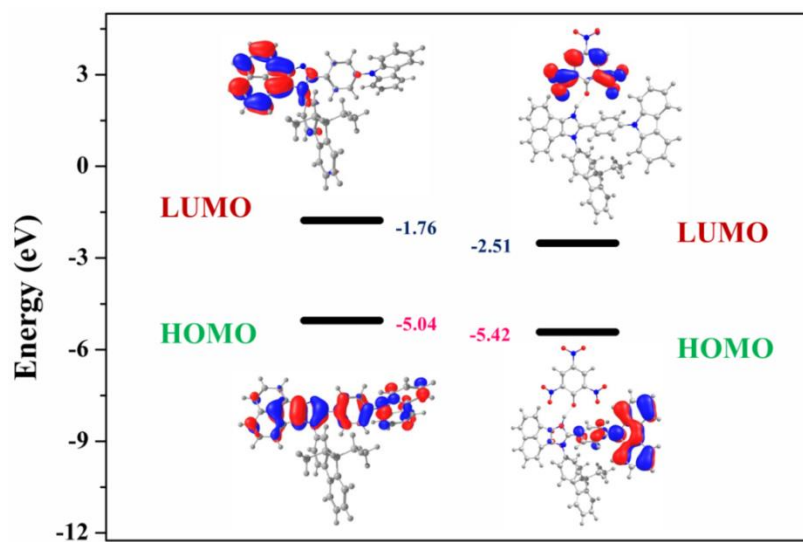

**Fig. S55.** Frontier molecular orbitals of AC-3 and AC-3 + PA obtained from the DFT calculations using Gaussian 09 program.

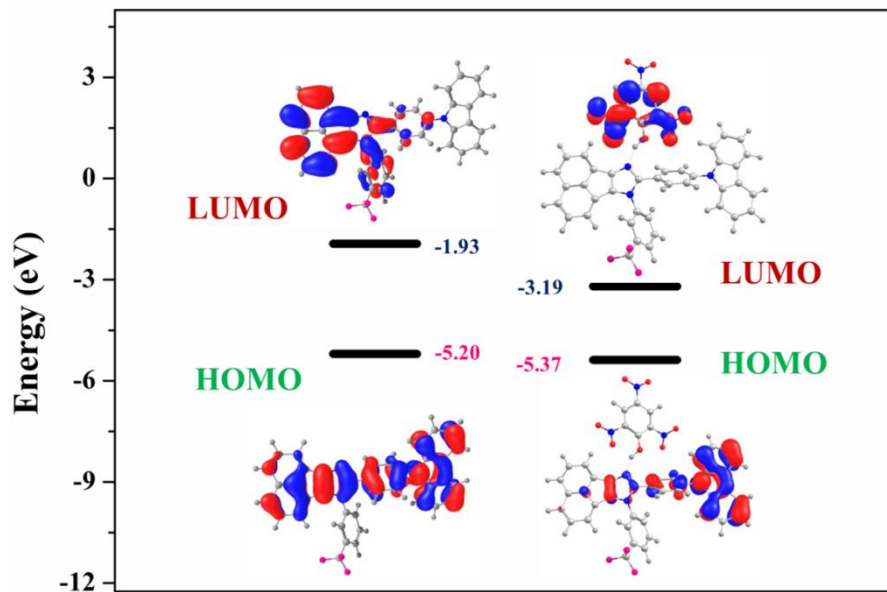

**Fig. S56.** Frontier molecular orbitals of AC-4 and AC-4 + PA obtained from the DFT calculations using Gaussian 09 program.

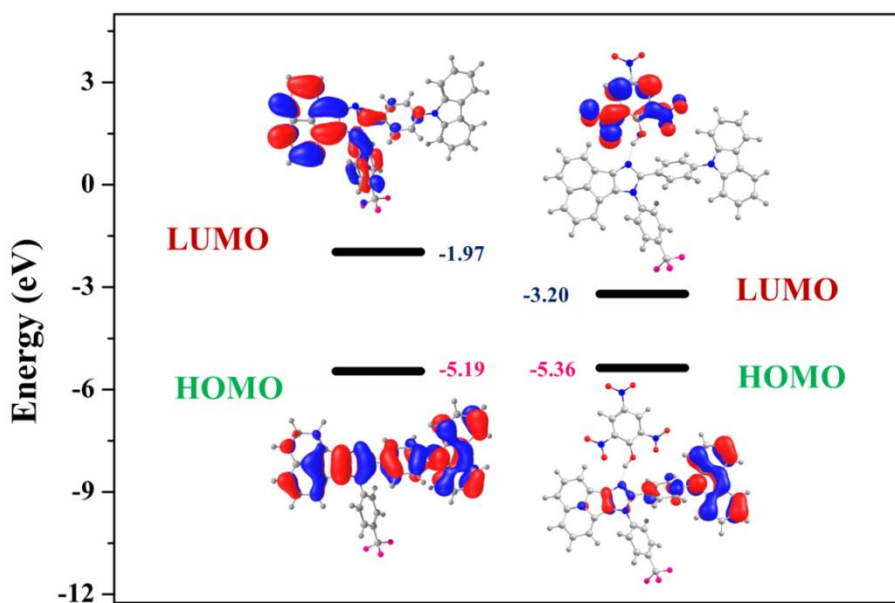

**Fig. S57.** Frontier molecular orbitals of AC-5 and AC-5 + PA obtained from the DFT calculations using Gaussian 09 program.

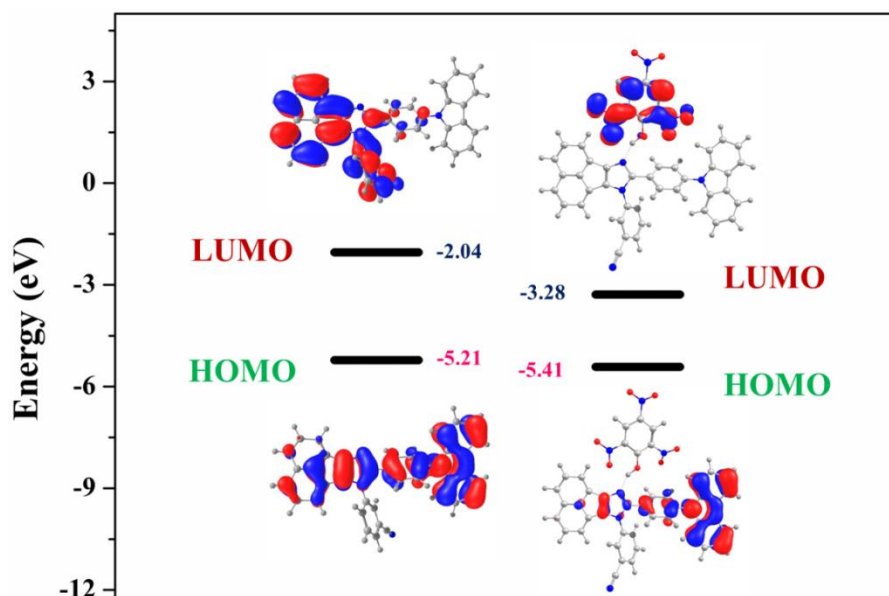

**Fig. S58.** Frontier molecular orbitals of AC-6 and AC-6 + PA obtained from the DFT calculations using Gaussian 09 program.

#### **Absorption and emission spectra:**

By using the optimized geometry of ground-state, the absorption spectra of the studied luminophores were calculated with the help of TDDFT/B3LYP method. The related absorption wavelength (nm), oscillator strength, major configuration, and their assignment are collected in Table ST17. Orbital composition of each excited state has also been calculated. These results give complete information about the absorption spectra. Simulated absorption spectra of these materials based on these calculated results are shown in Fig. S55. Table ST16 shows the calculated results of all materials are in good agreement with the experimental values. For example, the calculated absorption spectra at 320 nm and 425 nm are consistent with the experimental values of 327 nm and 420 nm, respectively. In addition, as reported by experimental data, the absorption spectra of all materials exhibit strong absorption bands in the 300–350 nm region and less intense absorption bands in the region of 400–450 nm. By using TD-DFT calculations we calculated singlet energy



levels of the synthesized luminophores. The detailed information of the corresponding transition and their oscillator strength were tabulated in Table ST16.

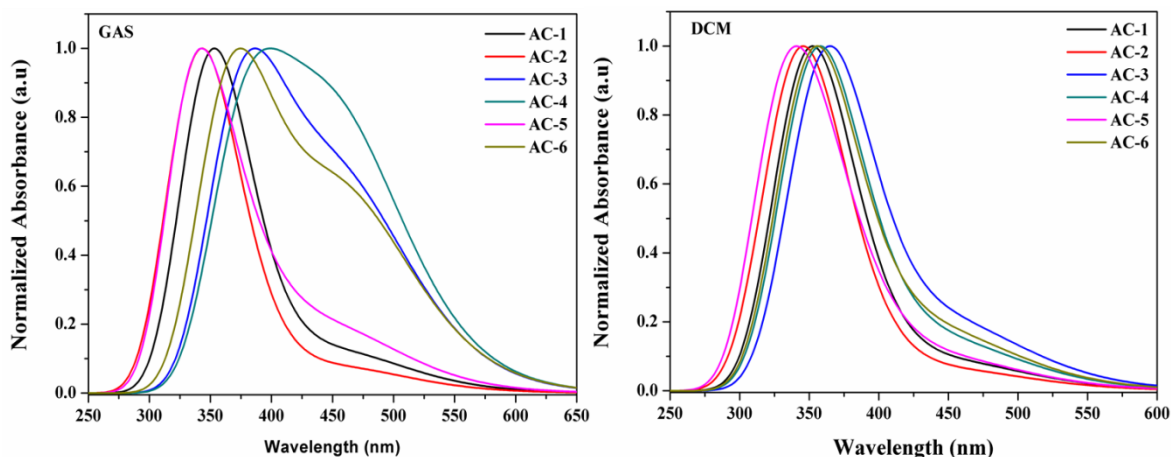

**Fig. S59.** UV-Visible spectra of luminophores (AC-1-AC-6) in gas and DCM phase.

**Table ST16: Singlet Energy Levels of the Compounds in Various Solvents:**

| Luminophore | State | $\lambda_{\max}$ nm | $f$    | Configuration                       |
|-------------|-------|---------------------|--------|-------------------------------------|
| AC-1        | Gas   | 464.59              | 0.0589 | HOMO $\rightarrow$ LUMO (24.32%)    |
|             |       | 371.21              | 0.1    | HOMO-1 $\rightarrow$ LUMO (64.05%)  |
|             |       |                     |        | HOMO $\rightarrow$ LUMO (24.32%)    |
|             | DCM   | 350.83              | 0.5179 | HOMO-1 $\rightarrow$ LUMO (15.92%)  |
|             |       |                     |        | HOMO $\rightarrow$ LUMO+1 (67.17%)  |
|             |       |                     |        |                                     |
| AC-2        | DCM   | 460.52              | 0.0679 | HOMO $\rightarrow$ LUMO (66.47%)    |
|             |       | 369.14              | 0.1525 | HOMO-1 $\rightarrow$ LUMO (63.12%)  |
|             |       |                     |        | HOMO $\rightarrow$ LUMO (22.14%)    |
|             | Gas   | 349.75              | 0.8006 | HOMO-1 $\rightarrow$ LUMO (21.42%)  |
|             |       |                     |        | HOMO $\rightarrow$ LUMO+1 (66.53%)  |
|             |       |                     |        |                                     |
| AC-3        | DCM   | 461.01              | 0.0656 | HOMO $\rightarrow$ LUMO (66.61%)    |
|             |       | 369.76              | 0.2083 | HOMO -1 $\rightarrow$ LUMO (57.48%) |
|             |       |                     |        | HOMO $\rightarrow$ LUMO (21.08%)    |
|             | Gas   | 358.58              | 0.1873 | HOMO -3 $\rightarrow$ LUMO (12.51%) |
|             |       |                     |        | HOMO-1 $\rightarrow$ LUMO (33.57%)  |
|             |       |                     |        | HOMO $\rightarrow$ LUMO+1 (59.64%)  |
| AC-4        | DCM   | 464.91              | 0.0557 | HOMO $\rightarrow$ LUMO (66.06%)    |
|             |       |                     |        |                                     |

|      |     |        |        |                          |
|------|-----|--------|--------|--------------------------|
|      |     | 381.61 | 0.0855 | HOMO → LUMO+1 (60.17%)   |
|      |     | 371.49 |        | HOMO-1 → LUMO (58.82%)   |
|      |     |        |        | HOMO → LUMO (15.64%)     |
|      |     |        |        | HOMO → LUMO+1 (33.54%)   |
|      |     |        |        |                          |
| AC-3 | DCM | 458.69 | 0.0813 | HOMO → LUMO (65.61%)     |
|      |     | 375.48 | 0.1426 | HOMO-1 → LUMO (61.85%)   |
|      |     |        |        | HOMO → LUMO (24.42%)     |
|      |     | 354.14 | 0.5625 | HOMO-1 → LUMO (22.66%)   |
|      |     |        |        | HOMO → LUMO+1 (65.79%)   |
|      |     |        |        |                          |
|      | Gas | 461.22 | 0.0725 | HOMO → LUMO (64.74%)     |
|      |     | 383.79 | 0.0838 | HOMO-1 → LUMO (60.97%)   |
|      |     |        |        | HOMO → LUMO (26.46%)     |
|      |     | 369.32 |        | HOMO-1 → LUMO (13.52%)   |
|      |     |        |        | HOMO → LUMO+1 (67.08%)   |
|      |     |        |        |                          |
| AC-4 | DCM | 458.92 | 0.0840 | HOMO → LUMO (65.04%)     |
|      |     | 409.79 |        | HOMO-1 → LUMO (62.82%)   |
|      |     |        |        | HOMO → LUMO (24.51%)     |
|      |     | 377.49 |        | HOMO-1 → LUMO (62.82%)   |
|      |     |        |        | HOMO → LUMO (24.51%)     |
|      |     |        |        |                          |
|      | Gas | 467.30 | 0.0801 | HOMO-1 → LUMO (27.51%)   |
|      |     |        |        | HOMO → LUMO (62.52%)     |
|      |     |        |        | HOMO → LUMO (11%)        |
|      |     | 441.23 |        | HOMO-1 → LUMO+1 (19.02%) |
|      |     |        |        | HOMO → LUMO+1 (66.06%)   |
|      |     | 397.78 |        | HOMO-1 → LUMO (62.57%)   |
|      |     |        |        | HOMO → LUMO+2 (12.88%)   |
|      |     |        |        |                          |
| AC-5 | DCM | 459.98 | 0.0821 | HOMO → LUMO (65.76%)     |
|      |     | 376.38 | 0.1706 | HOMO-1 → LUMO (59.09%)   |
|      |     |        |        | HOMO → LUMO (23.74%)     |
|      |     | 360.31 | 0.3006 | HOMO-1 → LUMO (29.20%)   |
|      |     |        |        | HOMO → LUMO+1 (62.56%)   |
|      |     |        |        |                          |
|      | Gas | 460.18 | 0.0820 | HOMO → LUMO (65.72%)     |
|      |     | 376.84 | 0.1669 | HOMO-1 → LUMO (59.02%)   |
|      |     |        |        | HOMO → LUMO (23.84%)     |
|      |     |        |        | HOMO → LUMO+1 (29.25%)   |
|      |     | 360.81 | 0.2839 | HOMO → LUMO+1 (62.46%)   |

|      |     |        |        |                                                                          |
|------|-----|--------|--------|--------------------------------------------------------------------------|
| AC-6 | DCM | 461.17 | 0.0656 | HOMO → LUMO (66.67%)                                                     |
|      |     | 367.94 | 0.1579 | HOMO-1 → LUMO (63.22%)<br>HOMO → LUMO (21.55%)<br>HOMO → LUMO+1 (21.15%) |
|      |     | 349.36 | 0.8075 | HOMO → LUMO+1 (66.35%)                                                   |
|      | Gas | 465.17 | 0.0566 | HOMO → LUMO (66%)                                                        |
|      |     | 375.07 |        | HOMO-1 → LUMO (64.47%)<br>HOMO → LUMO (23.36%)                           |
|      |     | 349.26 | 0.5583 | HOMO-1 → LUMO (15.56%)<br>HOMO → LUMO+1 (67.24%)                         |
|      |     |        |        |                                                                          |
|      |     | 349.31 | 0.8013 | HOMO → LUMO+1 (66.42%)                                                   |
|      |     |        |        |                                                                          |

**Optimized Cartesian coordinates and energies of luminophores:**

**AC-1**

Total Energy (a.u.): -1588.1204

**Table ST17: Optimized Cartesian coordinates:**

| Center Number | Atomic Number | Atomic Type | Coordinates (Angstroms) |           |           |
|---------------|---------------|-------------|-------------------------|-----------|-----------|
|               |               |             | X                       | Y         | Z         |
| 1             | 6             | 0           | 5.820606                | 1.411979  | 0.317374  |
| 2             | 6             | 0           | 5.024699                | 0.302325  | 0.118091  |
| 3             | 6             | 0           | 5.661340                | -0.962633 | -0.106966 |
| 4             | 6             | 0           | 7.048928                | -1.137058 | -0.133290 |
| 5             | 6             | 0           | 7.842569                | 0.029528  | 0.077740  |
| 6             | 6             | 0           | 7.235696                | 1.252884  | 0.292636  |
| 7             | 1             | 0           | 5.395354                | 2.395729  | 0.489311  |
| 8             | 6             | 0           | 4.723504                | -2.021066 | -0.307389 |
| 9             | 6             | 0           | 7.517699                | -2.463446 | -0.374114 |
| 10            | 1             | 0           | 8.926494                | -0.046274 | 0.067254  |
| 11            | 1             | 0           | 7.855049                | 2.131261  | 0.449349  |
| 12            | 6             | 0           | 6.616593                | -3.493217 | -0.568099 |
| 13            | 6             | 0           | 5.206127                | -3.290092 | -0.538989 |
| 14            | 1             | 0           | 8.585949                | -2.659890 | -0.405558 |
| 15            | 1             | 0           | 6.990511                | -4.496552 | -0.750573 |

|    |   |   |           |           |           |
|----|---|---|-----------|-----------|-----------|
| 16 | 1 | 0 | 4.536198  | -4.129516 | -0.697942 |
| 17 | 6 | 0 | 3.604061  | -0.021770 | 0.057688  |
| 18 | 6 | 0 | 3.411558  | -1.371668 | -0.200636 |
| 19 | 6 | 0 | 1.450400  | -0.525150 | -0.096832 |
| 20 | 7 | 0 | 2.345979  | 0.535803  | 0.121385  |
| 21 | 7 | 0 | 2.090241  | -1.676840 | -0.295897 |
| 22 | 6 | 0 | -0.013275 | -0.427268 | -0.068165 |
| 23 | 6 | 0 | -0.719233 | 0.526154  | 0.686145  |
| 24 | 6 | 0 | -0.751963 | -1.380949 | -0.793587 |
| 25 | 6 | 0 | -2.110927 | 0.532748  | 0.704891  |
| 26 | 1 | 0 | -0.185669 | 1.248589  | 1.291881  |
| 27 | 6 | 0 | -2.140729 | -1.367695 | -0.787269 |
| 28 | 1 | 0 | -0.212551 | -2.126542 | -1.366521 |
| 29 | 6 | 0 | -2.834841 | -0.407623 | -0.037511 |
| 30 | 1 | 0 | -2.643141 | 1.254313  | 1.315600  |
| 31 | 1 | 0 | -2.696691 | -2.090702 | -1.374747 |
| 32 | 6 | 0 | -5.082596 | -1.474496 | 0.297384  |
| 33 | 6 | 0 | -5.064468 | 0.705578  | -0.336820 |
| 34 | 6 | 0 | -4.737664 | -2.765542 | 0.707012  |
| 35 | 6 | 0 | -6.436478 | -1.065494 | 0.192533  |
| 36 | 6 | 0 | -4.699493 | 1.990151  | -0.749430 |
| 37 | 6 | 0 | -6.425119 | 0.324055  | -0.214384 |
| 38 | 6 | 0 | -5.773062 | -3.652597 | 0.992505  |
| 39 | 1 | 0 | -3.700843 | -3.066866 | 0.805760  |
| 40 | 6 | 0 | -7.457266 | -1.977545 | 0.484842  |
| 41 | 6 | 0 | -5.720243 | 2.898378  | -1.021197 |
| 42 | 1 | 0 | -3.657859 | 2.270349  | -0.859634 |
| 43 | 6 | 0 | -7.430741 | 1.256878  | -0.492838 |
| 44 | 6 | 0 | -7.120221 | -3.268430 | 0.880037  |
| 45 | 1 | 0 | -5.530205 | -4.661903 | 1.311557  |
| 46 | 1 | 0 | -8.498807 | -1.678480 | 0.408588  |
| 47 | 6 | 0 | -7.073182 | 2.541235  | -0.891794 |
| 48 | 1 | 0 | -5.461554 | 3.903163  | -1.342391 |
| 49 | 1 | 0 | -8.477014 | 0.978807  | -0.403148 |
| 50 | 1 | 0 | -7.902818 | -3.985368 | 1.108392  |
| 51 | 1 | 0 | -7.844237 | 3.273798  | -1.109629 |
| 52 | 7 | 0 | -4.253838 | -0.392593 | -0.025471 |
| 53 | 6 | 0 | 2.082134  | 1.937292  | 0.232088  |
| 54 | 6 | 0 | 1.442223  | 2.616147  | -0.809015 |
| 55 | 6 | 0 | 2.503448  | 2.626009  | 1.373577  |
| 56 | 6 | 0 | 1.212325  | 3.986638  | -0.696554 |
| 57 | 1 | 0 | 1.132711  | 2.069342  | -1.693049 |
| 58 | 6 | 0 | 2.280012  | 3.999927  | 1.471432  |
| 59 | 1 | 0 | 2.994575  | 2.081644  | 2.173699  |
| 60 | 6 | 0 | 1.631393  | 4.681366  | 0.440086  |
| 61 | 1 | 0 | 0.713520  | 4.513476  | -1.504203 |

|    |   |   |          |          |          |
|----|---|---|----------|----------|----------|
| 62 | 1 | 0 | 2.606874 | 4.534412 | 2.358125 |
| 63 | 1 | 0 | 1.454631 | 5.749434 | 0.520685 |

**AC-2**

Total Energy (a.u.): - 1627.4413

**Table ST18: Optimized Cartesian coordinates:**

| Center<br>Number | Atomic<br>Number | Atomic<br>Type | Coordinates (Angstroms) |           |           |
|------------------|------------------|----------------|-------------------------|-----------|-----------|
|                  |                  |                | X                       | Y         | Z         |
| 1                | 6                | 0              | -5.797195               | 1.145511  | -0.277592 |
| 2                | 6                | 0              | -4.985557               | 0.044538  | -0.094577 |
| 3                | 6                | 0              | -5.603864               | -1.232887 | 0.110289  |
| 4                | 6                | 0              | -6.988775               | -1.427802 | 0.132931  |
| 5                | 6                | 0              | -7.799099               | -0.269578 | -0.060329 |
| 6                | 6                | 0              | -7.209868               | 0.965566  | -0.256143 |
| 7                | 1                | 0              | -5.385721               | 2.137549  | -0.435021 |
| 8                | 6                | 0              | -4.650554               | -2.280754 | 0.293519  |
| 9                | 6                | 0              | -7.438353               | -2.764612 | 0.351888  |
| 10               | 1                | 0              | -8.881833               | -0.361181 | -0.051777 |
| 11               | 1                | 0              | -7.841925               | 1.837104  | -0.399988 |
| 12               | 6                | 0              | -6.522365               | -3.784183 | 0.529266  |
| 13               | 6                | 0              | -5.114928               | -3.560215 | 0.503954  |
| 14               | 1                | 0              | -8.503652               | -2.977042 | 0.379673  |
| 15               | 1                | 0              | -6.881683               | -4.795728 | 0.695084  |
| 16               | 1                | 0              | -4.433024               | -4.392479 | 0.649106  |
| 17               | 6                | 0              | -3.560528               | -0.259578 | -0.038611 |
| 18               | 6                | 0              | -3.348097               | -1.610701 | 0.197133  |
| 19               | 6                | 0              | -1.400222               | -0.733013 | 0.103724  |
| 20               | 7                | 0              | -2.311539               | 0.317542  | -0.095656 |
| 21               | 7                | 0              | -2.022445               | -1.897705 | 0.285531  |
| 22               | 6                | 0              | 0.061858                | -0.613455 | 0.076163  |
| 23               | 6                | 0              | 0.753844                | 0.368984  | -0.653583 |
| 24               | 6                | 0              | 0.814780                | -1.574989 | 0.776351  |
| 25               | 6                | 0              | 2.145351                | 0.395008  | -0.673441 |
| 26               | 1                | 0              | 0.209541                | 1.099984  | -1.238975 |
| 27               | 6                | 0              | 2.203174                | -1.542403 | 0.769290  |
| 28               | 1                | 0              | 0.286279                | -2.342419 | 1.330272  |
| 29               | 6                | 0              | 2.883112                | -0.554065 | 0.043652  |
| 30               | 1                | 0              | 2.666733                | 1.139417  | -1.265840 |
| 31               | 1                | 0              | 2.769627                | -2.272542 | 1.337636  |
| 32               | 6                | 0              | 5.144642                | -1.581197 | -0.322055 |
| 33               | 6                | 0              | 5.098275                | 0.580711  | 0.369410  |
| 34               | 6                | 0              | 4.816336                | -2.865721 | -0.764525 |
| 35               | 6                | 0              | 6.493136                | -1.156991 | -0.208442 |

|    |   |   |           |           |           |
|----|---|---|-----------|-----------|-----------|
| 36 | 6 | 0 | 4.716774  | 1.848972  | 0.816189  |
| 37 | 6 | 0 | 6.463792  | 0.221129  | 0.234831  |
| 38 | 6 | 0 | 5.862973  | -3.731222 | -1.074104 |
| 39 | 1 | 0 | 3.783472  | -3.178119 | -0.869788 |
| 40 | 6 | 0 | 7.525521  | -2.047471 | -0.525581 |
| 41 | 6 | 0 | 5.725668  | 2.763520  | 1.110118  |
| 42 | 1 | 0 | 3.671631  | 2.111867  | 0.935354  |
| 43 | 6 | 0 | 7.457227  | 1.159913  | 0.536048  |
| 44 | 6 | 0 | 7.205096  | -3.332147 | -0.953486 |
| 45 | 1 | 0 | 5.633004  | -4.735142 | -1.418686 |
| 46 | 1 | 0 | 8.563118  | -1.736627 | -0.442831 |
| 47 | 6 | 0 | 7.083089  | 2.428410  | 0.969146  |
| 48 | 1 | 0 | 5.454020  | 3.755893  | 1.458140  |
| 49 | 1 | 0 | 8.506984  | 0.898501  | 0.437349  |
| 50 | 1 | 0 | 7.996833  | -4.032466 | -1.201110 |
| 51 | 1 | 0 | 7.844578  | 3.165442  | 1.204860  |
| 52 | 7 | 0 | 4.301976  | -0.519544 | 0.030300  |
| 53 | 6 | 0 | -2.069497 | 1.724690  | -0.186182 |
| 54 | 6 | 0 | -1.451037 | 2.404960  | 0.866321  |
| 55 | 6 | 0 | -2.485414 | 2.425723  | -1.320391 |
| 56 | 6 | 0 | -1.240707 | 3.778075  | 0.770289  |
| 57 | 1 | 0 | -1.137063 | 1.856350  | 1.747860  |
| 58 | 6 | 0 | -2.279225 | 3.803050  | -1.396609 |
| 59 | 1 | 0 | -2.957467 | 1.889299  | -2.137341 |
| 60 | 6 | 0 | -1.653596 | 4.502908  | -0.357005 |
| 61 | 1 | 0 | -0.753713 | 4.297849  | 1.591095  |
| 62 | 1 | 0 | -2.602660 | 4.339630  | -2.284455 |
| 63 | 6 | 0 | -1.451554 | 5.997319  | -0.433474 |
| 64 | 1 | 0 | -2.250228 | 6.531182  | 0.096092  |
| 65 | 1 | 0 | -0.504050 | 6.296577  | 0.024583  |
| 66 | 1 | 0 | -1.454025 | 6.349044  | -1.468812 |

-----  
**AC-3**

Total Energy (a.u.): -2014.5655

**Table ST19: Optimized Cartesian coordinates:**

| Center<br>Number | Atomic<br>Number | Atomic<br>Type | Coordinates (Angstroms) |           |           |
|------------------|------------------|----------------|-------------------------|-----------|-----------|
|                  |                  |                | X                       | Y         | Z         |
| 1                | 6                | 0              | 5.645636                | -0.472425 | -0.640166 |
| 2                | 6                | 0              | 4.777281                | -1.498375 | -0.328056 |
| 3                | 6                | 0              | 5.326134                | -2.777745 | 0.015133  |
| 4                | 6                | 0              | 6.698289                | -3.046757 | 0.050046  |
| 5                | 6                | 0              | 7.568749                | -1.965110 | -0.278411 |

|    |   |   |           |           |           |
|----|---|---|-----------|-----------|-----------|
| 6  | 6 | 0 | 7.046343  | -0.728346 | -0.608384 |
| 7  | 1 | 0 | 5.287022  | 0.516993  | -0.906190 |
| 8  | 6 | 0 | 4.318360  | -3.742195 | 0.323345  |
| 9  | 6 | 0 | 7.075901  | -4.373514 | 0.416552  |
| 10 | 1 | 0 | 8.644760  | -2.116238 | -0.266893 |
| 11 | 1 | 0 | 7.723763  | 0.084329  | -0.854148 |
| 12 | 6 | 0 | 6.107095  | -5.312737 | 0.715570  |
| 13 | 6 | 0 | 4.713975  | -5.013769 | 0.674923  |
| 14 | 1 | 0 | 8.128022  | -4.641556 | 0.460823  |
| 15 | 1 | 0 | 6.411812  | -6.317691 | 0.993191  |
| 16 | 1 | 0 | 3.989152  | -5.784383 | 0.918921  |
| 17 | 6 | 0 | 3.338700  | -1.712211 | -0.226777 |
| 18 | 6 | 0 | 3.053979  | -3.013916 | 0.162082  |
| 19 | 6 | 0 | 1.158537  | -2.039961 | -0.010210 |
| 20 | 7 | 0 | 2.124069  | -1.073374 | -0.336461 |
| 21 | 7 | 0 | 1.715614  | -3.211307 | 0.296269  |
| 22 | 6 | 0 | -0.294069 | -1.834641 | -0.038809 |
| 23 | 6 | 0 | -0.935504 | -0.916112 | -0.888164 |
| 24 | 6 | 0 | -1.093305 | -2.645291 | 0.788879  |
| 25 | 6 | 0 | -2.321889 | -0.788930 | -0.884528 |
| 26 | 1 | 0 | -0.355239 | -0.298948 | -1.563494 |
| 27 | 6 | 0 | -2.478100 | -2.534878 | 0.778684  |
| 28 | 1 | 0 | -0.605607 | -3.376813 | 1.423120  |
| 29 | 6 | 0 | -3.105766 | -1.595400 | -0.050829 |
| 30 | 1 | 0 | -2.803091 | -0.062911 | -1.531142 |
| 31 | 1 | 0 | -3.082620 | -3.180451 | 1.407111  |
| 32 | 6 | 0 | 1.957689  | 0.330598  | -0.562245 |
| 33 | 6 | 0 | 1.430019  | 1.141134  | 0.452855  |
| 34 | 6 | 0 | 2.361396  | 0.879145  | -1.785518 |
| 35 | 6 | 0 | 1.300281  | 2.503947  | 0.222159  |
| 36 | 1 | 0 | 1.137553  | 0.690888  | 1.396290  |
| 37 | 6 | 0 | 2.238112  | 2.250721  | -2.012747 |
| 38 | 1 | 0 | 2.763195  | 0.224084  | -2.551785 |
| 39 | 6 | 0 | 0.767784  | 3.583545  | 1.163199  |
| 40 | 6 | 0 | 1.703269  | 3.061079  | -1.009477 |
| 41 | 1 | 0 | 2.551824  | 2.671568  | -2.963485 |
| 42 | 6 | 0 | 0.913553  | 4.829950  | 0.291462  |
| 43 | 6 | 0 | 1.458920  | 4.508026  | -0.967454 |
| 44 | 6 | 0 | 0.588698  | 6.148176  | 0.593798  |
| 45 | 6 | 0 | 1.680152  | 5.499500  | -1.925416 |
| 46 | 6 | 0 | 0.810088  | 7.142827  | -0.365891 |
| 47 | 1 | 0 | 0.166992  | 6.410406  | 1.560607  |
| 48 | 6 | 0 | 1.351281  | 6.820253  | -1.614805 |
| 49 | 1 | 0 | 2.099735  | 5.253109  | -2.896840 |
| 50 | 1 | 0 | 0.558721  | 8.174733  | -0.139040 |
| 51 | 1 | 0 | 1.516315  | 7.603687  | -2.348510 |

|    |   |   |           |           |           |
|----|---|---|-----------|-----------|-----------|
| 52 | 6 | 0 | -0.713147 | 3.326704  | 1.569271  |
| 53 | 1 | 0 | -0.740772 | 2.423439  | 2.192134  |
| 54 | 1 | 0 | -1.026053 | 4.152468  | 2.220915  |
| 55 | 6 | 0 | 1.617000  | 3.683560  | 2.465562  |
| 56 | 1 | 0 | 1.476818  | 2.753118  | 3.030615  |
| 57 | 1 | 0 | 1.184587  | 4.480037  | 3.084549  |
| 58 | 6 | 0 | 3.113585  | 3.943576  | 2.274143  |
| 59 | 1 | 0 | 3.293117  | 4.888010  | 1.752191  |
| 60 | 1 | 0 | 3.615943  | 3.997312  | 3.245092  |
| 61 | 1 | 0 | 3.589947  | 3.144779  | 1.697894  |
| 62 | 6 | 0 | -1.710675 | 3.179507  | 0.417551  |
| 63 | 1 | 0 | -2.721396 | 3.029398  | 0.809368  |
| 64 | 1 | 0 | -1.726412 | 4.070393  | -0.217216 |
| 65 | 1 | 0 | -1.469866 | 2.317978  | -0.211839 |
| 66 | 6 | 0 | -5.318405 | -1.216321 | 1.071730  |
| 67 | 6 | 0 | -5.350966 | -1.543933 | -1.174516 |
| 68 | 6 | 0 | -4.943302 | -1.026156 | 2.404660  |
| 69 | 6 | 0 | -6.674288 | -1.132969 | 0.663615  |
| 70 | 6 | 0 | -5.020717 | -1.810343 | -2.506336 |
| 71 | 6 | 0 | -6.695217 | -1.343765 | -0.768739 |
| 72 | 6 | 0 | -5.950993 | -0.769550 | 3.331701  |
| 73 | 1 | 0 | -3.903651 | -1.072663 | 2.708945  |
| 74 | 6 | 0 | -7.666794 | -0.874106 | 1.615947  |
| 75 | 6 | 0 | -6.058149 | -1.853311 | -3.434958 |
| 76 | 1 | 0 | -3.993869 | -1.984936 | -2.807586 |
| 77 | 6 | 0 | -7.718217 | -1.391766 | -1.722863 |
| 78 | 6 | 0 | -7.300548 | -0.697045 | 2.946765  |
| 79 | 1 | 0 | -5.684018 | -0.620921 | 4.373934  |
| 80 | 1 | 0 | -8.709299 | -0.808585 | 1.317670  |
| 81 | 6 | 0 | -7.393981 | -1.642520 | -3.052641 |
| 82 | 1 | 0 | -5.826369 | -2.057788 | -4.476111 |
| 83 | 1 | 0 | -8.752313 | -1.239769 | -1.426860 |
| 84 | 1 | 0 | -8.061598 | -0.497776 | 3.694897  |
| 85 | 1 | 0 | -8.178451 | -1.681156 | -3.802126 |
| 86 | 7 | 0 | -4.519585 | -1.465753 | -0.050543 |

-----  
**AC-4**

Total Energy (a.u.): -1925.1550

**Table ST20: Optimized Cartesian coordinates:**

-----

| Center<br>Number | Atomic<br>Number | Atomic<br>Type | Coordinates (Angstroms) |          |          |
|------------------|------------------|----------------|-------------------------|----------|----------|
|                  |                  |                | X                       | Y        | Z        |
| 1                | 6                | 0              | -5.508117               | 0.247989 | 0.176920 |

-----



|    |   |   |           |           |           |
|----|---|---|-----------|-----------|-----------|
| 2  | 6 | 0 | -4.589565 | -0.783510 | 0.170561  |
| 3  | 6 | 0 | -5.079382 | -2.131609 | 0.163033  |
| 4  | 6 | 0 | -6.438771 | -2.462193 | 0.164421  |
| 5  | 6 | 0 | -7.360150 | -1.373678 | 0.175857  |
| 6  | 6 | 0 | -6.895861 | -0.071804 | 0.181401  |
| 7  | 1 | 0 | -5.207275 | 1.290865  | 0.170503  |
| 8  | 6 | 0 | -4.029002 | -3.098734 | 0.153149  |
| 9  | 6 | 0 | -6.754393 | -3.853857 | 0.157094  |
| 10 | 1 | 0 | -8.428640 | -1.571024 | 0.178618  |
| 11 | 1 | 0 | -7.610436 | 0.745915  | 0.187374  |
| 12 | 6 | 0 | -5.742815 | -4.795554 | 0.148367  |
| 13 | 6 | 0 | -4.364360 | -4.434680 | 0.146040  |
| 14 | 1 | 0 | -7.793951 | -4.170082 | 0.158770  |
| 15 | 1 | 0 | -6.001223 | -5.850465 | 0.142572  |
| 16 | 1 | 0 | -3.603079 | -5.208634 | 0.137612  |
| 17 | 6 | 0 | -3.139786 | -0.956563 | 0.159153  |
| 18 | 6 | 0 | -2.798092 | -2.300813 | 0.157768  |
| 19 | 6 | 0 | -0.938239 | -1.246721 | 0.205003  |
| 20 | 7 | 0 | -1.945372 | -0.264141 | 0.199631  |
| 21 | 7 | 0 | -1.448373 | -2.474828 | 0.185111  |
| 22 | 6 | 0 | 0.503867  | -0.981224 | 0.161868  |
| 23 | 6 | 0 | 1.065781  | 0.132323  | -0.486051 |
| 24 | 6 | 0 | 1.372610  | -1.923996 | 0.741316  |
| 25 | 6 | 0 | 2.445605  | 0.303690  | -0.542669 |
| 26 | 1 | 0 | 0.427985  | 0.852090  | -0.986266 |
| 27 | 6 | 0 | 2.749908  | -1.747774 | 0.699246  |
| 28 | 1 | 0 | 0.945288  | -2.792573 | 1.229648  |
| 29 | 6 | 0 | 3.300570  | -0.629961 | 0.056237  |
| 30 | 1 | 0 | 2.867462  | 1.149095  | -1.075579 |
| 31 | 1 | 0 | 3.407177  | -2.466868 | 1.176435  |
| 32 | 6 | 0 | 5.635707  | -1.389702 | -0.464781 |
| 33 | 6 | 0 | 5.403564  | 0.693555  | 0.410678  |
| 34 | 6 | 0 | 5.419516  | -2.658902 | -1.008603 |
| 35 | 6 | 0 | 6.938706  | -0.841056 | -0.356513 |
| 36 | 6 | 0 | 4.917968  | 1.876484  | 0.974865  |
| 37 | 6 | 0 | 6.791125  | 0.485991  | 0.203663  |
| 38 | 6 | 0 | 6.533992  | -3.384262 | -1.423891 |
| 39 | 1 | 0 | 4.419920  | -3.065621 | -1.112519 |
| 40 | 6 | 0 | 8.041200  | -1.591606 | -0.781163 |
| 41 | 6 | 0 | 5.843017  | 2.862200  | 1.311832  |
| 42 | 1 | 0 | 3.857968  | 2.022687  | 1.149759  |
| 43 | 6 | 0 | 7.698925  | 1.492846  | 0.551141  |
| 44 | 6 | 0 | 7.833490  | -2.862113 | -1.309216 |
| 45 | 1 | 0 | 6.391067  | -4.373525 | -1.848514 |
| 46 | 1 | 0 | 9.045106  | -1.183941 | -0.703789 |
| 47 | 6 | 0 | 7.219873  | 2.678428  | 1.100258  |

|    |   |   |           |           |           |
|----|---|---|-----------|-----------|-----------|
| 48 | 1 | 0 | 5.489226  | 3.791014  | 1.749713  |
| 49 | 1 | 0 | 8.764400  | 1.347522  | 0.397537  |
| 50 | 1 | 0 | 8.680537  | -3.454624 | -1.640820 |
| 51 | 1 | 0 | 7.914158  | 3.467478  | 1.372079  |
| 52 | 7 | 0 | 4.706400  | -0.451303 | 0.004136  |
| 53 | 6 | 0 | -1.838759 | 1.141068  | 0.409158  |
| 54 | 6 | 0 | -1.109369 | 1.651287  | 1.490419  |
| 55 | 6 | 0 | -2.526241 | 2.005209  | -0.442156 |
| 56 | 6 | 0 | -1.069695 | 3.026163  | 1.706937  |
| 57 | 1 | 0 | -0.588520 | 0.970394  | 2.153860  |
| 58 | 6 | 0 | -2.507614 | 3.379499  | -0.192928 |
| 59 | 1 | 0 | -3.078535 | 1.606189  | -1.285714 |
| 60 | 6 | 0 | -1.775698 | 3.897378  | 0.875050  |
| 61 | 1 | 0 | -0.501506 | 3.420375  | 2.543236  |
| 62 | 1 | 0 | -1.762678 | 4.965997  | 1.054030  |
| 63 | 6 | 0 | -3.348192 | 4.272639  | -1.065426 |
| 64 | 9 | 0 | -3.189762 | 3.983693  | -2.375455 |
| 65 | 9 | 0 | -4.666943 | 4.114251  | -0.789543 |
| 66 | 9 | 0 | -3.057849 | 5.577723  | -0.894881 |

---

## AC-5

Total Energy (a.u.): 1925.1546

### Table ST21: Optimized Cartesian coordinates:

---

| Center<br>Number | Atomic<br>Number | Atomic<br>Type | Coordinates (Angstroms) |           |           |
|------------------|------------------|----------------|-------------------------|-----------|-----------|
|                  |                  |                | X                       | Y         | Z         |
| 1                | 6                | 0              | -5.715573               | 0.360567  | -0.227288 |
| 2                | 6                | 0              | -4.850593               | -0.705441 | -0.083910 |
| 3                | 6                | 0              | -5.406500               | -2.017558 | 0.075357  |
| 4                | 6                | 0              | -6.780471               | -2.280198 | 0.087521  |
| 5                | 6                | 0              | -7.646087               | -1.156824 | -0.065584 |
| 6                | 6                | 0              | -7.117661               | 0.111897  | -0.214638 |
| 7                | 1                | 0              | -5.355295               | 1.377625  | -0.345286 |
| 8                | 6                | 0              | -4.404746               | -3.023652 | 0.226285  |
| 9                | 6                | 0              | -7.164615               | -3.644042 | 0.258286  |
| 10               | 1                | 0              | -8.723022               | -1.301031 | -0.062412 |
| 11               | 1                | 0              | -7.790880               | 0.956676  | -0.326913 |
| 12               | 6                | 0              | -6.200657               | -4.623806 | 0.403336  |
| 13               | 6                | 0              | -4.805964               | -4.330856 | 0.391296  |
| 14               | 1                | 0              | -8.218328               | -3.908684 | 0.275416  |
| 15               | 1                | 0              | -6.510739               | -5.656606 | 0.532919  |
| 16               | 1                | 0              | -4.084385               | -5.133191 | 0.510514  |

|    |   |   |           |           |           |
|----|---|---|-----------|-----------|-----------|
| 17 | 6 | 0 | -3.412062 | -0.943481 | -0.037198 |
| 18 | 6 | 0 | -3.136308 | -2.289157 | 0.156966  |
| 19 | 6 | 0 | -1.228841 | -1.323372 | 0.107494  |
| 20 | 7 | 0 | -2.187766 | -0.307201 | -0.064030 |
| 21 | 7 | 0 | -1.798079 | -2.517831 | 0.245398  |
| 22 | 6 | 0 | 0.225711  | -1.132742 | 0.079744  |
| 23 | 6 | 0 | 0.865097  | -0.135750 | -0.677271 |
| 24 | 6 | 0 | 1.026490  | -2.036707 | 0.801844  |
| 25 | 6 | 0 | 2.253035  | -0.038439 | -0.701994 |
| 26 | 1 | 0 | 0.282527  | 0.547987  | -1.283594 |
| 27 | 6 | 0 | 2.411484  | -1.932527 | 0.791007  |
| 28 | 1 | 0 | 0.539579  | -2.816194 | 1.376907  |
| 29 | 6 | 0 | 3.039579  | -0.929750 | 0.038275  |
| 30 | 1 | 0 | 2.734658  | 0.714163  | -1.316961 |
| 31 | 1 | 0 | 3.014790  | -2.616934 | 1.377734  |
| 32 | 6 | 0 | 5.350105  | -1.857760 | -0.280377 |
| 33 | 6 | 0 | 5.192703  | 0.333252  | 0.299909  |
| 34 | 6 | 0 | 5.090129  | -3.178327 | -0.657336 |
| 35 | 6 | 0 | 6.674330  | -1.358643 | -0.192717 |
| 36 | 6 | 0 | 4.748416  | 1.601339  | 0.684730  |
| 37 | 6 | 0 | 6.574266  | 0.037227  | 0.178993  |
| 38 | 6 | 0 | 6.180896  | -4.002659 | -0.924633 |
| 39 | 1 | 0 | 4.075660  | -3.550235 | -0.746437 |
| 40 | 6 | 0 | 7.752151  | -2.208496 | -0.466473 |
| 41 | 6 | 0 | 5.709968  | 2.579804  | 0.927492  |
| 42 | 1 | 0 | 3.692039  | 1.818422  | 0.796404  |
| 43 | 6 | 0 | 7.519386  | 1.038938  | 0.427963  |
| 44 | 6 | 0 | 7.500046  | -3.528551 | -0.827132 |
| 45 | 1 | 0 | 6.003662  | -5.033267 | -1.217624 |
| 46 | 1 | 0 | 8.771791  | -1.839401 | -0.402518 |
| 47 | 6 | 0 | 7.082190  | 2.307376  | 0.797392  |
| 48 | 1 | 0 | 5.388454  | 3.573373  | 1.225750  |
| 49 | 1 | 0 | 8.580784  | 0.825875  | 0.338464  |
| 50 | 1 | 0 | 8.327540  | -4.198103 | -1.040378 |
| 51 | 1 | 0 | 7.805565  | 3.093179  | 0.991705  |
| 52 | 7 | 0 | 4.453217  | -0.823494 | 0.020118  |
| 53 | 6 | 0 | -2.005008 | 1.106501  | -0.097073 |
| 54 | 6 | 0 | -1.335129 | 1.756211  | 0.944711  |
| 55 | 6 | 0 | -2.528560 | 1.842025  | -1.165659 |
| 56 | 6 | 0 | -1.180288 | 3.138808  | 0.909066  |
| 57 | 1 | 0 | -0.940811 | 1.177491  | 1.772090  |
| 58 | 6 | 0 | -2.381716 | 3.226716  | -1.190848 |
| 59 | 1 | 0 | -3.036321 | 1.324745  | -1.972733 |
| 60 | 6 | 0 | -1.703887 | 3.876163  | -0.156278 |
| 61 | 1 | 0 | -0.655112 | 3.646662  | 1.710175  |
| 62 | 1 | 0 | -2.776865 | 3.800319  | -2.021842 |

|    |   |   |           |          |           |
|----|---|---|-----------|----------|-----------|
| 63 | 6 | 0 | -1.588940 | 5.377405 | -0.161240 |
| 64 | 9 | 0 | -2.646704 | 5.959530 | 0.449644  |
| 65 | 9 | 0 | -0.480317 | 5.797058 | 0.486081  |
| 66 | 9 | 0 | -1.540886 | 5.870507 | -1.418156 |

-----

### AC-6

Total Energy (a.u.): -1680.3586

**Table ST22: Optimized Cartesian coordinates:**

| Center<br>Number | Atomic<br>Number | Atomic<br>Type | Coordinates (Angstroms) |           |           |
|------------------|------------------|----------------|-------------------------|-----------|-----------|
|                  |                  |                | X                       | Y         | Z         |
| 1                | 6                | 0              | 5.823046                | 1.177556  | 0.487371  |
| 2                | 6                | 0              | 5.028730                | 0.081386  | 0.217526  |
| 3                | 6                | 0              | 5.668761                | -1.162469 | -0.097972 |
| 4                | 6                | 0              | 7.056851                | -1.329409 | -0.142907 |
| 5                | 6                | 0              | 7.847850                | -0.177780 | 0.144399  |
| 6                | 6                | 0              | 7.238297                | 1.026019  | 0.445095  |
| 7                | 1                | 0              | 5.398180                | 2.147736  | 0.725147  |
| 8                | 6                | 0              | 4.734663                | -2.207185 | -0.370196 |
| 9                | 6                | 0              | 7.528930                | -2.633671 | -0.478971 |
| 10               | 1                | 0              | 8.931858                | -0.248660 | 0.123067  |
| 11               | 1                | 0              | 7.855312                | 1.894143  | 0.657476  |
| 12               | 6                | 0              | 6.630740                | -3.650543 | -0.742230 |
| 13               | 6                | 0              | 5.219906                | -3.454941 | -0.693723 |
| 14               | 1                | 0              | 8.597636                | -2.823283 | -0.528806 |
| 15               | 1                | 0              | 7.007268                | -4.636791 | -0.997352 |
| 16               | 1                | 0              | 4.551918                | -4.282856 | -0.910370 |
| 17               | 6                | 0              | 3.608881                | -0.244333 | 0.140527  |
| 18               | 6                | 0              | 3.421111                | -1.572083 | -0.213977 |
| 19               | 6                | 0              | 1.453183                | -0.749107 | -0.052545 |
| 20               | 7                | 0              | 2.344647                | 0.300921  | 0.241653  |
| 21               | 7                | 0              | 2.100326                | -1.876954 | -0.331327 |
| 22               | 6                | 0              | -0.010718               | -0.656896 | -0.016535 |
| 23               | 6                | 0              | -0.717508               | 0.203233  | 0.841616  |
| 24               | 6                | 0              | -0.747855               | -1.520983 | -0.847438 |
| 25               | 6                | 0              | -2.108956               | 0.212143  | 0.855930  |
| 26               | 1                | 0              | -0.185533               | 0.845307  | 1.533902  |
| 27               | 6                | 0              | -2.136693               | -1.506195 | -0.843077 |
| 28               | 1                | 0              | -0.208817               | -2.196811 | -1.501653 |
| 29               | 6                | 0              | -2.832199               | -0.635289 | 0.007759  |
| 30               | 1                | 0              | -2.642138               | 0.859620  | 1.543735  |

|    |   |   |           |           |           |
|----|---|---|-----------|-----------|-----------|
| 31 | 1 | 0 | -2.691695 | -2.156119 | -1.511141 |
| 32 | 6 | 0 | -5.083333 | -1.725947 | 0.211419  |
| 33 | 6 | 0 | -5.055524 | 0.516089  | -0.159067 |
| 34 | 6 | 0 | -4.745319 | -3.058322 | 0.463877  |
| 35 | 6 | 0 | -6.434764 | -1.299441 | 0.161334  |
| 36 | 6 | 0 | -4.685223 | 1.837953  | -0.421333 |
| 37 | 6 | 0 | -6.417037 | 0.128779  | -0.077291 |
| 38 | 6 | 0 | -5.785388 | -3.967427 | 0.644949  |
| 39 | 1 | 0 | -3.710447 | -3.376297 | 0.523846  |
| 40 | 6 | 0 | -7.460158 | -2.233790 | 0.346635  |
| 41 | 6 | 0 | -5.702320 | 2.776703  | -0.579712 |
| 42 | 1 | 0 | -3.643615 | 2.126181  | -0.508346 |
| 43 | 6 | 0 | -7.419129 | 1.092333  | -0.239649 |
| 44 | 6 | 0 | -7.130148 | -3.564749 | 0.583625  |
| 45 | 1 | 0 | -5.547726 | -5.008870 | 0.840741  |
| 46 | 1 | 0 | -8.499966 | -1.921574 | 0.310662  |
| 47 | 6 | 0 | -7.056341 | 2.412997  | -0.485953 |
| 48 | 1 | 0 | -5.438846 | 3.810009  | -0.784921 |
| 49 | 1 | 0 | -8.466427 | 0.810270  | -0.179631 |
| 50 | 1 | 0 | -7.916680 | -4.299083 | 0.727488  |
| 51 | 1 | 0 | -7.824407 | 3.169566  | -0.613345 |
| 52 | 7 | 0 | -4.249347 | -0.616797 | 0.016696  |
| 53 | 6 | 0 | 2.068859  | 1.683121  | 0.452571  |
| 54 | 6 | 0 | 1.361525  | 2.411025  | -0.505127 |
| 55 | 6 | 0 | 2.540826  | 2.310352  | 1.611170  |
| 56 | 6 | 0 | 1.111968  | 3.773859  | -0.287216 |
| 57 | 1 | 0 | 1.008657  | 1.926138  | -1.407392 |
| 58 | 6 | 0 | 2.302340  | 3.670301  | 1.812763  |
| 59 | 1 | 0 | 3.084126  | 1.726599  | 2.346827  |
| 60 | 6 | 0 | 1.585985  | 4.407329  | 0.873877  |
| 61 | 1 | 0 | 2.669258  | 4.153272  | 2.712482  |
| 62 | 1 | 0 | 1.390227  | 5.462631  | 1.027245  |
| 63 | 6 | 0 | 0.375611  | 4.526487  | -1.262283 |
| 64 | 7 | 0 | -0.223461 | 5.140864  | -2.047181 |

---

**The Comparison of our luminophores with other reported PA sensors.**

**Table ST23: The Comparison of our luminophores with other reported PA sensors.**

| S. No | Sensor                                                                                    | Solvent                    | Quenching constant (M-1) | Detection limit (M)    | Ref.      |
|-------|-------------------------------------------------------------------------------------------|----------------------------|--------------------------|------------------------|-----------|
| 1     | hexaphenylsilole                                                                          | THF/Water                  | -                        | 4.81 ppb               | 1         |
| 2     | tetraphenylethene                                                                         | Water                      | $2.7 \times 10^5$        | 0.4 ppm                | 2         |
| 3     | Polymers based on di (naphthalen-2-yl)-1,2-diphenylethene                                 | H <sub>2</sub> O/THF (9/1) | $4.70 \times 10^4$       | $1.81 \times 10^{-6}$  | 3         |
| 4     | Triazine-COF                                                                              | THF                        | $8.71 \times 10^4$       | 10.7 ppm               | 4         |
| 5     | poly(silylenevinylene)                                                                    | THF                        | $8.491 \times 10^3$      | 1.0 ppm                | 5         |
| 6     | Diphenylfumaronitriles                                                                    | H <sub>2</sub> O/THF (8/2) | $5.60 \times 10^4$       | $1.80 \times 10^{-10}$ | 6         |
| 7     | Imidazole derivatives                                                                     | H <sub>2</sub> O/DMF (9/1) | $1.30 \times 10^4$       | $3.55 \times 10^{-6}$  | 7         |
| 8     | Thiophene aromatic amine derivatives                                                      | THF                        | -                        | $5.70 \times 10^{-6}$  | 8         |
| 9     | 3-(Benzyloxy)-2-(4-(di-p-tolylamino)phenyl)-4H-chromen-4-one                              | Water                      | $1.93 \times 10^4$       | $3.70 \times 10^{-9}$  | 9         |
| 10    | [P(dimethylacrylamide-co-Benzophenone acrylamide-co-glycidyl methacrylate)]               | Water                      | $7.75 \times 10^4$       | $5.60 \times 10^{-7}$  | 10        |
| 11    | 9,14-diphenylpyreno [4,5-g]isoquinoline                                                   | MeCN                       | -                        | $2.42 \times 10^{-6}$  | 11        |
| 12    | 7,10-bis(4-bromophenyl)-8,9-bis(4-(2-(2-methoxyethoxy)ethoxy)ethoxy)-phenyl)-fluoranthene | EtOH                       | $5.60 \times 10^5$       | 2.6 ppb                | 12        |
| 13    | Fluorescein derivatives                                                                   | EtOH                       | $2.50 \times 10^5$       | $1.10 \times 10^{-7}$  | 13        |
| 14    | 1,3-Bis(benzo[d]thiazol-2-yl)benzene derivatives                                          | H <sub>2</sub> O/THF (9/1) | $1.54 \times 10^5$       | 29.1 ppb               | 14        |
| 15    | 1,3,5-tri(1H-benzo[d]imidazol-2-yl)benzene derivative                                     | THF                        | $1.15 \times 10^5$       | 50 ppb                 | 15        |
| 16    | tetraphenylethylene                                                                       | THF                        | $5.7 \times 10^4$        | 1.45 ppb               | 16        |
| 17    | terthiophene                                                                              | THF/water                  | $5.7 \times 10^3$        | 70 ppb                 | 17        |
| 18    | AC-2                                                                                      | THF                        | $2.5 \times 10^3$        | 450 ppb                | this work |

## References:

1. G. He, H. Peng, T. Liu, M. Yang, Y. Zhang and Y. Fang, *J. Mater. Chem.*, 2009, **19**, 7347-7353.
2. D. Li, J. Liu, R. T. K. Kwok, Z. Liang, B. Z. Tang and J. Yu, *Chem. Commun.*, 2012, **48**, 7167-7169.
3. Y. P. Zhuang, J. Y. Yao, Z. Y. Zhuang, C. J. Ni, H. M. Yao, D. L. Su, J. Zhou and Z. J. Zhao, *Dyes Pigm.*, 2020, **174**, 108041.
4. Y. J. Li, Y. N. Han, M. H. Chen, Y. Q. Feng and B. Zhang, *RSC Adv.*, 2019, **9**, 30937.
5. P. Lu, J. W. Y. Lam, J. Liu, C. K. W. Jim, W. Yuan, N. Xie, Y. Zhong, Q. Hu, K. S. Wong, K. K. L. Cheuk and B. Z. Tang, *Macromol. Rapid Commun.*, 2010, **31**, 834-839.
6. D. B. Wu, W. J. Gong, H. M. Yao, L. M. Huang, Z. H. Lin and Q. D. Ling, *Dyes Pigm.*, 2020, **172**, 107829.
7. S. S. Zhang, H. C. Zhu, J. Y. Huang, L. Kong, Y. P. Tian and J. X. Yang, *Chemistry Select*, 2019, **4**, 7380.
8. X. Lu, G. C. Zhang, D. D. Li, X. H. Tian, W. Ma, S. L. Li, Q. Zhang, H. P. Zhou, J. Y. Wu and Y. P., *Dyes Pigm.*, 2019, **170**, 107641.
9. Z. J. Luo, B. Liu, S. F. Si, Y. J. Lin, C. S. Luo, C. J. Pan, C. Zhao and L. Wang, *Dyes Pigm.*, 2017, **143**, 463.
10. M. Gupta and H. Lee, *ACS Appl. Mater. Interfaces*, 2018, **10**, 41717.
11. X. L. Yu, J. Q. Wan, S. Chen, M. Li, J. K. Gao, L. Yang, H. S. Wang, D. G. Chen, Z. Q. Pan and J. B. Li, *Talanta*, 2017, **174**, 462.
12. S. Kasthuri, S. Kumar, S. Raviteja, B. Ramakrishna, S. Maji, N. Veeraiah and N. Venkatramaiah, *Appl. Surf. Sci.*, 2019, **481**, 1018.
13. Z.-H. Fu, Y. W. Wang and Y. Peng, *Chem. Commun.*, 2017, **53**, 10524.
14. Si-Hong Chen, a Kai Jiang, Jian-Yun Lin, Kai Yang, Xi-Ying Cao, Xiao-Yan Luo and Zhao-Yang Wang, *J. Mater. Chem. C.*, 2020, **8**, 8257-8267
15. Jin-Feng Xiong, Jian-Xiao Li, Guang-Zhen Mo, Jing-Pei Huo, Jin-Yan Liu, Xiao-Yun Chen, and Zhao-Yang Wang, *J. Org. Chem.* 2014, **79**, 11619–11630.
16. H.-T. Feng and Y.-S. Zheng, *Chem. Eur. J.*, 2013, **20**, 195-201.
17. T. Liu, L. Ding, G. He, Y. Yang, W. Wang and Y. Fang, *ACS Appl. Mater. Interfaces*, 2011, **3**, 1245-1253.
